# Supplementary material
Source: publisher figshare collection journal article supplement (https://rs.figshare.com/ndownloader/files/17379770)
Supplement: Supplementary file 1 [file 17379770]

Supplementary Material for the manuscript
EXPERIMENTALLY DISENTANGLING INTRINSIC AND EXTRINSIC DRIVERS OF NATAL DISPERSAL IN A NOCTURNAL RAPTOR
By Julien Fattebert, Marco Perrig, Beat Naef-Daenzer, Martin U. Gr�ebler
Published in Proceedings B, doi 10.1098/rspb.2019.1537
******************************************************************************************************************************
Telemetry data of juvenile little owls
******************************************************************************************************************************
ring	sex	timestamp	loc_status	hatch_date	loc_age	CRS	x	y	x_box_foster	y_box_foster	fed	cross_fostered	phase
HF-46382	f	6/30/2009 12:00	alive	6/3/2009	27	EPSG:31466	3495303.25	5421141.5	3495303	5421141	unfed	not_crossed	natal
HF-46382	f	7/7/2009 23:10	alive	6/3/2009	34	EPSG:31466	3495159	5421127.5	3495303	5421141	unfed	not_crossed	natal
HF-46382	f	7/10/2009 2:30	alive	6/3/2009	37	EPSG:31466	3495159	5421127.5	3495303	5421141	unfed	not_crossed	natal
HF-46382	f	7/12/2009 22:30	alive	6/3/2009	39	EPSG:31466	3495159	5421127.5	3495303	5421141	unfed	not_crossed	natal
HF-46382	f	7/14/2009 22:05	alive	6/3/2009	41	EPSG:31466	3495159	5421127.5	3495303	5421141	unfed	not_crossed	natal
HF-46382	f	7/21/2009 0:30	alive	6/3/2009	48	EPSG:31466	3495159	5421127.5	3495303	5421141	unfed	not_crossed	natal
HF-46382	f	7/22/2009 21:15	alive	6/3/2009	49	EPSG:31466	3495159	5421127.5	3495303	5421141	unfed	not_crossed	natal
HF-46382	f	7/26/2009 0:30	alive	6/3/2009	53	EPSG:31466	3495159	5421127.5	3495303	5421141	unfed	not_crossed	natal
HF-46382	f	7/28/2009 22:55	alive	6/3/2009	55	EPSG:31466	3495042.75	5421063	3495303	5421141	unfed	not_crossed	natal
HF-46382	f	7/31/2009 1:25	alive	6/3/2009	58	EPSG:31466	3495159	5421127.5	3495303	5421141	unfed	not_crossed	natal
HF-46382	f	8/4/2009 16:15	alive	6/3/2009	62	EPSG:31466	3495299.25	5421137.5	3495303	5421141	unfed	not_crossed	natal
HF-46382	f	8/5/2009 1:10	alive	6/3/2009	63	EPSG:31466	3495165.5	5421094.5	3495303	5421141	unfed	not_crossed	natal
HF-46382	f	8/6/2009 21:30	alive	6/3/2009	64	EPSG:31466	3495160.5	5421109.5	3495303	5421141	unfed	not_crossed	natal
HF-46382	f	8/9/2009 0:30	alive	6/3/2009	67	EPSG:31466	3495157.25	5421127.5	3495303	5421141	unfed	not_crossed	natal
HF-46382	f	8/11/2009 6:10	alive	6/3/2009	69	EPSG:31466	3495157.25	5421127.5	3495303	5421141	unfed	not_crossed	natal
HF-46382	f	8/13/2009 14:00	alive	6/3/2009	71	EPSG:31466	3495160.25	5421129	3495303	5421141	unfed	not_crossed	natal
HF-46382	f	8/15/2009 4:30	alive	6/3/2009	73	EPSG:31466	3495170.5	5421078	3495303	5421141	unfed	not_crossed	natal
HF-46382	f	8/17/2009 4:40	alive	6/3/2009	75	EPSG:31466	3495157.25	5421129.5	3495303	5421141	unfed	not_crossed	natal
HF-46382	f	8/18/2009 22:25	alive	6/3/2009	76	EPSG:31466	3494860	5421043	3495303	5421141	unfed	not_crossed	forays
HF-46382	f	8/19/2009 17:50	alive	6/3/2009	77	EPSG:31466	3495156.25	5421131.5	3495303	5421141	unfed	not_crossed	natal
HF-46382	f	8/21/2009 22:00	alive	6/3/2009	79	EPSG:31466	3495057.5	5421021.5	3495303	5421141	unfed	not_crossed	natal
HF-46382	f	8/25/2009 4:30	alive	6/3/2009	83	EPSG:31466	3495076	5420983	3495303	5421141	unfed	not_crossed	natal
HF-46382	f	8/27/2009 3:00	alive	6/3/2009	85	EPSG:31466	3495155.5	5421129.5	3495303	5421141	unfed	not_crossed	natal
HF-46382	f	9/3/2009 4:40	alive	6/3/2009	92	EPSG:31466	3495291.75	5421566.5	3495303	5421141	unfed	not_crossed	dispersal
HF-46383	f	6/30/2009 12:00	alive	6/4/2009	26	EPSG:31466	3495303.25	5421141.5	3495303	5421141	unfed	not_crossed	natal
HF-46383	f	7/7/2009 23:25	alive	6/4/2009	33	EPSG:31466	3495151.75	5421131	3495303	5421141	unfed	not_crossed	natal
HF-46383	f	7/10/2009 2:25	alive	6/4/2009	36	EPSG:31466	3495152.5	5421131	3495303	5421141	unfed	not_crossed	natal
HF-46383	f	7/12/2009 22:25	alive	6/4/2009	38	EPSG:31466	3495151.75	5421131	3495303	5421141	unfed	not_crossed	natal
HF-46383	f	7/14/2009 22:00	alive	6/4/2009	40	EPSG:31466	3495154.75	5421135.5	3495303	5421141	unfed	not_crossed	natal
HF-46383	f	7/21/2009 0:20	alive	6/4/2009	47	EPSG:31466	3495156	5421129	3495303	5421141	unfed	not_crossed	natal
HF-46383	f	7/22/2009 21:25	alive	6/4/2009	48	EPSG:31466	3495153.75	5421134	3495303	5421141	unfed	not_crossed	natal
HF-46383	f	7/26/2009 0:30	alive	6/4/2009	52	EPSG:31466	3495153.75	5421129	3495303	5421141	unfed	not_crossed	natal
HF-46383	f	7/28/2009 23:10	alive	6/4/2009	54	EPSG:31466	3495044.25	5421129	3495303	5421141	unfed	not_crossed	natal
HF-46383	f	7/31/2009 1:15	alive	6/4/2009	57	EPSG:31466	3495153.75	5421133.5	3495303	5421141	unfed	not_crossed	natal
HF-46383	f	8/4/2009 16:15	alive	6/4/2009	61	EPSG:31466	3495297.75	5421141.5	3495303	5421141	unfed	not_crossed	natal
HF-46383	f	8/5/2009 1:25	alive	6/4/2009	62	EPSG:31466	3495152.5	5421134	3495303	5421141	unfed	not_crossed	natal
HF-46383	f	8/6/2009 21:40	alive	6/4/2009	63	EPSG:31466	3495151.75	5421133.5	3495303	5421141	unfed	not_crossed	natal
HF-46383	f	8/9/2009 0:40	alive	6/4/2009	66	EPSG:31466	3495153.75	5421135.5	3495303	5421141	unfed	not_crossed	natal
HF-46383	f	8/11/2009 6:20	alive	6/4/2009	68	EPSG:31466	3495153.25	5421132.5	3495303	5421141	unfed	not_crossed	natal
HF-46383	f	8/13/2009 14:00	alive	6/4/2009	70	EPSG:31466	3494916.75	5420990.5	3495303	5421141	unfed	not_crossed	forays
HF-46383	f	8/15/2009 4:20	alive	6/4/2009	72	EPSG:31466	3495158	5421171.5	3495303	5421141	unfed	not_crossed	natal
HF-46383	f	8/17/2009 4:50	alive	6/4/2009	74	EPSG:31466	3495151.75	5421133.5	3495303	5421141	unfed	not_crossed	natal
HF-46383	f	8/18/2009 22:30	alive	6/4/2009	75	EPSG:31466	3495153.75	5421133.5	3495303	5421141	unfed	not_crossed	natal
HF-46383	f	8/19/2009 17:50	alive	6/4/2009	76	EPSG:31466	3495156.75	5421130.5	3495303	5421141	unfed	not_crossed	natal
HF-46383	f	8/21/2009 22:15	alive	6/4/2009	78	EPSG:31466	3495050.5	5421030	3495303	5421141	unfed	not_crossed	natal
HF-46383	f	8/25/2009 4:45	alive	6/4/2009	82	EPSG:31466	3495042.25	5421131	3495303	5421141	unfed	not_crossed	natal
HF-46383	f	8/27/2009 3:15	alive	6/4/2009	84	EPSG:31466	3494943	5420984	3495303	5421141	unfed	not_crossed	forays
HF-46383	f	9/3/2009 4:40	alive	6/4/2009	91	EPSG:31466	3495292.25	5421115.5	3495303	5421141	unfed	not_crossed	natal
HF-46383	f	9/8/2009 3:52	alive	6/4/2009	96	EPSG:31466	3494482.75	5420922.5	3495303	5421141	unfed	not_crossed	forays
HF-46383	f	9/10/2009 5:25	alive	6/4/2009	98	EPSG:31466	3494968	5420747.5	3495303	5421141	unfed	not_crossed	forays
HF-46383	f	9/11/2009 23:29	alive	6/4/2009	99	EPSG:31466	3495279.5	5420721	3495303	5421141	unfed	not_crossed	forays
HF-46383	f	9/13/2009 20:55	alive	6/4/2009	101	EPSG:31466	3495116.5	5421195	3495303	5421141	unfed	not_crossed	natal
HF-46383	f	9/15/2009 12:00	alive	6/4/2009	103	EPSG:31466	3495303.25	5421135.5	3495303	5421141	unfed	not_crossed	natal
HF-46383	f	9/16/2009 4:30	alive	6/4/2009	104	EPSG:31466	3495154.5	5421133.5	3495303	5421141	unfed	not_crossed	natal
HF-46383	f	9/17/2009 22:21	alive	6/4/2009	105	EPSG:31466	3494908	5421219	3495303	5421141	unfed	not_crossed	forays
HF-46383	f	9/19/2009 12:00	alive	6/4/2009	107	EPSG:31466	3495302	5421141.5	3495303	5421141	unfed	not_crossed	natal
HF-46383	f	9/21/2009 22:30	alive	6/4/2009	109	EPSG:31466	3495366.25	5420803	3495303	5421141	unfed	not_crossed	forays
HF-46383	f	9/22/2009 12:00	alive	6/4/2009	110	EPSG:31466	3495303	5421142.5	3495303	5421141	unfed	not_crossed	natal
HF-46383	f	9/25/2009 12:00	alive	6/4/2009	113	EPSG:31466	3499845	5409676	3495303	5421141	unfed	not_crossed	dispersal
HF-46383	f	9/26/2009 12:00	alive	6/4/2009	114	EPSG:31466	3499844.75	5409677	3495303	5421141	unfed	not_crossed	dispersal
HF-46383	f	9/27/2009 6:34	alive	6/4/2009	115	EPSG:31466	3500133.5	5409052.5	3495303	5421141	unfed	not_crossed	dispersal
HF-46383	f	9/28/2009 12:00	alive	6/4/2009	116	EPSG:31466	3500289.75	5409525	3495303	5421141	unfed	not_crossed	dispersal
HF-46383	f	9/29/2009 4:55	alive	6/4/2009	117	EPSG:31466	3500395	5409340.5	3495303	5421141	unfed	not_crossed	dispersal
HF-46383	f	10/1/2009 21:05	alive	6/4/2009	119	EPSG:31466	3500962.5	5410467.5	3495303	5421141	unfed	not_crossed	dispersal
HF-46383	f	10/4/2009 21:09	alive	6/4/2009	122	EPSG:31466	3501133.25	5410129	3495303	5421141	unfed	not_crossed	dispersal
HF-46383	f	10/10/2009 21:05	alive	6/4/2009	128	EPSG:31466	3500307	5409166.5	3495303	5421141	unfed	not_crossed	dispersal
HF-46383	f	10/11/2009 21:25	alive	6/4/2009	129	EPSG:31466	3500364	5409557	3495303	5421141	unfed	not_crossed	dispersal
HF-46383	f	10/14/2009 19:46	alive	6/4/2009	132	EPSG:31466	3500916.25	5409443.5	3495303	5421141	unfed	not_crossed	dispersal
HF-46383	f	10/16/2009 12:00	alive	6/4/2009	134	EPSG:31466	3500305.5	5409480	3495303	5421141	unfed	not_crossed	dispersal
HF-46383	f	10/17/2009 21:41	alive	6/4/2009	135	EPSG:31466	3500709.75	5409504.5	3495303	5421141	unfed	not_crossed	dispersal
HF-46383	f	10/20/2009 21:35	alive	6/4/2009	138	EPSG:31466	3500334.5	5409420	3495303	5421141	unfed	not_crossed	dispersal
HF-46383	f	10/26/2009 20:45	alive	6/4/2009	144	EPSG:31466	3501122.75	5409818.5	3495303	5421141	unfed	not_crossed	dispersal
HF-46383	f	10/30/2009 19:25	alive	6/4/2009	148	EPSG:31466	3500983.75	5409570	3495303	5421141	unfed	not_crossed	dispersal
HF-46383	f	11/1/2009 22:00	alive	6/4/2009	150	EPSG:31466	3500431.5	5409095.5	3495303	5421141	unfed	not_crossed	dispersal
HF-46383	f	11/3/2009 18:15	alive	6/4/2009	152	EPSG:31466	3500458.75	5409296	3495303	5421141	unfed	not_crossed	dispersal
HF-46383	f	11/5/2009 12:00	alive	6/4/2009	154	EPSG:31466	3500308.75	5409477.5	3495303	5421141	unfed	not_crossed	dispersal
HF-46383	f	11/10/2009 18:24	alive	6/4/2009	159	EPSG:31466	3500313.5	5409479	3495303	5421141	unfed	not_crossed	dispersal
HF-46383	f	11/12/2009 20:10	alive	6/4/2009	161	EPSG:31466	3500240.75	5409436	3495303	5421141	unfed	not_crossed	dispersal
HF-46383	f	11/16/2009 12:00	alive	6/4/2009	165	EPSG:31466	3500310	5409481.5	3495303	5421141	unfed	not_crossed	dispersal
HF-46383	f	11/20/2009 20:05	alive	6/4/2009	169	EPSG:31466	3500405	5409214.5	3495303	5421141	unfed	not_crossed	dispersal
HF-46383	f	11/23/2009 0:06	alive	6/4/2009	172	EPSG:31466	3500274	5409409	3495303	5421141	unfed	not_crossed	dispersal
HF-46383	f	11/25/2009 19:50	alive	6/4/2009	174	EPSG:31466	3500244	5409399.5	3495303	5421141	unfed	not_crossed	dispersal
HF-46383	f	12/3/2009 7:20	alive	6/4/2009	182	EPSG:31466	3500242.25	5409426.5	3495303	5421141	unfed	not_crossed	dispersal
HF-46383	f	12/5/2009 4:37	alive	6/4/2009	184	EPSG:31466	3500239.25	5409426.5	3495303	5421141	unfed	not_crossed	dispersal
HF-46383	f	12/9/2009 21:00	alive	6/4/2009	188	EPSG:31466	3500293	5409490	3495303	5421141	unfed	not_crossed	dispersal
HF-46383	f	12/11/2009 18:20	alive	6/4/2009	190	EPSG:31466	3500245.5	5409395	3495303	5421141	unfed	not_crossed	dispersal
HF-46383	f	12/19/2009 21:40	alive	6/4/2009	198	EPSG:31466	3500223.25	5409539	3495303	5421141	unfed	not_crossed	dispersal
HF-46383	f	1/5/2010 22:15	alive	6/4/2009	215	EPSG:31466	3500373.5	5409474	3495303	5421141	unfed	not_crossed	dispersal
HF-46383	f	1/21/2010 12:30	alive	6/4/2009	231	EPSG:31466	3500251.75	5409365	3495303	5421141	unfed	not_crossed	dispersal
HF-46383	f	2/8/2010 23:40	alive	6/4/2009	249	EPSG:31466	3501031	5409543.5	3495303	5421141	unfed	not_crossed	dispersal
HF-46383	f	3/3/2010 23:40	alive	6/4/2009	272	EPSG:31466	3501404.25	5409564	3495303	5421141	unfed	not_crossed	dispersal
HF-46425	f	6/16/2009 12:00	alive	5/17/2009	30	EPSG:31466	3505837.75	5426451.5	3505838	5426452	unfed	not_crossed	natal
HF-46425	f	6/26/2009 12:00	alive	5/17/2009	40	EPSG:31466	3505829.25	5426346	3505838	5426452	unfed	not_crossed	natal
HF-46425	f	7/2/2009 3:10	alive	5/17/2009	46	EPSG:31466	3505828.5	5426379.5	3505838	5426452	unfed	not_crossed	natal
HF-46425	f	7/7/2009 22:56	alive	5/17/2009	51	EPSG:31466	3505826.75	5426379.5	3505838	5426452	unfed	not_crossed	natal
HF-46425	f	7/9/2009 23:35	alive	5/17/2009	53	EPSG:31466	3505825	5426385	3505838	5426452	unfed	not_crossed	natal
HF-46425	f	7/13/2009 0:50	alive	5/17/2009	57	EPSG:31466	3505825	5426383	3505838	5426452	unfed	not_crossed	natal
HF-46425	f	7/14/2009 23:10	alive	5/17/2009	58	EPSG:31466	3505825	5426435	3505838	5426452	unfed	not_crossed	natal
HF-46425	f	7/21/2009 12:00	alive	5/17/2009	65	EPSG:31466	3505833.75	5426330	3505838	5426452	unfed	not_crossed	natal
HF-46425	f	7/22/2009 1:15	alive	5/17/2009	66	EPSG:31466	3505833.75	5426452.5	3505838	5426452	unfed	not_crossed	natal
HF-46425	f	7/23/2009 0:25	alive	5/17/2009	67	EPSG:31466	3505925.75	5426412.5	3505838	5426452	unfed	not_crossed	natal
HF-46425	f	7/25/2009 22:10	alive	5/17/2009	69	EPSG:31466	3505924	5426416	3505838	5426452	unfed	not_crossed	natal
HF-46425	f	7/29/2009 1:55	alive	5/17/2009	73	EPSG:31466	3505944.75	5426425	3505838	5426452	unfed	not_crossed	natal
HF-46425	f	7/31/2009 4:10	alive	5/17/2009	75	EPSG:31466	3505859.75	5426496	3505838	5426452	unfed	not_crossed	natal
HF-46425	f	8/4/2009 22:30	alive	5/17/2009	79	EPSG:31466	3505891	5426934	3505838	5426452	unfed	not_crossed	forays
HF-46425	f	8/6/2009 23:15	alive	5/17/2009	81	EPSG:31466	3505826.75	5426415	3505838	5426452	unfed	not_crossed	natal
HF-46425	f	8/8/2009 21:25	alive	5/17/2009	83	EPSG:31466	3505828.5	5426417	3505838	5426452	unfed	not_crossed	natal
HF-46425	f	8/11/2009 4:30	alive	5/17/2009	86	EPSG:31466	3505884	5426675.5	3505838	5426452	unfed	not_crossed	natal
HF-46425	f	8/13/2009 1:45	alive	5/17/2009	88	EPSG:31466	3505694.75	5427213.5	3505838	5426452	unfed	not_crossed	forays
HF-46425	f	8/14/2009 12:45	alive	5/17/2009	89	EPSG:31466	3505825.75	5426410.5	3505838	5426452	unfed	not_crossed	natal
HF-46425	f	8/15/2009 2:20	alive	5/17/2009	90	EPSG:31466	3505988.25	5426706.5	3505838	5426452	unfed	not_crossed	natal
HF-46425	f	8/16/2009 23:20	alive	5/17/2009	91	EPSG:31466	3505934.25	5426719	3505838	5426452	unfed	not_crossed	natal
HF-46425	f	8/18/2009 15:20	alive	5/17/2009	93	EPSG:31466	3505843.75	5426334	3505838	5426452	unfed	not_crossed	natal
HF-46425	f	8/19/2009 5:00	alive	5/17/2009	94	EPSG:31466	3505547.25	5427106	3505838	5426452	unfed	not_crossed	forays
HF-46425	f	8/21/2009 2:35	alive	5/17/2009	96	EPSG:31466	3505588.75	5426134	3505838	5426452	unfed	not_crossed	forays
HF-46425	f	8/24/2009 4:45	alive	5/17/2009	99	EPSG:31466	3505458.75	5426595.5	3505838	5426452	unfed	not_crossed	forays
HF-46425	f	8/26/2009 5:55	alive	5/17/2009	101	EPSG:31466	3505965.5	5426381.5	3505838	5426452	unfed	not_crossed	natal
HF-46425	f	8/27/2009 20:55	alive	5/17/2009	102	EPSG:31466	3506054.25	5425932.5	3505838	5426452	unfed	not_crossed	forays
HF-46425	f	9/1/2009 22:11	alive	5/17/2009	107	EPSG:31466	3505944.75	5426425.5	3505838	5426452	unfed	not_crossed	natal
HF-46425	f	9/4/2009 23:00	alive	5/17/2009	110	EPSG:31466	3505845.75	5426446.5	3505838	5426452	unfed	not_crossed	natal
HF-46425	f	9/9/2009 4:20	alive	5/17/2009	115	EPSG:31466	3505496.75	5427516	3505838	5426452	unfed	not_crossed	forays
HF-46425	f	9/11/2009 5:50	alive	5/17/2009	117	EPSG:31466	3506038.5	5426375	3505838	5426452	unfed	not_crossed	natal
HF-46425	f	9/12/2009 22:56	alive	5/17/2009	118	EPSG:31466	3505785	5426422	3505838	5426452	unfed	not_crossed	natal
HF-46425	f	9/14/2009 21:33	alive	5/17/2009	120	EPSG:31466	3505946.5	5426453.5	3505838	5426452	unfed	not_crossed	natal
HF-46425	f	9/16/2009 12:00	alive	5/17/2009	122	EPSG:31466	3505837.5	5426451	3505838	5426452	unfed	not_crossed	natal
HF-46425	f	9/17/2009 6:20	alive	5/17/2009	123	EPSG:31466	3505832	5426312.5	3505838	5426452	unfed	not_crossed	natal
HF-46425	f	9/18/2009 12:00	alive	5/17/2009	124	EPSG:31466	3505811.25	5426310	3505838	5426452	unfed	not_crossed	natal
HF-46425	f	9/20/2009 12:00	alive	5/17/2009	126	EPSG:31466	3507128.5	5425179	3505838	5426452	unfed	not_crossed	forays
HF-46425	f	9/21/2009 12:00	alive	5/17/2009	127	EPSG:31466	3505815.5	5426309.5	3505838	5426452	unfed	not_crossed	natal
HF-46425	f	9/22/2009 1:05	alive	5/17/2009	128	EPSG:31466	3505526.25	5427488	3505838	5426452	unfed	not_crossed	forays
HF-46425	f	9/27/2009 5:10	alive	5/17/2009	133	EPSG:31466	3505432.5	5426854.5	3505838	5426452	unfed	not_crossed	forays
HF-46425	f	9/28/2009 12:00	alive	5/17/2009	134	EPSG:31466	3505840.5	5426290.5	3505838	5426452	unfed	not_crossed	natal
HF-46425	f	10/3/2009 12:00	alive	5/17/2009	139	EPSG:31466	3507120.75	5425178.5	3505838	5426452	unfed	not_crossed	dispersal
HF-46425	f	10/4/2009 12:00	alive	5/17/2009	140	EPSG:31466	3507131	5425185.5	3505838	5426452	unfed	not_crossed	dispersal
HF-46425	f	10/6/2009 12:00	alive	5/17/2009	142	EPSG:31466	3507101	5425144	3505838	5426452	unfed	not_crossed	dispersal
HF-46425	f	10/7/2009 12:00	alive	5/17/2009	143	EPSG:31466	3507101.75	5425141	3505838	5426452	unfed	not_crossed	dispersal
HF-46425	f	10/9/2009 12:00	alive	5/17/2009	145	EPSG:31466	3507133	5425183.5	3505838	5426452	unfed	not_crossed	dispersal
HF-46425	f	10/10/2009 1:20	alive	5/17/2009	146	EPSG:31466	3507077.25	5425241.5	3505838	5426452	unfed	not_crossed	dispersal
HF-46425	f	10/11/2009 12:00	alive	5/17/2009	147	EPSG:31466	3507133.75	5425186	3505838	5426452	unfed	not_crossed	dispersal
HF-46425	f	10/15/2009 20:20	alive	5/17/2009	151	EPSG:31466	3506596	5425449.5	3505838	5426452	unfed	not_crossed	dispersal
HF-46425	f	10/17/2009 12:00	alive	5/17/2009	153	EPSG:31466	3507117	5425180.5	3505838	5426452	unfed	not_crossed	dispersal
HF-46425	f	10/18/2009 20:10	alive	5/17/2009	154	EPSG:31466	3505544	5427019	3505838	5426452	unfed	not_crossed	dispersal
HF-46425	f	10/26/2009 18:20	alive	5/17/2009	162	EPSG:31466	3506566.5	5425437.5	3505838	5426452	unfed	not_crossed	dispersal
HF-46425	f	10/30/2009 19:48	alive	5/17/2009	166	EPSG:31466	3506582	5425408	3505838	5426452	unfed	not_crossed	dispersal
HF-46425	f	11/1/2009 19:50	alive	5/17/2009	168	EPSG:31466	3507137.75	5425180.5	3505838	5426452	unfed	not_crossed	dispersal
HF-46425	f	11/3/2009 20:25	alive	5/17/2009	170	EPSG:31466	3507063	5425206.5	3505838	5426452	unfed	not_crossed	dispersal
HF-46425	f	11/10/2009 20:45	alive	5/17/2009	177	EPSG:31466	3506017.75	5425597	3505838	5426452	unfed	not_crossed	dispersal
HF-46425	f	11/12/2009 18:10	alive	5/17/2009	179	EPSG:31466	3506580.25	5425462	3505838	5426452	unfed	not_crossed	dispersal
HF-46425	f	11/13/2009 12:00	alive	5/17/2009	180	EPSG:31466	3507118.75	5425179.5	3505838	5426452	unfed	not_crossed	dispersal
HF-46425	f	11/15/2009 19:00	alive	5/17/2009	182	EPSG:31466	3507141.25	5424821.5	3505838	5426452	unfed	not_crossed	dispersal
HF-46425	f	11/18/2009 11:30	alive	5/17/2009	185	EPSG:31466	3507089.75	5425177	3505838	5426452	unfed	not_crossed	dispersal
HF-46425	f	11/21/2009 12:00	alive	5/17/2009	188	EPSG:31466	3507119	5425181	3505838	5426452	unfed	not_crossed	dispersal
HF-46425	f	11/22/2009 20:54	alive	5/17/2009	189	EPSG:31466	3506320	5425515.5	3505838	5426452	unfed	not_crossed	dispersal
HF-46425	f	11/25/2009 18:30	alive	5/17/2009	192	EPSG:31466	3507321.75	5424629	3505838	5426452	unfed	not_crossed	dispersal
HF-46425	f	11/26/2009 12:00	alive	5/17/2009	193	EPSG:31466	3507118.5	5425178.5	3505838	5426452	unfed	not_crossed	dispersal
HF-46425	f	12/3/2009 3:40	alive	5/17/2009	200	EPSG:31466	3506033	5425573	3505838	5426452	unfed	not_crossed	dispersal
HF-46425	f	12/6/2009 6:25	alive	5/17/2009	203	EPSG:31466	3507141.75	5425189.5	3505838	5426452	unfed	not_crossed	dispersal
HF-46425	f	12/9/2009 19:00	alive	5/17/2009	206	EPSG:31466	3506036.75	5425590.5	3505838	5426452	unfed	not_crossed	dispersal
HF-46425	f	12/11/2009 12:00	alive	5/17/2009	208	EPSG:31466	3507119.5	5425178.5	3505838	5426452	unfed	not_crossed	dispersal
HF-46425	f	12/19/2009 17:30	alive	5/17/2009	216	EPSG:31466	3507135.5	5425191	3505838	5426452	unfed	not_crossed	dispersal
HF-46425	f	12/20/2009 12:00	alive	5/17/2009	217	EPSG:31466	3507119.75	5425180	3505838	5426452	unfed	not_crossed	dispersal
HF-46425	f	1/4/2010 21:50	alive	5/17/2009	232	EPSG:31466	3506436.25	5425285	3505838	5426452	unfed	not_crossed	dispersal
HF-46425	f	1/22/2010 10:15	alive	5/17/2009	250	EPSG:31466	3507359.75	5424711	3505838	5426452	unfed	not_crossed	dispersal
HF-46426	f	6/21/2009 12:00	alive	5/21/2009	31	EPSG:31466	3505282.5	5426791.5	3505283	5426792	unfed	not_crossed	natal
HF-46426	f	6/25/2009 12:00	alive	5/21/2009	35	EPSG:31466	3505308.25	5426698.5	3505283	5426792	unfed	not_crossed	natal
HF-46426	f	6/26/2009 12:00	alive	5/21/2009	36	EPSG:31466	3505262.5	5426796.5	3505283	5426792	unfed	not_crossed	natal
HF-46426	f	7/2/2009 2:30	alive	5/21/2009	42	EPSG:31466	3505295.25	5426612.5	3505283	5426792	unfed	not_crossed	natal
HF-46426	f	7/8/2009 0:00	dead	5/21/2009	48	EPSG:31466	3504837.75	5426405	3505283	5426792	unfed	not_crossed	dispersal
HF-46493	m	6/30/2009 15:00	alive	5/23/2009	38	EPSG:31466	3509201.75	5425758	3509202	5425758	unfed	not_crossed	natal
HF-46493	m	7/2/2009 22:55	alive	5/23/2009	40	EPSG:31466	3509206.5	5425757.5	3509202	5425758	unfed	not_crossed	natal
HF-46493	m	7/3/2009 12:00	alive	5/23/2009	41	EPSG:31466	3509157.75	5425759	3509202	5425758	unfed	not_crossed	natal
HF-46493	m	7/9/2009 1:20	alive	5/23/2009	47	EPSG:31466	3509217.5	5425758	3509202	5425758	unfed	not_crossed	natal
HF-46493	m	7/10/2009 23:20	alive	5/23/2009	48	EPSG:31466	3509204.25	5425763	3509202	5425758	unfed	not_crossed	natal
HF-46493	m	7/14/2009 21:55	alive	5/23/2009	52	EPSG:31466	3509253	5425734	3509202	5425758	unfed	not_crossed	natal
HF-46493	m	7/22/2009 2:30	alive	5/23/2009	60	EPSG:31466	3509287.5	5425791	3509202	5425758	unfed	not_crossed	natal
HF-46493	m	7/24/2009 22:35	alive	5/23/2009	62	EPSG:31466	3509378.75	5425879	3509202	5425758	unfed	not_crossed	natal
HF-46493	m	7/28/2009 1:05	alive	5/23/2009	66	EPSG:31466	3509041.25	5425797	3509202	5425758	unfed	not_crossed	natal
HF-46493	m	7/31/2009 0:05	alive	5/23/2009	69	EPSG:31466	3509283.5	5425717	3509202	5425758	unfed	not_crossed	natal
HF-46493	m	8/3/2009 20:00	alive	5/23/2009	72	EPSG:31466	3509260.5	5425668	3509202	5425758	unfed	not_crossed	natal
HF-46493	m	8/4/2009 0:30	alive	5/23/2009	73	EPSG:31466	3509431.5	5425709	3509202	5425758	unfed	not_crossed	natal
HF-46493	m	8/5/2009 22:50	alive	5/23/2009	74	EPSG:31466	3509697.75	5425771.5	3509202	5425758	unfed	not_crossed	forays
HF-46493	m	8/8/2009 0:15	alive	5/23/2009	77	EPSG:31466	3509207.25	5425911	3509202	5425758	unfed	not_crossed	natal
HF-46493	m	8/9/2009 23:50	alive	5/23/2009	78	EPSG:31466	3509248.5	5425951	3509202	5425758	unfed	not_crossed	natal
HF-46493	m	8/10/2009 16:45	alive	5/23/2009	79	EPSG:31466	3509247.5	5425668	3509202	5425758	unfed	not_crossed	natal
HF-46493	m	8/12/2009 4:45	alive	5/23/2009	81	EPSG:31466	3509375.5	5425678	3509202	5425758	unfed	not_crossed	natal
HF-46493	m	8/13/2009 13:30	alive	5/23/2009	82	EPSG:31466	3509225.75	5425598	3509202	5425758	unfed	not_crossed	natal
HF-46493	m	8/14/2009 1:00	alive	5/23/2009	83	EPSG:31466	3509624.75	5425870	3509202	5425758	unfed	not_crossed	forays
HF-46493	m	8/15/2009 23:15	alive	5/23/2009	84	EPSG:31466	3509300.75	5426019	3509202	5425758	unfed	not_crossed	natal
HF-46493	m	8/18/2009 4:50	alive	5/23/2009	87	EPSG:31466	3509253.25	5426024	3509202	5425758	unfed	not_crossed	natal
HF-46493	m	8/19/2009 0:35	alive	5/23/2009	88	EPSG:31466	3508655.75	5426229	3509202	5425758	unfed	not_crossed	forays
HF-46493	m	8/20/2009 22:25	alive	5/23/2009	89	EPSG:31466	3509242	5426040	3509202	5425758	unfed	not_crossed	natal
HF-46493	m	8/24/2009 3:45	alive	5/23/2009	93	EPSG:31466	3509343.25	5425672.5	3509202	5425758	unfed	not_crossed	natal
HF-46493	m	8/26/2009 4:40	alive	5/23/2009	95	EPSG:31466	3509283.75	5425676.5	3509202	5425758	unfed	not_crossed	natal
HF-46493	m	8/27/2009 22:40	alive	5/23/2009	96	EPSG:31466	3509398.75	5425660.5	3509202	5425758	unfed	not_crossed	natal
HF-46493	m	9/1/2009 21:03	alive	5/23/2009	101	EPSG:31466	3509401.5	5425704	3509202	5425758	unfed	not_crossed	natal
HF-46493	m	9/5/2009 0:20	alive	5/23/2009	105	EPSG:31466	3509361	5425683	3509202	5425758	unfed	not_crossed	natal
HF-46493	m	9/9/2009 2:35	alive	5/23/2009	109	EPSG:31466	3508715.75	5426137	3509202	5425758	unfed	not_crossed	forays
HF-46493	m	9/11/2009 6:05	alive	5/23/2009	111	EPSG:31466	3508575.25	5426372	3509202	5425758	unfed	not_crossed	forays
HF-46493	m	9/12/2009 23:25	alive	5/23/2009	112	EPSG:31466	3508667.5	5426291	3509202	5425758	unfed	not_crossed	forays
HF-46493	m	9/14/2009 12:00	alive	5/23/2009	114	EPSG:31466	3508564.25	5426364.5	3509202	5425758	unfed	not_crossed	forays
HF-46493	m	9/16/2009 12:00	alive	5/23/2009	116	EPSG:31466	3508566	5426365.5	3509202	5425758	unfed	not_crossed	forays
HF-46493	m	9/17/2009 3:55	alive	5/23/2009	117	EPSG:31466	3508667.5	5426140.5	3509202	5425758	unfed	not_crossed	forays
HF-46493	m	9/18/2009 12:00	alive	5/23/2009	118	EPSG:31466	3508565.75	5426368	3509202	5425758	unfed	not_crossed	forays
HF-46493	m	9/21/2009 12:00	alive	5/23/2009	121	EPSG:31466	3508563.5	5426370	3509202	5425758	unfed	not_crossed	forays
HF-46493	m	9/22/2009 20:55	alive	5/23/2009	122	EPSG:31466	3508619.75	5426210	3509202	5425758	unfed	not_crossed	forays
HF-46493	m	9/27/2009 4:20	alive	5/23/2009	127	EPSG:31466	3508578	5426365.5	3509202	5425758	unfed	not_crossed	forays
HF-46493	m	9/29/2009 7:20	alive	5/23/2009	129	EPSG:31466	3508557.5	5426385	3509202	5425758	unfed	not_crossed	forays
HF-46493	m	9/30/2009 12:00	alive	5/23/2009	130	EPSG:31466	3508560.25	5426370.5	3509202	5425758	unfed	not_crossed	forays
HF-46493	m	10/6/2009 12:00	alive	5/23/2009	136	EPSG:31466	3508560	5426368.5	3509202	5425758	unfed	not_crossed	forays
HF-46493	m	10/7/2009 12:00	alive	5/23/2009	137	EPSG:31466	3508559.75	5426367	3509202	5425758	unfed	not_crossed	forays
HF-46493	m	10/9/2009 12:00	alive	5/23/2009	139	EPSG:31466	3508560	5426365	3509202	5425758	unfed	not_crossed	forays
HF-46493	m	10/11/2009 1:10	alive	5/23/2009	141	EPSG:31466	3508860	5426247	3509202	5425758	unfed	not_crossed	forays
HF-46493	m	10/14/2009 12:00	alive	5/23/2009	144	EPSG:31466	3508560.5	5426363	3509202	5425758	unfed	not_crossed	forays
HF-46493	m	10/15/2009 19:40	alive	5/23/2009	145	EPSG:31466	3508862.75	5425966	3509202	5425758	unfed	not_crossed	forays
HF-46493	m	10/17/2009 12:00	alive	5/23/2009	147	EPSG:31466	3508562.25	5426363.5	3509202	5425758	unfed	not_crossed	forays
HF-46493	m	10/18/2009 19:40	alive	5/23/2009	148	EPSG:31466	3509007.75	5426140.5	3509202	5425758	unfed	not_crossed	forays
HF-46493	m	10/20/2009 12:00	alive	5/23/2009	150	EPSG:31466	3508564.5	5426362.5	3509202	5425758	unfed	not_crossed	forays
HF-46493	m	10/26/2009 18:50	alive	5/23/2009	156	EPSG:31466	3508863.75	5426081	3509202	5425758	unfed	not_crossed	forays
HF-46493	m	10/30/2009 20:07	alive	5/23/2009	160	EPSG:31466	3508815	5426302.5	3509202	5425758	unfed	not_crossed	forays
HF-46493	m	11/1/2009 20:14	alive	5/23/2009	162	EPSG:31466	3508735.75	5425669	3509202	5425758	unfed	not_crossed	forays
HF-46493	m	11/3/2009 12:00	alive	5/23/2009	164	EPSG:31466	3508566	5426363.5	3509202	5425758	unfed	not_crossed	forays
HF-46493	m	11/10/2009 20:07	alive	5/23/2009	171	EPSG:31466	3508854.75	5426292	3509202	5425758	unfed	not_crossed	forays
HF-46493	m	11/12/2009 17:43	alive	5/23/2009	173	EPSG:31466	3508644.75	5426182.5	3509202	5425758	unfed	not_crossed	forays
HF-46493	m	11/13/2009 12:00	alive	5/23/2009	174	EPSG:31466	3508567.25	5426365	3509202	5425758	unfed	not_crossed	forays
HF-46493	m	11/15/2009 17:42	alive	5/23/2009	176	EPSG:31466	3508713.5	5426175	3509202	5425758	unfed	not_crossed	forays
HF-46493	m	11/17/2009 19:50	alive	5/23/2009	178	EPSG:31466	3509167.5	5426048.5	3509202	5425758	unfed	not_crossed	natal
HF-46493	m	11/18/2009 10:00	alive	5/23/2009	179	EPSG:31466	3508553	5426366.5	3509202	5425758	unfed	not_crossed	dispersal
HF-46493	m	11/21/2009 12:00	alive	5/23/2009	182	EPSG:31466	3508567.25	5426367	3509202	5425758	unfed	not_crossed	dispersal
HF-46493	m	11/25/2009 17:50	alive	5/23/2009	186	EPSG:31466	3508867.5	5426274.5	3509202	5425758	unfed	not_crossed	dispersal
HF-46493	m	12/2/2009 7:25	alive	5/23/2009	193	EPSG:31466	3508592.25	5426367.5	3509202	5425758	unfed	not_crossed	dispersal
HF-46493	m	12/3/2009 4:15	alive	5/23/2009	194	EPSG:31466	3508929	5426201.5	3509202	5425758	unfed	not_crossed	dispersal
HF-46493	m	12/6/2009 6:44	alive	5/23/2009	197	EPSG:31466	3508907.25	5426338	3509202	5425758	unfed	not_crossed	dispersal
HF-46493	m	12/9/2009 19:15	alive	5/23/2009	200	EPSG:31466	3508895	5426270	3509202	5425758	unfed	not_crossed	dispersal
HF-46493	m	12/11/2009 20:35	alive	5/23/2009	202	EPSG:31466	3508649	5426136	3509202	5425758	unfed	not_crossed	dispersal
HF-46493	m	12/19/2009 18:00	alive	5/23/2009	210	EPSG:31466	3508691.25	5426103.5	3509202	5425758	unfed	not_crossed	dispersal
HF-46493	m	12/20/2009 12:00	alive	5/23/2009	211	EPSG:31466	3508564.25	5426366.5	3509202	5425758	unfed	not_crossed	dispersal
HF-46493	m	1/4/2010 22:45	alive	5/23/2009	226	EPSG:31466	3508644.75	5426208	3509202	5425758	unfed	not_crossed	dispersal
HF-46493	m	1/20/2010 19:40	alive	5/23/2009	242	EPSG:31466	3508585.25	5426363.5	3509202	5425758	unfed	not_crossed	dispersal
HF-46493	m	2/7/2010 0:00	dead	5/23/2009	260	EPSG:31466	3508501.5	5426387.5	3509202	5425758	unfed	not_crossed	dispersal
HF-46495	m	6/28/2009 12:00	alive	5/26/2009	33	EPSG:31466	3508654	5425804.5	3508654	5425805	unfed	not_crossed	natal
HF-46495	m	7/2/2009 22:25	alive	5/26/2009	37	EPSG:31466	3508620.75	5425859.5	3508654	5425805	unfed	not_crossed	natal
HF-46495	m	7/3/2009 12:00	alive	5/26/2009	38	EPSG:31466	3508770.5	5425845	3508654	5425805	unfed	not_crossed	natal
HF-46495	m	7/10/2009 0:50	alive	5/26/2009	45	EPSG:31466	3508616.25	5425901.5	3508654	5425805	unfed	not_crossed	natal
HF-46495	m	7/14/2009 0:55	alive	5/26/2009	49	EPSG:31466	3508594.5	5425858	3508654	5425805	unfed	not_crossed	natal
HF-46495	m	7/22/2009 2:10	alive	5/26/2009	57	EPSG:31466	3508620.75	5425842.5	3508654	5425805	unfed	not_crossed	natal
HF-46495	m	7/24/2009 22:20	alive	5/26/2009	59	EPSG:31466	3508613	5425830	3508654	5425805	unfed	not_crossed	natal
HF-46495	m	7/28/2009 0:35	alive	5/26/2009	63	EPSG:31466	3508622.5	5425895.5	3508654	5425805	unfed	not_crossed	natal
HF-46495	m	7/31/2009 5:40	alive	5/26/2009	66	EPSG:31466	3508602.25	5425861	3508654	5425805	unfed	not_crossed	natal
HF-46495	m	8/3/2009 19:00	alive	5/26/2009	69	EPSG:31466	3508783	5425861.5	3508654	5425805	unfed	not_crossed	natal
HF-46495	m	8/4/2009 0:15	alive	5/26/2009	70	EPSG:31466	3508737.25	5425625.5	3508654	5425805	unfed	not_crossed	natal
HF-46495	m	8/5/2009 23:45	alive	5/26/2009	71	EPSG:31466	3508612.75	5425860.5	3508654	5425805	unfed	not_crossed	natal
HF-46495	m	8/9/2009 23:25	alive	5/26/2009	75	EPSG:31466	3508637	5425929	3508654	5425805	unfed	not_crossed	natal
HF-46495	m	8/10/2009 16:30	alive	5/26/2009	76	EPSG:31466	3508637.75	5425861.5	3508654	5425805	unfed	not_crossed	natal
HF-46495	m	8/12/2009 4:15	alive	5/26/2009	78	EPSG:31466	3508754.25	5425906	3508654	5425805	unfed	not_crossed	natal
HF-46495	m	8/13/2009 13:45	alive	5/26/2009	79	EPSG:31466	3508657.25	5425855.5	3508654	5425805	unfed	not_crossed	natal
HF-46495	m	8/14/2009 0:40	alive	5/26/2009	80	EPSG:31466	3508869	5425926.5	3508654	5425805	unfed	not_crossed	natal
HF-46495	m	8/15/2009 22:40	alive	5/26/2009	81	EPSG:31466	3508633.25	5425858	3508654	5425805	unfed	not_crossed	natal
HF-46495	m	8/18/2009 15:00	alive	5/26/2009	84	EPSG:31466	3508652.5	5425796.5	3508654	5425805	unfed	not_crossed	natal
HF-46495	m	8/19/2009 4:15	alive	5/26/2009	85	EPSG:31466	3508647.25	5425794.5	3508654	5425805	unfed	not_crossed	natal
HF-46495	m	8/20/2009 21:50	alive	5/26/2009	86	EPSG:31466	3508586.75	5425858	3508654	5425805	unfed	not_crossed	natal
HF-46495	m	8/25/2009 3:15	alive	5/26/2009	91	EPSG:31466	3508480.5	5425692	3508654	5425805	unfed	not_crossed	natal
HF-46495	m	8/26/2009 4:30	alive	5/26/2009	92	EPSG:31466	3508606	5425855	3508654	5425805	unfed	not_crossed	natal
HF-46495	m	8/27/2009 22:20	alive	5/26/2009	93	EPSG:31466	3508621.5	5425884.5	3508654	5425805	unfed	not_crossed	natal
HF-46495	m	9/1/2009 21:31	alive	5/26/2009	98	EPSG:31466	3508635.5	5425858	3508654	5425805	unfed	not_crossed	natal
HF-46495	m	9/5/2009 1:30	alive	5/26/2009	102	EPSG:31466	3508276.25	5425974.5	3508654	5425805	unfed	not_crossed	forays
HF-46495	m	9/9/2009 3:11	alive	5/26/2009	106	EPSG:31466	3508346.25	5425769.5	3508654	5425805	unfed	not_crossed	forays
HF-46495	m	9/11/2009 6:25	alive	5/26/2009	108	EPSG:31466	3508740.25	5425819.5	3508654	5425805	unfed	not_crossed	natal
HF-46495	m	9/12/2009 12:00	alive	5/26/2009	109	EPSG:31466	3508621.75	5425848	3508654	5425805	unfed	not_crossed	natal
HF-46495	m	9/13/2009 0:15	alive	5/26/2009	110	EPSG:31466	3508205	5425763.5	3508654	5425805	unfed	not_crossed	forays
HF-46495	m	9/14/2009 20:38	alive	5/26/2009	111	EPSG:31466	3508194	5425853.5	3508654	5425805	unfed	not_crossed	forays
HF-46495	m	9/16/2009 12:00	alive	5/26/2009	113	EPSG:31466	3508657.75	5425863.5	3508654	5425805	unfed	not_crossed	natal
HF-46495	m	9/17/2009 4:04	alive	5/26/2009	114	EPSG:31466	3508288.75	5425976	3508654	5425805	unfed	not_crossed	forays
HF-46495	m	9/18/2009 23:59	alive	5/26/2009	115	EPSG:31466	3508763.5	5425805.5	3508654	5425805	unfed	not_crossed	natal
HF-46495	m	9/21/2009 12:00	alive	5/26/2009	118	EPSG:31466	3508656.75	5425867	3508654	5425805	unfed	not_crossed	natal
HF-46495	m	9/22/2009 20:30	alive	5/26/2009	119	EPSG:31466	3508780.75	5425928	3508654	5425805	unfed	not_crossed	natal
HF-46495	m	9/27/2009 3:58	alive	5/26/2009	124	EPSG:31466	3508703	5426047.5	3508654	5425805	unfed	not_crossed	natal
HF-46495	m	9/29/2009 7:00	alive	5/26/2009	126	EPSG:31466	3508710.75	5426041	3508654	5425805	unfed	not_crossed	natal
HF-46495	m	10/1/2009 12:00	alive	5/26/2009	128	EPSG:31466	3508655.25	5425860	3508654	5425805	unfed	not_crossed	natal
HF-46495	m	10/6/2009 19:50	alive	5/26/2009	133	EPSG:31466	3508200.25	5425765	3508654	5425805	unfed	not_crossed	forays
HF-46495	m	10/7/2009 12:00	alive	5/26/2009	134	EPSG:31466	3508654	5425865	3508654	5425805	unfed	not_crossed	natal
HF-46495	m	10/9/2009 12:00	alive	5/26/2009	136	EPSG:31466	3508933.5	5425817.5	3508654	5425805	unfed	not_crossed	natal
HF-46495	m	10/11/2009 0:55	alive	5/26/2009	138	EPSG:31466	3508998	5425875	3508654	5425805	unfed	not_crossed	forays
HF-46495	m	10/14/2009 12:00	alive	5/26/2009	141	EPSG:31466	3508606.75	5425455.5	3508654	5425805	unfed	not_crossed	forays
HF-46495	m	10/15/2009 19:52	alive	5/26/2009	142	EPSG:31466	3509098.75	5425974.5	3508654	5425805	unfed	not_crossed	forays
HF-46495	m	10/17/2009 12:00	alive	5/26/2009	144	EPSG:31466	3508588	5425430	3508654	5425805	unfed	not_crossed	forays
HF-46495	m	10/18/2009 19:35	alive	5/26/2009	145	EPSG:31466	3508658	5426185.5	3508654	5425805	unfed	not_crossed	forays
HF-46495	m	10/20/2009 12:00	alive	5/26/2009	147	EPSG:31466	3508597	5425428	3508654	5425805	unfed	not_crossed	forays
HF-46495	m	10/26/2009 18:40	alive	5/26/2009	153	EPSG:31466	3508658	5426185.5	3508654	5425805	unfed	not_crossed	forays
HF-46495	m	10/30/2009 20:28	alive	5/26/2009	157	EPSG:31466	3508060.5	5425619	3508654	5425805	unfed	not_crossed	forays
HF-46495	m	11/1/2009 20:30	alive	5/26/2009	159	EPSG:31466	3509136.75	5425597.5	3508654	5425805	unfed	not_crossed	forays
HF-46495	m	11/3/2009 12:00	alive	5/26/2009	161	EPSG:31466	3508627.5	5425364.5	3508654	5425805	unfed	not_crossed	forays
HF-46495	m	11/10/2009 20:27	alive	5/26/2009	168	EPSG:31466	3508972.25	5425631.5	3508654	5425805	unfed	not_crossed	forays
HF-46495	m	11/12/2009 17:55	alive	5/26/2009	170	EPSG:31466	3508759	5425622	3508654	5425805	unfed	not_crossed	natal
HF-46495	m	11/13/2009 12:00	alive	5/26/2009	171	EPSG:31466	3508624.75	5425362.5	3508654	5425805	unfed	not_crossed	forays
HF-46495	m	11/15/2009 17:45	alive	5/26/2009	173	EPSG:31466	3508729.5	5425676.5	3508654	5425805	unfed	not_crossed	natal
HF-46495	m	11/17/2009 19:30	alive	5/26/2009	175	EPSG:31466	3509382.75	5425634.5	3508654	5425805	unfed	not_crossed	forays
HF-46495	m	11/18/2009 10:30	alive	5/26/2009	176	EPSG:31466	3509394.75	5425676.5	3508654	5425805	unfed	not_crossed	forays
HF-46495	m	11/21/2009 12:00	alive	5/26/2009	179	EPSG:31466	3509174.25	5425728	3508654	5425805	unfed	not_crossed	forays
HF-46495	m	11/25/2009 18:07	alive	5/26/2009	183	EPSG:31466	3508832	5425585	3508654	5425805	unfed	not_crossed	natal
HF-46495	m	11/26/2009 12:00	alive	5/26/2009	184	EPSG:31466	3509185.5	5425633	3508654	5425805	unfed	not_crossed	forays
HF-46495	m	12/1/2009 12:00	alive	5/26/2009	189	EPSG:31466	3509169.5	5425637	3508654	5425805	unfed	not_crossed	forays
HF-46495	m	12/2/2009 7:36	alive	5/26/2009	190	EPSG:31466	3509238.5	5425664	3508654	5425805	unfed	not_crossed	forays
HF-46495	m	12/3/2009 4:30	alive	5/26/2009	191	EPSG:31466	3508946.75	5425582	3508654	5425805	unfed	not_crossed	forays
HF-46495	m	12/6/2009 7:05	alive	5/26/2009	194	EPSG:31466	3509229.25	5425659.5	3508654	5425805	unfed	not_crossed	forays
HF-46495	m	12/9/2009 19:30	alive	5/26/2009	197	EPSG:31466	3509330	5425682.5	3508654	5425805	unfed	not_crossed	forays
HF-46495	m	12/11/2009 20:45	alive	5/26/2009	199	EPSG:31466	3508872.25	5425594.5	3508654	5425805	unfed	not_crossed	forays
HF-46495	m	12/19/2009 18:15	alive	5/26/2009	207	EPSG:31466	3508928	5425453	3508654	5425805	unfed	not_crossed	forays
HF-46495	m	12/20/2009 12:00	alive	5/26/2009	208	EPSG:31466	3509172.75	5425626.5	3508654	5425805	unfed	not_crossed	forays
HF-46495	m	1/4/2010 22:20	alive	5/26/2009	223	EPSG:31466	3508492.75	5425551	3508654	5425805	unfed	not_crossed	forays
HF-46495	m	1/20/2010 19:20	alive	5/26/2009	239	EPSG:31466	3508587.5	5425547.5	3508654	5425805	unfed	not_crossed	natal
HF-46495	m	2/7/2010 21:20	alive	5/26/2009	257	EPSG:31466	3509544.25	5425563.5	3508654	5425805	unfed	not_crossed	dispersal
HF-46495	m	2/8/2010 12:00	alive	5/26/2009	258	EPSG:31466	3509257	5425639.5	3508654	5425805	unfed	not_crossed	dispersal
HF-46495	m	3/2/2010 20:35	alive	5/26/2009	280	EPSG:31466	3509219.75	5425856.5	3508654	5425805	unfed	not_crossed	dispersal
HF-46495	m	3/4/2010 12:00	alive	5/26/2009	282	EPSG:31466	3509226	5425641.5	3508654	5425805	unfed	not_crossed	dispersal
HF-46495	m	3/17/2010 21:15	alive	5/26/2009	295	EPSG:31466	3509446.5	5425686	3508654	5425805	unfed	not_crossed	dispersal
HF-46495	m	3/18/2010 23:54	alive	5/26/2009	296	EPSG:31466	3509209	5425751	3508654	5425805	unfed	not_crossed	dispersal
HF-46495	m	3/20/2010 12:00	alive	5/26/2009	298	EPSG:31466	3509256.25	5425633.5	3508654	5425805	unfed	not_crossed	dispersal
HF-46495	m	4/1/2010 11:00	alive	5/26/2009	310	EPSG:31466	3509219.75	5425727.5	3508654	5425805	unfed	not_crossed	dispersal
HF-46497	m	6/24/2009 12:00	alive	5/26/2009	29	EPSG:31466	3504225.5	5427187	3504225	5427187	unfed	not_crossed	natal
HF-46497	m	6/26/2009 12:00	alive	5/26/2009	31	EPSG:31466	3504223.75	5427184	3504225	5427187	unfed	not_crossed	natal
HF-46497	m	7/1/2009 1:00	alive	5/26/2009	36	EPSG:31466	3504231.25	5427197.5	3504225	5427187	unfed	not_crossed	natal
HF-46497	m	7/3/2009 12:00	alive	5/26/2009	38	EPSG:31466	3504225.25	5427189.5	3504225	5427187	unfed	not_crossed	natal
HF-46497	m	7/8/2009 22:25	alive	5/26/2009	43	EPSG:31466	3504230.25	5427198.5	3504225	5427187	unfed	not_crossed	natal
HF-46497	m	7/11/2009 0:30	alive	5/26/2009	46	EPSG:31466	3504223	5427194.5	3504225	5427187	unfed	not_crossed	natal
HF-46497	m	7/13/2009 22:45	alive	5/26/2009	48	EPSG:31466	3504231.25	5427197.5	3504225	5427187	unfed	not_crossed	natal
HF-46497	m	7/15/2009 0:50	alive	5/26/2009	50	EPSG:31466	3504233.5	5427198.5	3504225	5427187	unfed	not_crossed	natal
HF-46497	m	7/21/2009 22:55	alive	5/26/2009	56	EPSG:31466	3504231.25	5427198.5	3504225	5427187	unfed	not_crossed	natal
HF-46497	m	7/25/2009 23:25	alive	5/26/2009	60	EPSG:31466	3504232.25	5427198.5	3504225	5427187	unfed	not_crossed	natal
HF-46497	m	7/29/2009 0:35	alive	5/26/2009	64	EPSG:31466	3504233.5	5427198.5	3504225	5427187	unfed	not_crossed	natal
HF-46497	m	7/30/2009 5:50	alive	5/26/2009	65	EPSG:31466	3504233.5	5427199.5	3504225	5427187	unfed	not_crossed	natal
HF-46497	m	8/4/2009 23:35	alive	5/26/2009	70	EPSG:31466	3504233.5	5427200.5	3504225	5427187	unfed	not_crossed	natal
HF-46497	m	8/7/2009 0:35	alive	5/26/2009	73	EPSG:31466	3504313.5	5427209	3504225	5427187	unfed	not_crossed	natal
HF-46497	m	8/8/2009 18:30	alive	5/26/2009	74	EPSG:31466	3504228	5427183.5	3504225	5427187	unfed	not_crossed	natal
HF-46497	m	8/9/2009 2:20	alive	5/26/2009	75	EPSG:31466	3504219	5427165	3504225	5427187	unfed	not_crossed	natal
HF-46497	m	8/10/2009 22:25	alive	5/26/2009	76	EPSG:31466	3504358.5	5427293	3504225	5427187	unfed	not_crossed	natal
HF-46497	m	8/12/2009 21:50	alive	5/26/2009	78	EPSG:31466	3504331	5427373	3504225	5427187	unfed	not_crossed	natal
HF-46497	m	8/13/2009 14:15	alive	5/26/2009	79	EPSG:31466	3504227.75	5427184.5	3504225	5427187	unfed	not_crossed	natal
HF-46497	m	8/15/2009 0:40	alive	5/26/2009	81	EPSG:31466	3504232.25	5427200.5	3504225	5427187	unfed	not_crossed	natal
HF-46497	m	8/16/2009 21:15	alive	5/26/2009	82	EPSG:31466	3504354.5	5427303.5	3504225	5427187	unfed	not_crossed	natal
HF-46497	m	8/18/2009 12:00	alive	5/26/2009	84	EPSG:31466	3504227.5	5427186.5	3504225	5427187	unfed	not_crossed	natal
HF-46497	m	8/19/2009 5:30	alive	5/26/2009	85	EPSG:31466	3504232.25	5427199.5	3504225	5427187	unfed	not_crossed	natal
HF-46497	m	8/21/2009 23:00	alive	5/26/2009	87	EPSG:31466	3504233.5	5427199.5	3504225	5427187	unfed	not_crossed	natal
HF-46497	m	8/25/2009 2:40	alive	5/26/2009	91	EPSG:31466	3504233.5	5427198.5	3504225	5427187	unfed	not_crossed	natal
HF-46497	m	8/27/2009 5:40	alive	5/26/2009	93	EPSG:31466	3504233.5	5427199.5	3504225	5427187	unfed	not_crossed	natal
HF-46497	m	9/1/2009 23:13	alive	5/26/2009	98	EPSG:31466	3504232.25	5427198.5	3504225	5427187	unfed	not_crossed	natal
HF-46497	m	9/4/2009 21:16	alive	5/26/2009	101	EPSG:31466	3504221	5427111.5	3504225	5427187	unfed	not_crossed	natal
HF-46497	m	9/9/2009 4:55	alive	5/26/2009	106	EPSG:31466	3504234.5	5427174	3504225	5427187	unfed	not_crossed	natal
HF-46497	m	9/11/2009 4:15	alive	5/26/2009	108	EPSG:31466	3504041.5	5427158.5	3504225	5427187	unfed	not_crossed	natal
HF-46497	m	9/12/2009 21:30	alive	5/26/2009	109	EPSG:31466	3504354.5	5427295	3504225	5427187	unfed	not_crossed	natal
HF-46497	m	9/14/2009 23:20	alive	5/26/2009	111	EPSG:31466	3504232.25	5427198.5	3504225	5427187	unfed	not_crossed	natal
HF-46497	m	9/16/2009 12:00	alive	5/26/2009	113	EPSG:31466	3504226.75	5427185.5	3504225	5427187	unfed	not_crossed	natal
HF-46497	m	9/17/2009 4:55	alive	5/26/2009	114	EPSG:31466	3504367.75	5427279.5	3504225	5427187	unfed	not_crossed	natal
HF-46497	m	9/18/2009 20:55	alive	5/26/2009	115	EPSG:31466	3504381.25	5427235.5	3504225	5427187	unfed	not_crossed	natal
HF-46497	m	9/21/2009 12:00	alive	5/26/2009	118	EPSG:31466	3504223.25	5427185	3504225	5427187	unfed	not_crossed	natal
HF-46497	m	9/22/2009 0:20	alive	5/26/2009	119	EPSG:31466	3504372	5427285	3504225	5427187	unfed	not_crossed	natal
HF-46497	m	9/27/2009 5:30	alive	5/26/2009	124	EPSG:31466	3504388.75	5427296	3504225	5427187	unfed	not_crossed	natal
HF-46497	m	9/28/2009 12:00	alive	5/26/2009	125	EPSG:31466	3504222.25	5427186.5	3504225	5427187	unfed	not_crossed	natal
HF-46497	m	9/29/2009 6:15	alive	5/26/2009	126	EPSG:31466	3504335.5	5427331.5	3504225	5427187	unfed	not_crossed	natal
HF-46497	m	9/30/2009 12:00	alive	5/26/2009	127	EPSG:31466	3504222.5	5427187.5	3504225	5427187	unfed	not_crossed	natal
HF-46497	m	10/1/2009 12:00	alive	5/26/2009	128	EPSG:31466	3504223.25	5427187.5	3504225	5427187	unfed	not_crossed	natal
HF-46497	m	10/2/2009 23:05	alive	5/26/2009	129	EPSG:31466	3505434	5427564	3504225	5427187	unfed	not_crossed	forays
HF-46497	m	10/3/2009 12:00	alive	5/26/2009	130	EPSG:31466	3504223.5	5427188.5	3504225	5427187	unfed	not_crossed	natal
HF-46497	m	10/5/2009 12:00	alive	5/26/2009	132	EPSG:31466	3504222.25	5427188.5	3504225	5427187	unfed	not_crossed	natal
HF-46497	m	10/6/2009 12:00	alive	5/26/2009	133	EPSG:31466	3504222.25	5427185.5	3504225	5427187	unfed	not_crossed	natal
HF-46497	m	10/11/2009 20:40	alive	5/26/2009	138	EPSG:31466	3504894.25	5414982.5	3504225	5427187	unfed	not_crossed	dispersal
HF-46497	m	10/14/2009 20:50	alive	5/26/2009	141	EPSG:31466	3502753.5	5415707	3504225	5427187	unfed	not_crossed	dispersal
HF-46497	m	10/16/2009 12:00	alive	5/26/2009	143	EPSG:31466	3504886.25	5415697	3504225	5427187	unfed	not_crossed	dispersal
HF-46497	m	10/17/2009 21:21	alive	5/26/2009	144	EPSG:31466	3504870	5415459	3504225	5427187	unfed	not_crossed	dispersal
HF-46497	m	10/19/2009 12:00	alive	5/26/2009	146	EPSG:31466	3504887.75	5415681	3504225	5427187	unfed	not_crossed	dispersal
HF-46497	m	10/20/2009 21:10	alive	5/26/2009	147	EPSG:31466	3503619.5	5415142	3504225	5427187	unfed	not_crossed	dispersal
HF-46497	m	10/26/2009 0:00	dead	5/26/2009	153	EPSG:31466	3504867.75	5415479.5	3504225	5427187	unfed	not_crossed	dispersal
HF-46499	f	6/24/2009 12:00	alive	5/24/2009	31	EPSG:31466	3504721	5426918.5	3504721	5426918	unfed	not_crossed	natal
HF-46499	f	6/26/2009 12:00	alive	5/24/2009	33	EPSG:31466	3504716.5	5426918.5	3504721	5426918	unfed	not_crossed	natal
HF-46499	f	7/8/2009 0:20	alive	5/24/2009	45	EPSG:31466	3504690.25	5426919	3504721	5426918	unfed	not_crossed	natal
HF-46499	f	7/9/2009 22:25	alive	5/24/2009	46	EPSG:31466	3504747.75	5426922.5	3504721	5426918	unfed	not_crossed	natal
HF-46499	f	7/13/2009 1:50	alive	5/24/2009	50	EPSG:31466	3504719	5426922.5	3504721	5426918	unfed	not_crossed	natal
HF-46499	f	7/15/2009 0:20	alive	5/24/2009	52	EPSG:31466	3504807	5426922.5	3504721	5426918	unfed	not_crossed	natal
HF-46499	f	7/21/2009 23:40	alive	5/24/2009	58	EPSG:31466	3504909.5	5426868.5	3504721	5426918	unfed	not_crossed	natal
HF-46499	f	7/24/2009 23:30	alive	5/24/2009	61	EPSG:31466	3505024.75	5426838	3504721	5426918	unfed	not_crossed	forays
HF-46499	f	7/28/2009 3:10	alive	5/24/2009	65	EPSG:31466	3504909.5	5426893.5	3504721	5426918	unfed	not_crossed	natal
HF-46499	f	7/30/2009 2:50	alive	5/24/2009	67	EPSG:31466	3504909.5	5426893.5	3504721	5426918	unfed	not_crossed	natal
HF-46499	f	8/3/2009 16:00	alive	5/24/2009	71	EPSG:31466	3504748	5426920.5	3504721	5426918	unfed	not_crossed	natal
HF-46499	f	8/4/2009 2:05	alive	5/24/2009	72	EPSG:31466	3504987	5426854	3504721	5426918	unfed	not_crossed	natal
HF-46499	f	8/6/2009 0:30	alive	5/24/2009	74	EPSG:31466	3504931.25	5426924	3504721	5426918	unfed	not_crossed	natal
HF-46499	f	8/8/2009 2:25	alive	5/24/2009	76	EPSG:31466	3505046.25	5426962	3504721	5426918	unfed	not_crossed	forays
HF-46499	f	8/9/2009 21:55	alive	5/24/2009	77	EPSG:31466	3505152.25	5426857.5	3504721	5426918	unfed	not_crossed	forays
HF-46499	f	8/11/2009 21:30	alive	5/24/2009	79	EPSG:31466	3504666.75	5427316	3504721	5426918	unfed	not_crossed	forays
HF-46499	f	8/13/2009 22:45	alive	5/24/2009	81	EPSG:31466	3504715.25	5426922.5	3504721	5426918	unfed	not_crossed	natal
HF-46499	f	8/15/2009 23:54	alive	5/24/2009	83	EPSG:31466	3504834	5427311	3504721	5426918	unfed	not_crossed	forays
HF-46499	f	8/18/2009 2:25	alive	5/24/2009	86	EPSG:31466	3505067.75	5427273	3504721	5426918	unfed	not_crossed	forays
HF-46499	f	8/21/2009 23:45	alive	5/24/2009	89	EPSG:31466	3504719	5426922.5	3504721	5426918	unfed	not_crossed	natal
HF-46499	f	8/25/2009 3:20	alive	5/24/2009	93	EPSG:31466	3504719	5426922.5	3504721	5426918	unfed	not_crossed	natal
HF-46499	f	8/27/2009 5:25	alive	5/24/2009	95	EPSG:31466	3504686.5	5427260.5	3504721	5426918	unfed	not_crossed	forays
HF-46499	f	9/1/2009 23:57	alive	5/24/2009	100	EPSG:31466	3504699.25	5427330.5	3504721	5426918	unfed	not_crossed	forays
HF-46499	f	9/2/2009 0:02	alive	5/24/2009	101	EPSG:31466	3504521	5427485.5	3504721	5426918	unfed	not_crossed	forays
HF-46499	f	9/4/2009 22:25	alive	5/24/2009	103	EPSG:31466	3504735	5427415	3504721	5426918	unfed	not_crossed	forays
HF-46499	f	9/9/2009 4:30	alive	5/24/2009	108	EPSG:31466	3504916.75	5426843.5	3504721	5426918	unfed	not_crossed	natal
HF-46499	f	9/11/2009 5:15	alive	5/24/2009	110	EPSG:31466	3505033.75	5427275	3504721	5426918	unfed	not_crossed	forays
HF-46499	f	9/12/2009 22:12	alive	5/24/2009	111	EPSG:31466	3505395.25	5427091.5	3504721	5426918	unfed	not_crossed	forays
HF-46499	f	9/14/2009 23:05	alive	5/24/2009	113	EPSG:31466	3504916.75	5426910	3504721	5426918	unfed	not_crossed	natal
HF-46499	f	9/16/2009 12:00	alive	5/24/2009	115	EPSG:31466	3504721.5	5426917	3504721	5426918	unfed	not_crossed	natal
HF-46499	f	9/17/2009 5:10	alive	5/24/2009	116	EPSG:31466	3504737	5427402.5	3504721	5426918	unfed	not_crossed	forays
HF-46499	f	9/18/2009 22:25	alive	5/24/2009	117	EPSG:31466	3503330	5428441.5	3504721	5426918	unfed	not_crossed	forays
HF-46499	f	9/19/2009 14:00	alive	5/24/2009	118	EPSG:31466	3499184.5	5431477.5	3504721	5426918	unfed	not_crossed	forays
HF-46499	f	9/21/2009 23:54	alive	5/24/2009	120	EPSG:31466	3504365.25	5425470.5	3504721	5426918	unfed	not_crossed	forays
HF-46499	f	9/22/2009 0:04	alive	5/24/2009	121	EPSG:31466	3504446.25	5425631	3504721	5426918	unfed	not_crossed	forays
HF-46499	f	9/23/2009 12:00	alive	5/24/2009	122	EPSG:31466	3504751.75	5426923.5	3504721	5426918	unfed	not_crossed	natal
HF-46499	f	9/24/2009 12:00	alive	5/24/2009	123	EPSG:31466	3504755.5	5426879.5	3504721	5426918	unfed	not_crossed	natal
HF-46499	f	9/25/2009 3:30	alive	5/24/2009	124	EPSG:31466	3504644.25	5427143.5	3504721	5426918	unfed	not_crossed	natal
HF-46499	f	9/27/2009 5:15	alive	5/24/2009	126	EPSG:31466	3504715.75	5426921	3504721	5426918	unfed	not_crossed	natal
HF-46499	f	9/28/2009 12:00	alive	5/24/2009	127	EPSG:31466	3504755.5	5426874.5	3504721	5426918	unfed	not_crossed	natal
HF-46499	f	9/29/2009 6:35	alive	5/24/2009	128	EPSG:31466	3504624	5426986	3504721	5426918	unfed	not_crossed	natal
HF-46499	f	10/3/2009 12:00	alive	5/24/2009	132	EPSG:31466	3494200.25	5429879	3504721	5426918	unfed	not_crossed	dispersal
HF-46499	f	10/12/2009 0:45	alive	5/24/2009	141	EPSG:31466	3480663.75	5424882.5	3504721	5426918	unfed	not_crossed	dispersal
HF-46499	f	10/13/2009 20:30	alive	5/24/2009	142	EPSG:31466	3481067	5425360.5	3504721	5426918	unfed	not_crossed	dispersal
HF-46499	f	10/15/2009 12:00	alive	5/24/2009	144	EPSG:31466	3481367.5	5424970.5	3504721	5426918	unfed	not_crossed	dispersal
HF-46499	f	10/16/2009 21:05	alive	5/24/2009	145	EPSG:31466	3480865.25	5425141.5	3504721	5426918	unfed	not_crossed	dispersal
HF-46499	f	10/18/2009 21:45	alive	5/24/2009	147	EPSG:31466	3482647.25	5423668.5	3504721	5426918	unfed	not_crossed	dispersal
HF-46499	f	10/19/2009 21:16	alive	5/24/2009	148	EPSG:31466	3481426.75	5425314	3504721	5426918	unfed	not_crossed	dispersal
HF-46499	f	10/23/2009 0:00	dead	5/24/2009	152	EPSG:31466	3481566.25	5424921.5	3504721	5426918	unfed	not_crossed	dispersal
HF-46804	f	6/21/2009 12:00	alive	5/19/2009	33	EPSG:31466	3504616.75	5426201	3504617	5426201	unfed	not_crossed	natal
HF-46804	f	6/30/2009 23:10	alive	5/19/2009	42	EPSG:31466	3504586.5	5426206	3504617	5426201	unfed	not_crossed	natal
HF-46804	f	7/2/2009 23:45	alive	5/19/2009	44	EPSG:31466	3504684.5	5426306.5	3504617	5426201	unfed	not_crossed	natal
HF-46804	f	7/3/2009 0:25	alive	5/19/2009	45	EPSG:31466	3504614.25	5426202	3504617	5426201	unfed	not_crossed	natal
HF-46804	f	7/8/2009 22:35	alive	5/19/2009	50	EPSG:31466	3504615.25	5426202	3504617	5426201	unfed	not_crossed	natal
HF-46804	f	7/11/2009 0:10	alive	5/19/2009	53	EPSG:31466	3504570	5426205	3504617	5426201	unfed	not_crossed	natal
HF-46804	f	7/13/2009 23:35	alive	5/19/2009	55	EPSG:31466	3504588.5	5426206	3504617	5426201	unfed	not_crossed	natal
HF-46804	f	7/21/2009 21:20	alive	5/19/2009	63	EPSG:31466	3504530.75	5426090	3504617	5426201	unfed	not_crossed	natal
HF-46804	f	7/25/2009 0:50	alive	5/19/2009	67	EPSG:31466	3504570	5426205	3504617	5426201	unfed	not_crossed	natal
HF-46804	f	7/28/2009 1:55	alive	5/19/2009	70	EPSG:31466	3504565.75	5426262	3504617	5426201	unfed	not_crossed	natal
HF-46804	f	7/30/2009 4:30	alive	5/19/2009	72	EPSG:31466	3504761.5	5426145.5	3504617	5426201	unfed	not_crossed	natal
HF-46804	f	8/3/2009 15:00	alive	5/19/2009	76	EPSG:31466	3504829.5	5426442	3504617	5426201	unfed	not_crossed	forays
HF-46804	f	8/4/2009 1:10	alive	5/19/2009	77	EPSG:31466	3504779	5426426.5	3504617	5426201	unfed	not_crossed	natal
HF-46804	f	8/6/2009 0:50	alive	5/19/2009	79	EPSG:31466	3504729.5	5426156	3504617	5426201	unfed	not_crossed	natal
HF-46804	f	8/8/2009 0:55	alive	5/19/2009	81	EPSG:31466	3504553.5	5426230	3504617	5426201	unfed	not_crossed	natal
HF-46804	f	8/9/2009 22:40	alive	5/19/2009	82	EPSG:31466	3504818.25	5426304	3504617	5426201	unfed	not_crossed	natal
HF-46804	f	8/11/2009 22:15	alive	5/19/2009	84	EPSG:31466	3504818.25	5426304	3504617	5426201	unfed	not_crossed	natal
HF-46804	f	8/13/2009 21:20	alive	5/19/2009	86	EPSG:31466	3504833.75	5426371	3504617	5426201	unfed	not_crossed	natal
HF-46804	f	8/14/2009 12:30	alive	5/19/2009	87	EPSG:31466	3504600.5	5426215.5	3504617	5426201	unfed	not_crossed	natal
HF-46804	f	8/16/2009 0:40	alive	5/19/2009	89	EPSG:31466	3504815	5426273	3504617	5426201	unfed	not_crossed	natal
HF-46804	f	8/18/2009 3:10	alive	5/19/2009	91	EPSG:31466	3504828.5	5426379.5	3504617	5426201	unfed	not_crossed	natal
HF-46804	f	8/21/2009 0:40	alive	5/19/2009	94	EPSG:31466	3504771.75	5426418.5	3504617	5426201	unfed	not_crossed	natal
HF-46804	f	8/24/2009 5:00	alive	5/19/2009	97	EPSG:31466	3504768.75	5426439	3504617	5426201	unfed	not_crossed	natal
HF-46804	f	8/26/2009 5:25	alive	5/19/2009	99	EPSG:31466	3504853.25	5426362	3504617	5426201	unfed	not_crossed	natal
HF-46804	f	8/27/2009 21:30	alive	5/19/2009	100	EPSG:31466	3504977.5	5426433	3504617	5426201	unfed	not_crossed	forays
HF-46804	f	9/3/2009 7:19	alive	5/19/2009	107	EPSG:31466	3504836.25	5426334	3504617	5426201	unfed	not_crossed	natal
HF-46804	f	9/8/2009 7:00	alive	5/19/2009	112	EPSG:31466	3504657	5426254	3504617	5426201	unfed	not_crossed	natal
HF-46804	f	9/11/2009 3:37	alive	5/19/2009	115	EPSG:31466	3504965.5	5426251	3504617	5426201	unfed	not_crossed	forays
HF-46804	f	9/12/2009 20:25	alive	5/19/2009	116	EPSG:31466	3505055.75	5426416.5	3504617	5426201	unfed	not_crossed	forays
HF-46804	f	9/14/2009 23:50	alive	5/19/2009	118	EPSG:31466	3504922.75	5426430	3504617	5426201	unfed	not_crossed	forays
HF-46804	f	9/16/2009 12:00	alive	5/19/2009	120	EPSG:31466	3504707.5	5426409.5	3504617	5426201	unfed	not_crossed	natal
HF-46804	f	9/17/2009 6:20	alive	5/19/2009	121	EPSG:31466	3504818.75	5426447.5	3504617	5426201	unfed	not_crossed	dispersal
HF-46804	f	9/18/2009 12:00	alive	5/19/2009	122	EPSG:31466	3504555.5	5423078.5	3504617	5426201	unfed	not_crossed	dispersal
HF-46804	f	9/19/2009 16:00	alive	5/19/2009	123	EPSG:31466	3498145	5421569.5	3504617	5426201	unfed	not_crossed	dispersal
HF-46804	f	9/21/2009 12:00	alive	5/19/2009	125	EPSG:31466	3498143.25	5421559.5	3504617	5426201	unfed	not_crossed	dispersal
HF-46804	f	9/22/2009 12:00	alive	5/19/2009	126	EPSG:31466	3498156	5421565.5	3504617	5426201	unfed	not_crossed	dispersal
HF-46804	f	9/23/2009 12:00	alive	5/19/2009	127	EPSG:31466	3498160	5421555.5	3504617	5426201	unfed	not_crossed	dispersal
HF-46804	f	9/26/2009 6:00	alive	5/19/2009	130	EPSG:31466	3493114.75	5424925.5	3504617	5426201	unfed	not_crossed	dispersal
HF-46804	f	9/27/2009 12:00	alive	5/19/2009	131	EPSG:31466	3495807	5424302	3504617	5426201	unfed	not_crossed	dispersal
HF-46804	f	9/28/2009 6:05	alive	5/19/2009	132	EPSG:31466	3498290	5421553.5	3504617	5426201	unfed	not_crossed	dispersal
HF-46804	f	9/29/2009 12:00	alive	5/19/2009	133	EPSG:31466	3498256.75	5421557.5	3504617	5426201	unfed	not_crossed	dispersal
HF-46804	f	9/30/2009 12:00	alive	5/19/2009	134	EPSG:31466	3498262.5	5421549.5	3504617	5426201	unfed	not_crossed	dispersal
HF-46804	f	10/2/2009 12:00	alive	5/19/2009	136	EPSG:31466	3497649.25	5421451	3504617	5426201	unfed	not_crossed	dispersal
HF-46804	f	10/7/2009 12:00	alive	5/19/2009	141	EPSG:31466	3497835	5421470	3504617	5426201	unfed	not_crossed	dispersal
HF-46804	f	10/9/2009 20:50	alive	5/19/2009	143	EPSG:31466	3498575	5422095.5	3504617	5426201	unfed	not_crossed	dispersal
HF-46804	f	10/14/2009 21:30	alive	5/19/2009	148	EPSG:31466	3498425.5	5422203.5	3504617	5426201	unfed	not_crossed	dispersal
HF-46804	f	10/15/2009 12:00	alive	5/19/2009	149	EPSG:31466	3497535.75	5421561.5	3504617	5426201	unfed	not_crossed	dispersal
HF-46804	f	10/17/2009 20:07	alive	5/19/2009	151	EPSG:31466	3498440	5422207.5	3504617	5426201	unfed	not_crossed	dispersal
HF-46804	f	10/19/2009 12:00	alive	5/19/2009	153	EPSG:31466	3497855.75	5421457.5	3504617	5426201	unfed	not_crossed	dispersal
HF-46804	f	10/20/2009 19:40	alive	5/19/2009	154	EPSG:31466	3498575.5	5422227.5	3504617	5426201	unfed	not_crossed	dispersal
HF-46804	f	10/26/2009 21:29	alive	5/19/2009	160	EPSG:31466	3498647	5422374	3504617	5426201	unfed	not_crossed	dispersal
HF-46804	f	10/29/2009 21:25	alive	5/19/2009	163	EPSG:31466	3498372.25	5422187	3504617	5426201	unfed	not_crossed	dispersal
HF-46804	f	10/31/2009 18:09	alive	5/19/2009	165	EPSG:31466	3498537	5422341	3504617	5426201	unfed	not_crossed	dispersal
HF-46804	f	11/2/2009 12:00	alive	5/19/2009	167	EPSG:31466	3497414.5	5421729	3504617	5426201	unfed	not_crossed	dispersal
HF-46804	f	11/4/2009 18:55	alive	5/19/2009	169	EPSG:31466	3498577.5	5422205.5	3504617	5426201	unfed	not_crossed	dispersal
HF-46804	f	11/9/2009 19:14	alive	5/19/2009	174	EPSG:31466	3498564.5	5422191	3504617	5426201	unfed	not_crossed	dispersal
HF-46804	f	11/11/2009 18:10	alive	5/19/2009	176	EPSG:31466	3498469.25	5422262.5	3504617	5426201	unfed	not_crossed	dispersal
HF-46804	f	11/13/2009 12:00	alive	5/19/2009	178	EPSG:31466	3497539.75	5421551	3504617	5426201	unfed	not_crossed	dispersal
HF-46804	f	11/16/2009 18:40	alive	5/19/2009	181	EPSG:31466	3498584.75	5422227.5	3504617	5426201	unfed	not_crossed	dispersal
HF-46804	f	11/18/2009 20:30	alive	5/19/2009	183	EPSG:31466	3498487.75	5422401.5	3504617	5426201	unfed	not_crossed	dispersal
HF-46804	f	11/20/2009 22:05	alive	5/19/2009	185	EPSG:31466	3498456.5	5422231	3504617	5426201	unfed	not_crossed	dispersal
HF-46804	f	11/21/2009 12:00	alive	5/19/2009	186	EPSG:31466	3497421.25	5421717.5	3504617	5426201	unfed	not_crossed	dispersal
HF-46804	f	11/23/2009 19:50	alive	5/19/2009	188	EPSG:31466	3498680	5422409	3504617	5426201	unfed	not_crossed	dispersal
HF-46804	f	11/25/2009 18:50	alive	5/19/2009	190	EPSG:31466	3498626.75	5422284.5	3504617	5426201	unfed	not_crossed	dispersal
HF-46804	f	11/26/2009 12:00	alive	5/19/2009	191	EPSG:31466	3497548.5	5421556.5	3504617	5426201	unfed	not_crossed	dispersal
HF-46804	f	12/2/2009 4:15	alive	5/19/2009	197	EPSG:31466	3497978.5	5421876	3504617	5426201	unfed	not_crossed	dispersal
HF-46804	f	12/4/2009 12:00	alive	5/19/2009	199	EPSG:31466	3497551	5421546.5	3504617	5426201	unfed	not_crossed	dispersal
HF-46804	f	12/5/2009 5:45	alive	5/19/2009	200	EPSG:31466	3498100.5	5421818	3504617	5426201	unfed	not_crossed	dispersal
HF-46804	f	12/8/2009 20:20	alive	5/19/2009	203	EPSG:31466	3498158	5421810	3504617	5426201	unfed	not_crossed	dispersal
HF-46804	f	12/10/2009 18:15	alive	5/19/2009	205	EPSG:31466	3498524.25	5422487.5	3504617	5426201	unfed	not_crossed	dispersal
HF-46804	f	12/12/2009 12:00	alive	5/19/2009	207	EPSG:31466	3497429.75	5421705	3504617	5426201	unfed	not_crossed	dispersal
HF-46804	f	12/19/2009 19:20	alive	5/19/2009	214	EPSG:31466	3497969.5	5421815.5	3504617	5426201	unfed	not_crossed	dispersal
HF-46804	f	1/5/2010 0:25	alive	5/19/2009	231	EPSG:31466	3497883.25	5421885	3504617	5426201	unfed	not_crossed	dispersal
HF-46804	f	1/22/2010 14:30	alive	5/19/2009	248	EPSG:31466	3498090.25	5421209.5	3504617	5426201	unfed	not_crossed	dispersal
HF-46804	f	2/7/2010 23:45	alive	5/19/2009	264	EPSG:31466	3498205.75	5421209.5	3504617	5426201	unfed	not_crossed	dispersal
HF-46804	f	2/9/2010 12:00	alive	5/19/2009	266	EPSG:31466	3498173	5421170.5	3504617	5426201	unfed	not_crossed	dispersal
HF-46804	f	3/3/2010 0:00	dead	5/19/2009	288	EPSG:31466	3498186	5421214	3504617	5426201	unfed	not_crossed	dispersal
HF-46806	f	6/21/2009 12:00	alive	5/20/2009	32	EPSG:31466	3504616.75	5426201	3504617	5426201	unfed	not_crossed	natal
HF-46806	f	6/26/2009 12:00	alive	5/20/2009	37	EPSG:31466	3504593	5426212	3504617	5426201	unfed	not_crossed	natal
HF-46806	f	7/3/2009 0:15	alive	5/20/2009	44	EPSG:31466	3504599.5	5426206.5	3504617	5426201	unfed	not_crossed	natal
HF-46806	f	7/8/2009 23:45	alive	5/20/2009	49	EPSG:31466	3504599.5	5426206.5	3504617	5426201	unfed	not_crossed	natal
HF-46806	f	7/11/2009 0:10	alive	5/20/2009	52	EPSG:31466	3504550	5426213.5	3504617	5426201	unfed	not_crossed	natal
HF-46806	f	7/13/2009 23:25	alive	5/20/2009	54	EPSG:31466	3504598	5426205	3504617	5426201	unfed	not_crossed	natal
HF-46806	f	7/21/2009 21:30	alive	5/20/2009	62	EPSG:31466	3504570.75	5426232.5	3504617	5426201	unfed	not_crossed	natal
HF-46806	f	7/25/2009 1:00	alive	5/20/2009	66	EPSG:31466	3504561	5426237	3504617	5426201	unfed	not_crossed	natal
HF-46806	f	7/28/2009 2:00	alive	5/20/2009	69	EPSG:31466	3504532.25	5426223	3504617	5426201	unfed	not_crossed	natal
HF-46806	f	7/30/2009 4:20	alive	5/20/2009	71	EPSG:31466	3504547.25	5426206.5	3504617	5426201	unfed	not_crossed	natal
HF-46806	f	8/3/2009 15:00	alive	5/20/2009	75	EPSG:31466	3504831.75	5426449.5	3504617	5426201	unfed	not_crossed	forays
HF-46806	f	8/4/2009 1:20	alive	5/20/2009	76	EPSG:31466	3504820.5	5426443	3504617	5426201	unfed	not_crossed	forays
HF-46806	f	8/6/2009 0:40	alive	5/20/2009	78	EPSG:31466	3504790.25	5426116	3504617	5426201	unfed	not_crossed	natal
HF-46806	f	8/8/2009 1:05	alive	5/20/2009	80	EPSG:31466	3504714.75	5426525	3504617	5426201	unfed	not_crossed	forays
HF-46806	f	8/9/2009 22:50	alive	5/20/2009	81	EPSG:31466	3504823.25	5426264.5	3504617	5426201	unfed	not_crossed	natal
HF-46806	f	8/11/2009 22:20	alive	5/20/2009	83	EPSG:31466	3504823.25	5426290.5	3504617	5426201	unfed	not_crossed	natal
HF-46806	f	8/13/2009 21:30	alive	5/20/2009	85	EPSG:31466	3504907	5426404.5	3504617	5426201	unfed	not_crossed	forays
HF-46806	f	8/14/2009 12:30	alive	5/20/2009	86	EPSG:31466	3504601	5426212.5	3504617	5426201	unfed	not_crossed	natal
HF-46806	f	8/16/2009 1:05	alive	5/20/2009	88	EPSG:31466	3504815	5426411	3504617	5426201	unfed	not_crossed	natal
HF-46806	f	8/18/2009 3:20	alive	5/20/2009	90	EPSG:31466	3504823.25	5426425	3504617	5426201	unfed	not_crossed	forays
HF-46806	f	8/21/2009 0:50	alive	5/20/2009	93	EPSG:31466	3504826	5426422	3504617	5426201	unfed	not_crossed	forays
HF-46806	f	8/24/2009 5:05	alive	5/20/2009	96	EPSG:31466	3504830.25	5426301.5	3504617	5426201	unfed	not_crossed	natal
HF-46806	f	8/26/2009 5:35	alive	5/20/2009	98	EPSG:31466	3504835.75	5426463.5	3504617	5426201	unfed	not_crossed	forays
HF-46806	f	8/27/2009 21:35	alive	5/20/2009	99	EPSG:31466	3504776.75	5426418	3504617	5426201	unfed	not_crossed	natal
HF-46806	f	9/3/2009 7:10	alive	5/20/2009	106	EPSG:31466	3504819.25	5426441.5	3504617	5426201	unfed	not_crossed	forays
HF-46806	f	9/8/2009 7:00	alive	5/20/2009	111	EPSG:31466	3504643.5	5426272.5	3504617	5426201	unfed	not_crossed	natal
HF-46806	f	9/11/2009 3:47	alive	5/20/2009	114	EPSG:31466	3504904.25	5426348	3504617	5426201	unfed	not_crossed	dispersal
HF-46806	f	9/12/2009 20:55	alive	5/20/2009	115	EPSG:31466	3504831.5	5426421	3504617	5426201	unfed	not_crossed	dispersal
HF-46806	f	9/14/2009 23:30	alive	5/20/2009	117	EPSG:31466	3504831.5	5426422	3504617	5426201	unfed	not_crossed	dispersal
HF-46806	f	9/16/2009 12:00	alive	5/20/2009	119	EPSG:31466	3504109	5425557.5	3504617	5426201	unfed	not_crossed	dispersal
HF-46806	f	9/18/2009 12:00	alive	5/20/2009	121	EPSG:31466	3504113	5425541.5	3504617	5426201	unfed	not_crossed	dispersal
HF-46806	f	9/21/2009 20:20	alive	5/20/2009	124	EPSG:31466	3500838.5	5422198	3504617	5426201	unfed	not_crossed	dispersal
HF-46806	f	9/22/2009 12:00	alive	5/20/2009	125	EPSG:31466	3501039.5	5422521.5	3504617	5426201	unfed	not_crossed	dispersal
HF-46806	f	9/23/2009 0:35	alive	5/20/2009	126	EPSG:31466	3498428	5421602.5	3504617	5426201	unfed	not_crossed	dispersal
HF-46806	f	9/24/2009 12:00	alive	5/20/2009	127	EPSG:31466	3501054.75	5422506	3504617	5426201	unfed	not_crossed	dispersal
HF-46806	f	9/25/2009 4:20	alive	5/20/2009	128	EPSG:31466	3501136.25	5422493	3504617	5426201	unfed	not_crossed	dispersal
HF-46806	f	9/26/2009 4:05	alive	5/20/2009	129	EPSG:31466	3500952	5422598.5	3504617	5426201	unfed	not_crossed	dispersal
HF-46806	f	9/28/2009 12:00	alive	5/20/2009	131	EPSG:31466	3501037.5	5422534	3504617	5426201	unfed	not_crossed	dispersal
HF-46806	f	9/29/2009 4:11	alive	5/20/2009	132	EPSG:31466	3500950.25	5422600	3504617	5426201	unfed	not_crossed	dispersal
HF-46806	f	10/2/2009 12:00	alive	5/20/2009	135	EPSG:31466	3499689.25	5424762.5	3504617	5426201	unfed	not_crossed	dispersal
HF-46806	f	10/3/2009 12:00	alive	5/20/2009	136	EPSG:31466	3498127.5	5428067	3504617	5426201	unfed	not_crossed	dispersal
HF-46806	f	10/9/2009 20:25	alive	5/20/2009	142	EPSG:31466	3500696.75	5422462.5	3504617	5426201	unfed	not_crossed	dispersal
HF-46806	f	10/11/2009 12:00	alive	5/20/2009	144	EPSG:31466	3499749	5424655	3504617	5426201	unfed	not_crossed	dispersal
HF-46806	f	10/12/2009 1:55	alive	5/20/2009	145	EPSG:31466	3499876.25	5424809.5	3504617	5426201	unfed	not_crossed	dispersal
HF-46806	f	10/14/2009 21:50	alive	5/20/2009	147	EPSG:31466	3500542.5	5422433.5	3504617	5426201	unfed	not_crossed	dispersal
HF-46806	f	10/17/2009 19:39	alive	5/20/2009	150	EPSG:31466	3500727.5	5422475.5	3504617	5426201	unfed	not_crossed	dispersal
HF-46806	f	10/20/2009 19:55	alive	5/20/2009	153	EPSG:31466	3500598.25	5422463.5	3504617	5426201	unfed	not_crossed	dispersal
HF-46806	f	10/25/2009 22:30	alive	5/20/2009	158	EPSG:31466	3500832.75	5422394	3504617	5426201	unfed	not_crossed	dispersal
HF-46806	f	10/29/2009 21:45	alive	5/20/2009	162	EPSG:31466	3500935.75	5422622	3504617	5426201	unfed	not_crossed	dispersal
HF-46806	f	10/31/2009 17:50	alive	5/20/2009	164	EPSG:31466	3501209.75	5422063	3504617	5426201	unfed	not_crossed	dispersal
HF-46806	f	11/1/2009 12:00	alive	5/20/2009	165	EPSG:31466	3501678	5421095	3504617	5426201	unfed	not_crossed	dispersal
HF-46806	f	11/4/2009 12:00	alive	5/20/2009	168	EPSG:31466	3501680.5	5421091.5	3504617	5426201	unfed	not_crossed	dispersal
HF-46806	f	11/9/2009 18:40	alive	5/20/2009	173	EPSG:31466	3500502	5422996.5	3504617	5426201	unfed	not_crossed	dispersal
HF-46806	f	11/11/2009 19:45	alive	5/20/2009	175	EPSG:31466	3500941	5421922.5	3504617	5426201	unfed	not_crossed	dispersal
HF-46806	f	11/13/2009 12:00	alive	5/20/2009	177	EPSG:31466	3501684	5421095	3504617	5426201	unfed	not_crossed	dispersal
HF-46806	f	11/18/2009 20:00	alive	5/20/2009	182	EPSG:31466	3500764.5	5422423	3504617	5426201	unfed	not_crossed	dispersal
HF-46806	f	11/20/2009 22:05	alive	5/20/2009	184	EPSG:31466	3500976.5	5422572	3504617	5426201	unfed	not_crossed	dispersal
HF-46806	f	11/21/2009 12:00	alive	5/20/2009	185	EPSG:31466	3501522.5	5422356	3504617	5426201	unfed	not_crossed	dispersal
HF-46806	f	11/23/2009 21:50	alive	5/20/2009	187	EPSG:31466	3500556	5422428	3504617	5426201	unfed	not_crossed	dispersal
HF-46806	f	12/2/2009 3:45	alive	5/20/2009	196	EPSG:31466	3500790.25	5422593	3504617	5426201	unfed	not_crossed	dispersal
HF-46806	f	12/5/2009 5:19	alive	5/20/2009	199	EPSG:31466	3501007.25	5422535.5	3504617	5426201	unfed	not_crossed	dispersal
HF-46806	f	12/8/2009 20:40	alive	5/20/2009	202	EPSG:31466	3501047.75	5422524	3504617	5426201	unfed	not_crossed	dispersal
HF-46806	f	12/10/2009 17:40	alive	5/20/2009	204	EPSG:31466	3500456.25	5422489.5	3504617	5426201	unfed	not_crossed	dispersal
HF-46806	f	12/20/2009 12:00	alive	5/20/2009	214	EPSG:31466	3501506.75	5422356	3504617	5426201	unfed	not_crossed	dispersal
HF-46806	f	1/4/2010 23:50	alive	5/20/2009	229	EPSG:31466	3501201.25	5422389.5	3504617	5426201	unfed	not_crossed	dispersal
HF-46806	f	1/21/2010 19:15	alive	5/20/2009	246	EPSG:31466	3501003.5	5422589.5	3504617	5426201	unfed	not_crossed	dispersal
HF-46806	f	2/7/2010 23:15	alive	5/20/2009	263	EPSG:31466	3498568	5421364	3504617	5426201	unfed	not_crossed	dispersal
HF-46806	f	2/9/2010 12:00	alive	5/20/2009	265	EPSG:31466	3498654	5421455.5	3504617	5426201	unfed	not_crossed	dispersal
HF-46806	f	3/3/2010 12:00	alive	5/20/2009	287	EPSG:31466	3498671.5	5421476	3504617	5426201	unfed	not_crossed	dispersal
HF-46806	f	3/4/2010 19:45	alive	5/20/2009	288	EPSG:31466	3498433	5421368	3504617	5426201	unfed	not_crossed	dispersal
HF-46806	f	3/18/2010 3:30	alive	5/20/2009	302	EPSG:31466	3498575.25	5421501	3504617	5426201	unfed	not_crossed	dispersal
HF-46806	f	3/31/2010 17:00	alive	5/20/2009	315	EPSG:31466	3498615.5	5421487.5	3504617	5426201	unfed	not_crossed	dispersal
HF-64502	f	6/5/2010 14:20	alive	5/10/2010	26	EPSG:31466	3503494.5	5413665	3503494	5413665	fed	crossed	natal
HF-64502	f	6/20/2010 18:00	dead	5/10/2010	42	EPSG:31466	3504147.5	5413749.5	3503494	5413665	fed	crossed	dispersal
HF-64503	m	6/5/2010 14:20	alive	5/11/2010	25	EPSG:31466	3503494.5	5413665	3503494	5413665	fed	crossed	natal
HF-64503	m	7/3/2010 21:40	alive	5/11/2010	53	EPSG:31466	3503545.75	5413566	3503494	5413665	fed	crossed	natal
HF-64503	m	7/9/2010 11:36	alive	5/11/2010	59	EPSG:31466	3503539.5	5413569.5	3503494	5413665	fed	crossed	natal
HF-64503	m	7/12/2010 16:28	alive	5/11/2010	62	EPSG:31466	3503550	5413578.5	3503494	5413665	fed	crossed	natal
HF-64503	m	7/13/2010 0:03	alive	5/11/2010	63	EPSG:31466	3503486.25	5413659	3503494	5413665	fed	crossed	natal
HF-64503	m	7/17/2010 1:08	alive	5/11/2010	67	EPSG:31466	3503460.5	5413577.5	3503494	5413665	fed	crossed	natal
HF-64503	m	7/19/2010 15:50	alive	5/11/2010	69	EPSG:31466	3503573.75	5413542	3503494	5413665	fed	crossed	natal
HF-64503	m	7/20/2010 0:21	alive	5/11/2010	70	EPSG:31466	3503464	5413663	3503494	5413665	fed	crossed	natal
HF-64503	m	7/22/2010 23:42	alive	5/11/2010	72	EPSG:31466	3503550.5	5413554	3503494	5413665	fed	crossed	natal
HF-64503	m	7/26/2010 15:35	alive	5/11/2010	76	EPSG:31466	3503564.5	5413563	3503494	5413665	fed	crossed	natal
HF-64503	m	7/27/2010 1:11	alive	5/11/2010	77	EPSG:31466	3503486.25	5413582	3503494	5413665	fed	crossed	natal
HF-64503	m	7/30/2010 22:58	alive	5/11/2010	80	EPSG:31466	3503507.25	5413546.5	3503494	5413665	fed	crossed	natal
HF-64503	m	8/2/2010 17:22	alive	5/11/2010	83	EPSG:31466	3503548.25	5413567	3503494	5413665	fed	crossed	natal
HF-64503	m	8/3/2010 1:47	alive	5/11/2010	84	EPSG:31466	3503505.75	5413583.5	3503494	5413665	fed	crossed	natal
HF-64503	m	8/8/2010 23:10	alive	5/11/2010	89	EPSG:31466	3503092.5	5413341.5	3503494	5413665	fed	crossed	forays
HF-64503	m	8/12/2010 23:50	alive	5/11/2010	93	EPSG:31466	3503226.5	5413293.5	3503494	5413665	fed	crossed	forays
HF-64503	m	8/16/2010 23:36	alive	5/11/2010	97	EPSG:31466	3503190.5	5413189.5	3503494	5413665	fed	crossed	forays
HF-64503	m	8/18/2010 16:43	alive	5/11/2010	99	EPSG:31466	3503549.75	5413561.5	3503494	5413665	fed	crossed	natal
HF-64503	m	8/21/2010 1:15	alive	5/11/2010	102	EPSG:31466	3502686.5	5413407.5	3503494	5413665	fed	crossed	dispersal
HF-64503	m	8/26/2010 2:45	alive	5/11/2010	107	EPSG:31466	3503748.25	5416026.5	3503494	5413665	fed	crossed	dispersal
HF-64503	m	8/27/2010 16:23	alive	5/11/2010	108	EPSG:31466	3503677.5	5416205	3503494	5413665	fed	crossed	dispersal
HF-64503	m	8/30/2010 0:21	alive	5/11/2010	111	EPSG:31466	3503771.25	5416074	3503494	5413665	fed	crossed	dispersal
HF-64503	m	9/1/2010 17:48	alive	5/11/2010	113	EPSG:31466	3503682.75	5416179.5	3503494	5413665	fed	crossed	dispersal
HF-64503	m	9/2/2010 2:58	alive	5/11/2010	114	EPSG:31466	3503083.75	5415883.5	3503494	5413665	fed	crossed	dispersal
HF-64503	m	9/4/2010 2:43	alive	5/11/2010	116	EPSG:31466	3503545.5	5415663.5	3503494	5413665	fed	crossed	dispersal
HF-64503	m	9/5/2010 23:36	alive	5/11/2010	117	EPSG:31466	3503604	5415612.5	3503494	5413665	fed	crossed	dispersal
HF-64503	m	9/8/2010 11:56	alive	5/11/2010	120	EPSG:31466	3503727	5415645.5	3503494	5413665	fed	crossed	dispersal
HF-64503	m	9/9/2010 4:45	alive	5/11/2010	121	EPSG:31466	3503094.5	5415893.5	3503494	5413665	fed	crossed	dispersal
HF-64503	m	9/11/2010 2:58	alive	5/11/2010	123	EPSG:31466	3503663.75	5415634	3503494	5413665	fed	crossed	dispersal
HF-64503	m	9/13/2010 3:36	alive	5/11/2010	125	EPSG:31466	3503154.5	5415797	3503494	5413665	fed	crossed	dispersal
HF-64503	m	9/15/2010 0:53	alive	5/11/2010	127	EPSG:31466	3503609.75	5415622.5	3503494	5413665	fed	crossed	dispersal
HF-64503	m	9/16/2010 23:02	alive	5/11/2010	128	EPSG:31466	3503549.75	5415687.5	3503494	5413665	fed	crossed	dispersal
HF-64503	m	9/17/2010 12:13	alive	5/11/2010	129	EPSG:31466	3503606.5	5415608.5	3503494	5413665	fed	crossed	dispersal
HF-64503	m	9/19/2010 3:01	alive	5/11/2010	131	EPSG:31466	3503374.25	5415814.5	3503494	5413665	fed	crossed	dispersal
HF-64503	m	9/21/2010 2:25	alive	5/11/2010	133	EPSG:31466	3503674	5415394.5	3503494	5413665	fed	crossed	dispersal
HF-64503	m	9/23/2010 0:24	alive	5/11/2010	135	EPSG:31466	3503436.5	5415802.5	3503494	5413665	fed	crossed	dispersal
HF-64503	m	9/25/2010 3:41	alive	5/11/2010	137	EPSG:31466	3503654	5415629.5	3503494	5413665	fed	crossed	dispersal
HF-64503	m	9/26/2010 22:22	alive	5/11/2010	138	EPSG:31466	3503602.25	5415613	3503494	5413665	fed	crossed	dispersal
HF-64503	m	9/29/2010 1:48	alive	5/11/2010	141	EPSG:31466	3503591	5415669.5	3503494	5413665	fed	crossed	dispersal
HF-64503	m	10/1/2010 3:38	alive	5/11/2010	143	EPSG:31466	3503569	5415680	3503494	5413665	fed	crossed	dispersal
HF-64503	m	10/3/2010 0:09	alive	5/11/2010	145	EPSG:31466	3503515.75	5415717	3503494	5413665	fed	crossed	dispersal
HF-64503	m	10/5/2010 1:38	alive	5/11/2010	147	EPSG:31466	3502884	5415705.5	3503494	5413665	fed	crossed	dispersal
HF-64503	m	10/8/2010 2:08	alive	5/11/2010	150	EPSG:31466	3503412	5415437.5	3503494	5413665	fed	crossed	dispersal
HF-64503	m	10/10/2010 21:31	alive	5/11/2010	152	EPSG:31466	3503729	5415360.5	3503494	5413665	fed	crossed	dispersal
HF-64503	m	10/13/2010 12:55	alive	5/11/2010	155	EPSG:31466	3503607	5415610.5	3503494	5413665	fed	crossed	dispersal
HF-64503	m	10/19/2010 0:49	alive	5/11/2010	161	EPSG:31466	3503497.25	5415532	3503494	5413665	fed	crossed	dispersal
HF-64503	m	10/23/2010 1:05	alive	5/11/2010	165	EPSG:31466	3503606	5415626	3503494	5413665	fed	crossed	dispersal
HF-64503	m	10/24/2010 12:38	alive	5/11/2010	166	EPSG:31466	3503608.25	5415608	3503494	5413665	fed	crossed	dispersal
HF-64503	m	10/26/2010 1:26	alive	5/11/2010	168	EPSG:31466	3503858.25	5414811	3503494	5413665	fed	crossed	dispersal
HF-64503	m	11/2/2010 22:38	alive	5/11/2010	175	EPSG:31466	3503533.25	5415478	3503494	5413665	fed	crossed	dispersal
HF-64503	m	11/3/2010 16:48	alive	5/11/2010	176	EPSG:31466	3503607.5	5415610	3503494	5413665	fed	crossed	dispersal
HF-64503	m	11/7/2010 23:56	alive	5/11/2010	180	EPSG:31466	3503437.5	5415785	3503494	5413665	fed	crossed	dispersal
HF-64503	m	11/8/2010 0:01	alive	5/11/2010	181	EPSG:31466	3503426.5	5415813.5	3503494	5413665	fed	crossed	dispersal
HF-64503	m	11/17/2010 16:17	alive	5/11/2010	190	EPSG:31466	3503609	5415609	3503494	5413665	fed	crossed	dispersal
HF-64503	m	11/19/2010 19:04	alive	5/11/2010	192	EPSG:31466	3503748.75	5415634	3503494	5413665	fed	crossed	dispersal
HF-64503	m	11/27/2010 13:11	alive	5/11/2010	200	EPSG:31466	3503414	5415778	3503494	5413665	fed	crossed	dispersal
HF-64503	m	11/29/2010 5:51	alive	5/11/2010	202	EPSG:31466	3503592	5415406	3503494	5413665	fed	crossed	dispersal
HF-64503	m	12/15/2010 23:36	alive	5/11/2010	218	EPSG:31466	3503708.25	5415571.5	3503494	5413665	fed	crossed	dispersal
HF-64503	m	12/19/2010 15:53	alive	5/11/2010	222	EPSG:31466	3503607.5	5415610	3503494	5413665	fed	crossed	dispersal
HF-64503	m	12/27/2010 23:54	alive	5/11/2010	230	EPSG:31466	3503654.25	5415625.5	3503494	5413665	fed	crossed	dispersal
HF-64503	m	1/12/2011 2:34	alive	5/11/2010	246	EPSG:31466	3503414.75	5415801.5	3503494	5413665	fed	crossed	dispersal
HF-64503	m	1/20/2011 21:24	alive	5/11/2010	254	EPSG:31466	3503501	5415687.5	3503494	5413665	fed	crossed	dispersal
HF-64503	m	1/28/2011 13:28	alive	5/11/2010	262	EPSG:31466	3503407.25	5415777	3503494	5413665	fed	crossed	dispersal
HF-64503	m	2/4/2011 23:00	alive	5/11/2010	269	EPSG:31466	3503358.25	5415765	3503494	5413665	fed	crossed	dispersal
HF-64503	m	2/6/2011 4:09	alive	5/11/2010	271	EPSG:31466	3503551.75	5415513	3503494	5413665	fed	crossed	dispersal
HF-64503	m	2/7/2011 12:49	alive	5/11/2010	272	EPSG:31466	3503411.5	5415777.5	3503494	5413665	fed	crossed	dispersal
HF-64503	m	2/12/2011 11:17	alive	5/11/2010	277	EPSG:31466	3503414.75	5415777.5	3503494	5413665	fed	crossed	dispersal
HF-64503	m	2/13/2011 22:45	alive	5/11/2010	278	EPSG:31466	3503409.75	5415814.5	3503494	5413665	fed	crossed	dispersal
HF-64503	m	2/16/2011 13:38	alive	5/11/2010	281	EPSG:31466	3503414.5	5415779.5	3503494	5413665	fed	crossed	dispersal
HF-64503	m	2/18/2011 22:57	alive	5/11/2010	283	EPSG:31466	3503369.25	5415753.5	3503494	5413665	fed	crossed	dispersal
HF-64503	m	2/21/2011 9:53	alive	5/11/2010	286	EPSG:31466	3503413.75	5415775.5	3503494	5413665	fed	crossed	dispersal
HF-64503	m	2/23/2011 9:14	alive	5/11/2010	288	EPSG:31466	3503414.5	5415773	3503494	5413665	fed	crossed	dispersal
HF-64503	m	2/27/2011 23:46	alive	5/11/2010	292	EPSG:31466	3503255.25	5415770.5	3503494	5413665	fed	crossed	dispersal
HF-64503	m	3/2/2011 11:18	alive	5/11/2010	295	EPSG:31466	3503411.25	5415778	3503494	5413665	fed	crossed	dispersal
HF-64503	m	3/6/2011 22:02	alive	5/11/2010	299	EPSG:31466	3503408	5415785.5	3503494	5413665	fed	crossed	dispersal
HF-64503	m	3/10/2011 16:30	alive	5/11/2010	303	EPSG:31466	3503409	5415781	3503494	5413665	fed	crossed	dispersal
HF-64503	m	3/15/2011 20:59	alive	5/11/2010	308	EPSG:31466	3503549	5415779.5	3503494	5413665	fed	crossed	dispersal
HF-64503	m	3/19/2011 9:07	alive	5/11/2010	312	EPSG:31466	3503408.5	5415773	3503494	5413665	fed	crossed	dispersal
HF-64503	m	3/22/2011 23:52	alive	5/11/2010	315	EPSG:31466	3503999	5415748	3503494	5413665	fed	crossed	dispersal
HF-64503	m	3/25/2011 10:18	alive	5/11/2010	318	EPSG:31466	3503412	5415777.5	3503494	5413665	fed	crossed	dispersal
HF-64503	m	3/28/2011 23:19	alive	5/11/2010	321	EPSG:31466	3503431.5	5415731.5	3503494	5413665	fed	crossed	dispersal
HF-64503	m	3/29/2011 16:14	alive	5/11/2010	322	EPSG:31466	3503413.25	5415778	3503494	5413665	fed	crossed	dispersal
HF-64504	f	6/5/2010 14:25	alive	5/8/2010	28	EPSG:31466	3503494.5	5413665	3503494	5413665	fed	not_crossed	natal
HF-64504	f	6/29/2010 10:50	dead	5/8/2010	53	EPSG:31466	3503953.75	5413306.5	3503494	5413665	fed	not_crossed	dispersal
HF-64505	f	6/5/2010 17:40	alive	5/6/2010	30	EPSG:31466	3507673.75	5413368	3507674	5413368	fed	not_crossed	natal
HF-64505	f	7/3/2010 20:59	alive	5/6/2010	58	EPSG:31466	3507622.5	5413362	3507674	5413368	fed	not_crossed	natal
HF-64505	f	7/10/2010 0:13	alive	5/6/2010	65	EPSG:31466	3507791.25	5413355.5	3507674	5413368	fed	not_crossed	natal
HF-64505	f	7/12/2010 22:56	alive	5/6/2010	67	EPSG:31466	3507709.75	5413324.5	3507674	5413368	fed	not_crossed	natal
HF-64505	f	7/13/2010 13:50	alive	5/6/2010	68	EPSG:31466	3507665	5413338.5	3507674	5413368	fed	not_crossed	natal
HF-64505	f	7/16/2010 23:58	alive	5/6/2010	71	EPSG:31466	3507693.25	5413336	3507674	5413368	fed	not_crossed	natal
HF-64505	f	7/17/2010 0:03	alive	5/6/2010	72	EPSG:31466	3507728	5413375.5	3507674	5413368	fed	not_crossed	natal
HF-64505	f	7/19/2010 16:25	alive	5/6/2010	74	EPSG:31466	3507660.75	5413338	3507674	5413368	fed	not_crossed	natal
HF-64505	f	7/20/2010 0:53	alive	5/6/2010	75	EPSG:31466	3507726.25	5413345	3507674	5413368	fed	not_crossed	natal
HF-64505	f	7/22/2010 22:53	alive	5/6/2010	77	EPSG:31466	3507657.75	5413336	3507674	5413368	fed	not_crossed	natal
HF-64505	f	7/26/2010 16:00	alive	5/6/2010	81	EPSG:31466	3507661.5	5413339.5	3507674	5413368	fed	not_crossed	natal
HF-64505	f	7/27/2010 2:22	alive	5/6/2010	82	EPSG:31466	3507771.75	5413364.5	3507674	5413368	fed	not_crossed	natal
HF-64505	f	7/30/2010 23:24	alive	5/6/2010	85	EPSG:31466	3507752.75	5413386	3507674	5413368	fed	not_crossed	natal
HF-64505	f	8/2/2010 17:43	alive	5/6/2010	88	EPSG:31466	3507659	5413347.5	3507674	5413368	fed	not_crossed	natal
HF-64505	f	8/3/2010 2:28	alive	5/6/2010	89	EPSG:31466	3507717.25	5413370.5	3507674	5413368	fed	not_crossed	natal
HF-64505	f	8/7/2010 0:23	alive	5/6/2010	93	EPSG:31466	3507712.75	5413400.5	3507674	5413368	fed	not_crossed	natal
HF-64505	f	8/12/2010 23:15	alive	5/6/2010	98	EPSG:31466	3507721.5	5413398.5	3507674	5413368	fed	not_crossed	natal
HF-64505	f	8/17/2010 0:16	alive	5/6/2010	103	EPSG:31466	3507776.25	5413264.5	3507674	5413368	fed	not_crossed	natal
HF-64505	f	8/18/2010 18:40	alive	5/6/2010	104	EPSG:31466	3507637.5	5413354	3507674	5413368	fed	not_crossed	natal
HF-64505	f	8/21/2010 0:11	alive	5/6/2010	107	EPSG:31466	3507773.5	5413273.5	3507674	5413368	fed	not_crossed	natal
HF-64505	f	8/26/2010 4:00	alive	5/6/2010	112	EPSG:31466	3506699	5412460	3507674	5413368	fed	not_crossed	forays
HF-64505	f	8/27/2010 12:53	alive	5/6/2010	113	EPSG:31466	3507656.25	5413336	3507674	5413368	fed	not_crossed	natal
HF-64505	f	8/30/2010 4:47	alive	5/6/2010	116	EPSG:31466	3507554.5	5413406	3507674	5413368	fed	not_crossed	natal
HF-64505	f	8/31/2010 12:38	alive	5/6/2010	117	EPSG:31466	3507665	5413341.5	3507674	5413368	fed	not_crossed	natal
HF-64505	f	9/2/2010 0:13	alive	5/6/2010	119	EPSG:31466	3507343	5413652	3507674	5413368	fed	not_crossed	forays
HF-64505	f	9/4/2010 7:02	alive	5/6/2010	121	EPSG:31466	3507653	5413370	3507674	5413368	fed	not_crossed	natal
HF-64505	f	9/6/2010 3:37	alive	5/6/2010	123	EPSG:31466	3507433.25	5413713.5	3507674	5413368	fed	not_crossed	forays
HF-64505	f	9/9/2010 5:40	alive	5/6/2010	126	EPSG:31466	3507813	5413396.5	3507674	5413368	fed	not_crossed	natal
HF-64505	f	9/11/2010 22:08	alive	5/6/2010	128	EPSG:31466	3507314.25	5413566.5	3507674	5413368	fed	not_crossed	forays
HF-64505	f	9/13/2010 4:55	alive	5/6/2010	130	EPSG:31466	3507620.75	5413337	3507674	5413368	fed	not_crossed	natal
HF-64505	f	9/15/2010 1:20	alive	5/6/2010	132	EPSG:31466	3507627.25	5413580.5	3507674	5413368	fed	not_crossed	natal
HF-64505	f	9/16/2010 23:47	alive	5/6/2010	133	EPSG:31466	3507286.5	5413530.5	3507674	5413368	fed	not_crossed	forays
HF-64505	f	9/17/2010 14:19	alive	5/6/2010	134	EPSG:31466	3507647.75	5413348.5	3507674	5413368	fed	not_crossed	natal
HF-64505	f	9/18/2010 22:07	alive	5/6/2010	135	EPSG:31466	3507171	5413706	3507674	5413368	fed	not_crossed	dispersal
HF-64505	f	9/21/2010 4:22	alive	5/6/2010	138	EPSG:31466	3507324	5413563	3507674	5413368	fed	not_crossed	dispersal
HF-64505	f	9/25/2010 14:20	alive	5/6/2010	142	EPSG:31466	3519349.5	5414016.5	3507674	5413368	fed	not_crossed	dispersal
HF-64505	f	9/26/2010 18:12	alive	5/6/2010	143	EPSG:31466	3518895	5413689.5	3507674	5413368	fed	not_crossed	dispersal
HF-64505	f	9/27/2010 0:25	alive	5/6/2010	144	EPSG:31466	3519007.75	5413441	3507674	5413368	fed	not_crossed	dispersal
HF-64505	f	9/28/2010 2:06	alive	5/6/2010	145	EPSG:31466	3518946	5413601	3507674	5413368	fed	not_crossed	dispersal
HF-64505	f	9/29/2010 0:53	alive	5/6/2010	146	EPSG:31466	3518940.25	5413612	3507674	5413368	fed	not_crossed	dispersal
HF-64505	f	10/1/2010 1:44	alive	5/6/2010	148	EPSG:31466	3518919.25	5413599.5	3507674	5413368	fed	not_crossed	dispersal
HF-64505	f	10/3/2010 0:34	alive	5/6/2010	150	EPSG:31466	3519098.75	5413484.5	3507674	5413368	fed	not_crossed	dispersal
HF-64505	f	10/5/2010 23:42	alive	5/6/2010	152	EPSG:31466	3518925.25	5413589	3507674	5413368	fed	not_crossed	dispersal
HF-64505	f	10/9/2010 0:35	alive	5/6/2010	156	EPSG:31466	3518917.75	5413554.5	3507674	5413368	fed	not_crossed	dispersal
HF-64505	f	10/11/2010 22:55	alive	5/6/2010	158	EPSG:31466	3519022.5	5413650	3507674	5413368	fed	not_crossed	dispersal
HF-64505	f	10/16/2010 20:09	alive	5/6/2010	163	EPSG:31466	3518933	5413599.5	3507674	5413368	fed	not_crossed	dispersal
HF-64505	f	10/20/2010 0:23	alive	5/6/2010	167	EPSG:31466	3519110.25	5413439.5	3507674	5413368	fed	not_crossed	dispersal
HF-64505	f	10/24/2010 0:39	alive	5/6/2010	171	EPSG:31466	3519071.5	5413478	3507674	5413368	fed	not_crossed	dispersal
HF-64505	f	10/28/2010 16:00	dead	5/6/2010	176	EPSG:31466	3518850.75	5413668.5	3507674	5413368	fed	not_crossed	dispersal
HF-64507	f	6/5/2010 17:32	alive	5/7/2010	29	EPSG:31466	3507673.75	5413368	3507674	5413368	fed	not_crossed	natal
HF-64507	f	7/3/2010 21:04	alive	5/7/2010	57	EPSG:31466	3507674.5	5413337	3507674	5413368	fed	not_crossed	natal
HF-64507	f	7/10/2010 0:15	alive	5/7/2010	64	EPSG:31466	3507764.75	5413385.5	3507674	5413368	fed	not_crossed	natal
HF-64507	f	7/12/2010 22:44	alive	5/7/2010	66	EPSG:31466	3507715.75	5413383.5	3507674	5413368	fed	not_crossed	natal
HF-64507	f	7/13/2010 13:56	alive	5/7/2010	67	EPSG:31466	3507664.5	5413338.5	3507674	5413368	fed	not_crossed	natal
HF-64507	f	7/17/2010 0:05	alive	5/7/2010	71	EPSG:31466	3507721.75	5413361.5	3507674	5413368	fed	not_crossed	natal
HF-64507	f	7/19/2010 16:32	alive	5/7/2010	73	EPSG:31466	3507610	5413325.5	3507674	5413368	fed	not_crossed	natal
HF-64507	f	7/20/2010 1:05	alive	5/7/2010	74	EPSG:31466	3507693.25	5413296.5	3507674	5413368	fed	not_crossed	natal
HF-64507	f	7/22/2010 23:08	alive	5/7/2010	76	EPSG:31466	3507653.25	5413334.5	3507674	5413368	fed	not_crossed	natal
HF-64507	f	7/26/2010 16:03	alive	5/7/2010	80	EPSG:31466	3507662.5	5413340.5	3507674	5413368	fed	not_crossed	natal
HF-64507	f	7/27/2010 2:10	alive	5/7/2010	81	EPSG:31466	3507665.5	5413364.5	3507674	5413368	fed	not_crossed	natal
HF-64507	f	7/30/2010 23:43	alive	5/7/2010	84	EPSG:31466	3507676	5413584	3507674	5413368	fed	not_crossed	natal
HF-64507	f	8/2/2010 17:44	alive	5/7/2010	87	EPSG:31466	3507660.25	5413347.5	3507674	5413368	fed	not_crossed	natal
HF-64507	f	8/3/2010 2:19	alive	5/7/2010	88	EPSG:31466	3507779	5413353	3507674	5413368	fed	not_crossed	natal
HF-64507	f	8/7/2010 0:13	alive	5/7/2010	92	EPSG:31466	3507716	5413581	3507674	5413368	fed	not_crossed	natal
HF-64507	f	8/12/2010 23:12	alive	5/7/2010	97	EPSG:31466	3507732.25	5413384	3507674	5413368	fed	not_crossed	natal
HF-64507	f	8/17/2010 0:06	alive	5/7/2010	102	EPSG:31466	3507685	5413294.5	3507674	5413368	fed	not_crossed	natal
HF-64507	f	8/18/2010 18:42	alive	5/7/2010	103	EPSG:31466	3507664.25	5413346.5	3507674	5413368	fed	not_crossed	natal
HF-64507	f	8/21/2010 0:21	alive	5/7/2010	106	EPSG:31466	3507646.5	5413347.5	3507674	5413368	fed	not_crossed	natal
HF-64507	f	8/26/2010 4:00	alive	5/7/2010	111	EPSG:31466	3506764.5	5412295	3507674	5413368	fed	not_crossed	forays
HF-64507	f	8/27/2010 12:55	alive	5/7/2010	112	EPSG:31466	3507653.5	5413336.5	3507674	5413368	fed	not_crossed	natal
HF-64507	f	8/30/2010 5:03	alive	5/7/2010	115	EPSG:31466	3507639	5413479.5	3507674	5413368	fed	not_crossed	natal
HF-64507	f	8/31/2010 12:38	alive	5/7/2010	116	EPSG:31466	3507663.25	5413339.5	3507674	5413368	fed	not_crossed	natal
HF-64507	f	9/2/2010 0:58	alive	5/7/2010	118	EPSG:31466	3506973.5	5412019	3507674	5413368	fed	not_crossed	forays
HF-64507	f	9/4/2010 6:47	alive	5/7/2010	120	EPSG:31466	3507660.75	5413290	3507674	5413368	fed	not_crossed	natal
HF-64507	f	9/6/2010 2:58	alive	5/7/2010	122	EPSG:31466	3507322.25	5412046	3507674	5413368	fed	not_crossed	forays
HF-64507	f	9/9/2010 6:12	alive	5/7/2010	125	EPSG:31466	3507569.5	5413510	3507674	5413368	fed	not_crossed	natal
HF-64507	f	9/11/2010 2:20	alive	5/7/2010	127	EPSG:31466	3507437.5	5411603	3507674	5413368	fed	not_crossed	forays
HF-64507	f	9/13/2010 5:10	alive	5/7/2010	129	EPSG:31466	3508387	5412331.5	3507674	5413368	fed	not_crossed	forays
HF-64507	f	9/15/2010 1:57	alive	5/7/2010	131	EPSG:31466	3507203.25	5413576.5	3507674	5413368	fed	not_crossed	forays
HF-64507	f	9/16/2010 23:56	alive	5/7/2010	132	EPSG:31466	3507473.25	5413465.5	3507674	5413368	fed	not_crossed	natal
HF-64507	f	9/17/2010 0:01	alive	5/7/2010	133	EPSG:31466	3507481.5	5413438	3507674	5413368	fed	not_crossed	natal
HF-64507	f	9/19/2010 1:16	alive	5/7/2010	135	EPSG:31466	3504806	5408663	3507674	5413368	fed	not_crossed	forays
HF-64507	f	9/21/2010 4:53	alive	5/7/2010	137	EPSG:31466	3506947.25	5412126	3507674	5413368	fed	not_crossed	forays
HF-64507	f	9/22/2010 23:00	alive	5/7/2010	138	EPSG:31466	3507036.75	5411090	3507674	5413368	fed	not_crossed	forays
HF-64507	f	9/23/2010 21:30	alive	5/7/2010	139	EPSG:31466	3506168.75	5412094	3507674	5413368	fed	not_crossed	forays
HF-64507	f	9/24/2010 16:13	alive	5/7/2010	140	EPSG:31466	3507654.75	5413346	3507674	5413368	fed	not_crossed	natal
HF-64507	f	9/25/2010 3:09	alive	5/7/2010	141	EPSG:31466	3507066.25	5411094.5	3507674	5413368	fed	not_crossed	forays
HF-64507	f	9/26/2010 23:39	alive	5/7/2010	142	EPSG:31466	3507076	5411047.5	3507674	5413368	fed	not_crossed	forays
HF-64507	f	9/28/2010 21:49	alive	5/7/2010	144	EPSG:31466	3506902.5	5412536	3507674	5413368	fed	not_crossed	forays
HF-64507	f	9/30/2010 23:40	alive	5/7/2010	146	EPSG:31466	3507856	5413424	3507674	5413368	fed	not_crossed	natal
HF-64507	f	10/3/2010 1:35	alive	5/7/2010	149	EPSG:31466	3507695.75	5412540	3507674	5413368	fed	not_crossed	forays
HF-64507	f	10/4/2010 23:05	alive	5/7/2010	150	EPSG:31466	3507053.75	5411275.5	3507674	5413368	fed	not_crossed	forays
HF-64507	f	10/6/2010 18:11	alive	5/7/2010	152	EPSG:31466	3507659.75	5413342.5	3507674	5413368	fed	not_crossed	natal
HF-64507	f	10/8/2010 2:19	alive	5/7/2010	154	EPSG:31466	3507055.75	5411385	3507674	5413368	fed	not_crossed	dispersal
HF-64507	f	10/11/2010 1:26	alive	5/7/2010	157	EPSG:31466	3507359	5411805	3507674	5413368	fed	not_crossed	dispersal
HF-64507	f	10/13/2010 23:37	alive	5/7/2010	159	EPSG:31466	3506991	5411379.5	3507674	5413368	fed	not_crossed	dispersal
HF-64507	f	10/18/2010 23:36	alive	5/7/2010	164	EPSG:31466	3506773.5	5411659	3507674	5413368	fed	not_crossed	dispersal
HF-64507	f	10/23/2010 1:51	alive	5/7/2010	169	EPSG:31466	3506722.5	5412499.5	3507674	5413368	fed	not_crossed	dispersal
HF-64507	f	10/26/2010 3:30	alive	5/7/2010	172	EPSG:31466	3507312.5	5412207	3507674	5413368	fed	not_crossed	dispersal
HF-64507	f	10/27/2010 15:37	alive	5/7/2010	173	EPSG:31466	3507136.75	5412562.5	3507674	5413368	fed	not_crossed	dispersal
HF-64507	f	11/3/2010 2:55	alive	5/7/2010	180	EPSG:31466	3507513	5412207.5	3507674	5413368	fed	not_crossed	dispersal
HF-64507	f	11/5/2010 16:12	alive	5/7/2010	182	EPSG:31466	3507130.5	5412555	3507674	5413368	fed	not_crossed	dispersal
HF-64507	f	11/6/2010 22:49	alive	5/7/2010	183	EPSG:31466	3507211	5412210.5	3507674	5413368	fed	not_crossed	dispersal
HF-64507	f	11/17/2010 22:49	alive	5/7/2010	194	EPSG:31466	3508460.75	5412279.5	3507674	5413368	fed	not_crossed	dispersal
HF-64507	f	11/21/2010 13:34	alive	5/7/2010	198	EPSG:31466	3507185.75	5412553.5	3507674	5413368	fed	not_crossed	dispersal
HF-64507	f	11/24/2010 3:39	alive	5/7/2010	201	EPSG:31466	3507465	5412240	3507674	5413368	fed	not_crossed	dispersal
HF-64507	f	11/30/2010 15:34	alive	5/7/2010	207	EPSG:31466	3508324	5412337	3507674	5413368	fed	not_crossed	dispersal
HF-64507	f	12/14/2010 19:10	alive	5/7/2010	221	EPSG:31466	3507212.25	5412228.5	3507674	5413368	fed	not_crossed	dispersal
HF-64507	f	12/20/2010 13:04	alive	5/7/2010	227	EPSG:31466	3507181	5412553	3507674	5413368	fed	not_crossed	dispersal
HF-64507	f	12/28/2010 20:31	alive	5/7/2010	235	EPSG:31466	3507900.75	5412499.5	3507674	5413368	fed	not_crossed	dispersal
HF-64507	f	1/12/2011 20:52	alive	5/7/2010	250	EPSG:31466	3506564.5	5413353	3507674	5413368	fed	not_crossed	dispersal
HF-64507	f	1/28/2011 11:15	alive	5/7/2010	266	EPSG:31466	3506445.75	5413294	3507674	5413368	fed	not_crossed	dispersal
HF-64507	f	1/31/2011 23:46	alive	5/7/2010	269	EPSG:31466	3506385.5	5413382.5	3507674	5413368	fed	not_crossed	dispersal
HF-64507	f	2/4/2011 10:20	alive	5/7/2010	273	EPSG:31466	3506404.5	5413303.5	3507674	5413368	fed	not_crossed	dispersal
HF-64507	f	2/7/2011 9:08	alive	5/7/2010	276	EPSG:31466	3506445.5	5413301	3507674	5413368	fed	not_crossed	dispersal
HF-64507	f	2/9/2011 1:31	alive	5/7/2010	278	EPSG:31466	3506411	5413249.5	3507674	5413368	fed	not_crossed	dispersal
HF-64507	f	2/11/2011 14:08	alive	5/7/2010	280	EPSG:31466	3506438.25	5413298.5	3507674	5413368	fed	not_crossed	dispersal
HF-64507	f	2/15/2011 20:23	alive	5/7/2010	284	EPSG:31466	3506351.5	5413246.5	3507674	5413368	fed	not_crossed	dispersal
HF-64507	f	2/16/2011 11:44	alive	5/7/2010	285	EPSG:31466	3506447.25	5413296	3507674	5413368	fed	not_crossed	dispersal
HF-64507	f	2/21/2011 11:36	alive	5/7/2010	290	EPSG:31466	3506433.5	5413295	3507674	5413368	fed	not_crossed	dispersal
HF-64507	f	2/22/2011 20:46	alive	5/7/2010	291	EPSG:31466	3505981	5413930.5	3507674	5413368	fed	not_crossed	dispersal
HF-64507	f	2/23/2011 9:46	alive	5/7/2010	292	EPSG:31466	3506061.25	5413952.5	3507674	5413368	fed	not_crossed	dispersal
HF-64507	f	3/2/2011 13:22	alive	5/7/2010	299	EPSG:31466	3506442.5	5413298.5	3507674	5413368	fed	not_crossed	dispersal
HF-64507	f	3/4/2011 21:17	alive	5/7/2010	301	EPSG:31466	3506242.25	5413596	3507674	5413368	fed	not_crossed	dispersal
HF-64507	f	3/10/2011 15:20	alive	5/7/2010	307	EPSG:31466	3506429.25	5413301.5	3507674	5413368	fed	not_crossed	dispersal
HF-64507	f	3/14/2011 21:01	alive	5/7/2010	311	EPSG:31466	3505908.75	5413194.5	3507674	5413368	fed	not_crossed	dispersal
HF-64507	f	3/17/2011 16:27	alive	5/7/2010	314	EPSG:31466	3506375.5	5413275.5	3507674	5413368	fed	not_crossed	dispersal
HF-64507	f	3/22/2011 1:32	alive	5/7/2010	319	EPSG:31466	3506327.5	5413390	3507674	5413368	fed	not_crossed	dispersal
HF-64507	f	3/24/2011 22:24	alive	5/7/2010	321	EPSG:31466	3506373	5413274.5	3507674	5413368	fed	not_crossed	dispersal
HF-64507	f	3/28/2011 18:32	alive	5/7/2010	325	EPSG:31466	3506376.75	5413276	3507674	5413368	fed	not_crossed	dispersal
HF-64507	f	3/30/2011 22:02	alive	5/7/2010	327	EPSG:31466	3506380.75	5413267	3507674	5413368	fed	not_crossed	dispersal
HF-64544	m	6/10/2010 16:25	alive	5/14/2010	27	EPSG:31466	3521432.75	5431155.5	3521433	5431155	fed	not_crossed	natal
HF-64544	m	7/4/2010 21:34	alive	5/14/2010	51	EPSG:31466	3521180.25	5431167.5	3521433	5431155	fed	not_crossed	natal
HF-64544	m	7/6/2010 17:11	alive	5/14/2010	53	EPSG:31466	3521383.75	5431162.5	3521433	5431155	fed	not_crossed	natal
HF-64544	m	7/10/2010 22:31	alive	5/14/2010	57	EPSG:31466	3521425.75	5431158	3521433	5431155	fed	not_crossed	natal
HF-64544	m	7/14/2010 0:40	alive	5/14/2010	61	EPSG:31466	3521522.5	5431043.5	3521433	5431155	fed	not_crossed	natal
HF-64544	m	7/15/2010 14:42	alive	5/14/2010	62	EPSG:31466	3521393.25	5431153	3521433	5431155	fed	not_crossed	natal
HF-64544	m	7/17/2010 23:45	alive	5/14/2010	64	EPSG:31466	3521541.5	5431247	3521433	5431155	fed	not_crossed	natal
HF-64544	m	7/20/2010 17:26	alive	5/14/2010	67	EPSG:31466	3521395.5	5431154	3521433	5431155	fed	not_crossed	natal
HF-64544	m	7/21/2010 1:28	alive	5/14/2010	68	EPSG:31466	3521326	5431167.5	3521433	5431155	fed	not_crossed	natal
HF-64544	m	7/24/2010 22:44	alive	5/14/2010	71	EPSG:31466	3521521.25	5431290	3521433	5431155	fed	not_crossed	natal
HF-64544	m	7/28/2010 0:11	alive	5/14/2010	75	EPSG:31466	3521714.75	5431222	3521433	5431155	fed	not_crossed	natal
HF-64544	m	7/30/2010 17:23	alive	5/14/2010	77	EPSG:31466	3521397.25	5431163	3521433	5431155	fed	not_crossed	natal
HF-64544	m	8/1/2010 1:28	alive	5/14/2010	79	EPSG:31466	3521593.5	5431243	3521433	5431155	fed	not_crossed	natal
HF-64544	m	8/3/2010 22:35	alive	5/14/2010	81	EPSG:31466	3521599	5431243	3521433	5431155	fed	not_crossed	natal
HF-64544	m	8/10/2010 0:08	alive	5/14/2010	88	EPSG:31466	3521356.5	5431040.5	3521433	5431155	fed	not_crossed	natal
HF-64544	m	8/11/2010 12:57	alive	5/14/2010	89	EPSG:31466	3521423.25	5431157.5	3521433	5431155	fed	not_crossed	natal
HF-64544	m	8/14/2010 1:45	alive	5/14/2010	92	EPSG:31466	3521626.5	5431025.5	3521433	5431155	fed	not_crossed	natal
HF-64544	m	8/18/2010 1:36	alive	5/14/2010	96	EPSG:31466	3521761.25	5431128	3521433	5431155	fed	not_crossed	forays
HF-64544	m	8/20/2010 17:29	alive	5/14/2010	98	EPSG:31466	3521404.25	5431157	3521433	5431155	fed	not_crossed	natal
HF-64544	m	8/22/2010 23:45	alive	5/14/2010	100	EPSG:31466	3521352.5	5431361.5	3521433	5431155	fed	not_crossed	natal
HF-64544	m	8/26/2010 12:45	alive	5/14/2010	104	EPSG:31466	3521405	5431137.5	3521433	5431155	fed	not_crossed	natal
HF-64544	m	8/28/2010 23:50	alive	5/14/2010	106	EPSG:31466	3521715.5	5431419.5	3521433	5431155	fed	not_crossed	forays
HF-64544	m	8/30/2010 16:38	alive	5/14/2010	108	EPSG:31466	3521386.75	5431158	3521433	5431155	fed	not_crossed	natal
HF-64544	m	9/1/2010 2:38	alive	5/14/2010	110	EPSG:31466	3521873.25	5431275.5	3521433	5431155	fed	not_crossed	forays
HF-64544	m	9/3/2010 3:33	alive	5/14/2010	112	EPSG:31466	3521615.25	5431392.5	3521433	5431155	fed	not_crossed	natal
HF-64544	m	9/5/2010 6:42	alive	5/14/2010	114	EPSG:31466	3521306.5	5431095	3521433	5431155	fed	not_crossed	natal
HF-64544	m	9/7/2010 22:40	alive	5/14/2010	116	EPSG:31466	3521726.75	5431318	3521433	5431155	fed	not_crossed	forays
HF-64544	m	9/10/2010 5:50	alive	5/14/2010	119	EPSG:31466	3521856	5431278	3521433	5431155	fed	not_crossed	forays
HF-64544	m	9/11/2010 11:30	alive	5/14/2010	120	EPSG:31466	3521399.5	5431158.5	3521433	5431155	fed	not_crossed	natal
HF-64544	m	9/14/2010 2:27	alive	5/14/2010	123	EPSG:31466	3521413.75	5431235.5	3521433	5431155	fed	not_crossed	natal
HF-64544	m	9/16/2010 1:56	alive	5/14/2010	125	EPSG:31466	3521546.75	5431230.5	3521433	5431155	fed	not_crossed	natal
HF-64544	m	9/18/2010 1:05	alive	5/14/2010	127	EPSG:31466	3521762	5431346.5	3521433	5431155	fed	not_crossed	forays
HF-64544	m	9/19/2010 13:24	alive	5/14/2010	128	EPSG:31466	3521381.25	5431152	3521433	5431155	fed	not_crossed	natal
HF-64544	m	9/20/2010 0:16	alive	5/14/2010	129	EPSG:31466	3521442.25	5431450.5	3521433	5431155	fed	not_crossed	natal
HF-64544	m	9/22/2010 0:01	alive	5/14/2010	131	EPSG:31466	3521386.75	5431576.5	3521433	5431155	fed	not_crossed	dispersal
HF-64544	m	9/24/2010 0:01	alive	5/14/2010	133	EPSG:31466	3522884.25	5431632.5	3521433	5431155	fed	not_crossed	dispersal
HF-64544	m	9/26/2010 4:09	alive	5/14/2010	135	EPSG:31466	3522345	5431450.5	3521433	5431155	fed	not_crossed	dispersal
HF-64544	m	9/28/2010 3:59	alive	5/14/2010	137	EPSG:31466	3522726.75	5431387.5	3521433	5431155	fed	not_crossed	dispersal
HF-64544	m	9/30/2010 3:40	alive	5/14/2010	139	EPSG:31466	3522490	5432286	3521433	5431155	fed	not_crossed	dispersal
HF-64544	m	10/1/2010 16:07	alive	5/14/2010	140	EPSG:31466	3522709.25	5431437	3521433	5431155	fed	not_crossed	dispersal
HF-64544	m	10/2/2010 0:47	alive	5/14/2010	141	EPSG:31466	3522195.5	5432172.5	3521433	5431155	fed	not_crossed	dispersal
HF-64544	m	10/4/2010 6:02	alive	5/14/2010	143	EPSG:31466	3522763.75	5431367	3521433	5431155	fed	not_crossed	dispersal
HF-64544	m	10/7/2010 0:36	alive	5/14/2010	146	EPSG:31466	3522037	5430406.5	3521433	5431155	fed	not_crossed	dispersal
HF-64544	m	10/8/2010 1:57	alive	5/14/2010	147	EPSG:31466	3521933.5	5431324	3521433	5431155	fed	not_crossed	dispersal
HF-64544	m	10/9/2010 22:55	alive	5/14/2010	148	EPSG:31466	3522865.25	5432155.5	3521433	5431155	fed	not_crossed	dispersal
HF-64544	m	10/10/2010 17:42	alive	5/14/2010	149	EPSG:31466	3522682	5430780	3521433	5431155	fed	not_crossed	dispersal
HF-64544	m	10/12/2010 23:10	alive	5/14/2010	151	EPSG:31466	3522307	5432452	3521433	5431155	fed	not_crossed	dispersal
HF-64544	m	10/17/2010 23:32	alive	5/14/2010	156	EPSG:31466	3522348	5430789	3521433	5431155	fed	not_crossed	dispersal
HF-64544	m	10/21/2010 3:01	alive	5/14/2010	160	EPSG:31466	3522577.25	5430779	3521433	5431155	fed	not_crossed	dispersal
HF-64544	m	10/25/2010 3:30	alive	5/14/2010	164	EPSG:31466	3522302.5	5430687.5	3521433	5431155	fed	not_crossed	dispersal
HF-64544	m	11/2/2010 2:42	alive	5/14/2010	172	EPSG:31466	3521685.25	5432367	3521433	5431155	fed	not_crossed	dispersal
HF-64544	m	11/5/2010 14:26	alive	5/14/2010	175	EPSG:31466	3522703	5430809	3521433	5431155	fed	not_crossed	dispersal
HF-64544	m	11/16/2010 13:17	alive	5/14/2010	186	EPSG:31466	3522750.75	5430771	3521433	5431155	fed	not_crossed	dispersal
HF-64544	m	11/17/2010 1:16	alive	5/14/2010	187	EPSG:31466	3522677.75	5432282.5	3521433	5431155	fed	not_crossed	dispersal
HF-64544	m	11/23/2010 5:00	alive	5/14/2010	193	EPSG:31466	3522486	5430692	3521433	5431155	fed	not_crossed	dispersal
HF-64544	m	11/29/2010 12:29	alive	5/14/2010	199	EPSG:31466	3522739.25	5430801.5	3521433	5431155	fed	not_crossed	dispersal
HF-64544	m	12/12/2010 19:33	dead	5/14/2010	213	EPSG:31466	3522773.25	5430775.5	3521433	5431155	fed	not_crossed	dispersal
HF-64545	f	6/10/2010 16:40	alive	5/17/2010	24	EPSG:31466	3521432.75	5431155.5	3521433	5431155	fed	crossed	natal
HF-64545	f	7/4/2010 21:44	alive	5/17/2010	48	EPSG:31466	3521376.75	5431136.5	3521433	5431155	fed	crossed	natal
HF-64545	f	7/6/2010 17:06	alive	5/17/2010	50	EPSG:31466	3521429	5431153.5	3521433	5431155	fed	crossed	natal
HF-64545	f	7/10/2010 22:45	alive	5/17/2010	54	EPSG:31466	3521455	5431049.5	3521433	5431155	fed	crossed	natal
HF-64545	f	7/14/2010 0:17	alive	5/17/2010	58	EPSG:31466	3521417.25	5431154.5	3521433	5431155	fed	crossed	natal
HF-64545	f	7/15/2010 14:49	alive	5/17/2010	59	EPSG:31466	3521391.75	5431159	3521433	5431155	fed	crossed	natal
HF-64545	f	7/17/2010 23:23	alive	5/17/2010	61	EPSG:31466	3521372.25	5430940	3521433	5431155	fed	crossed	natal
HF-64545	f	7/20/2010 17:29	alive	5/17/2010	64	EPSG:31466	3521395.75	5431154	3521433	5431155	fed	crossed	natal
HF-64545	f	7/21/2010 1:50	alive	5/17/2010	65	EPSG:31466	3521548.25	5431178.5	3521433	5431155	fed	crossed	natal
HF-64545	f	7/24/2010 23:16	alive	5/17/2010	68	EPSG:31466	3521514.5	5431051.5	3521433	5431155	fed	crossed	natal
HF-64545	f	7/28/2010 0:31	alive	5/17/2010	72	EPSG:31466	3521465.25	5431421.5	3521433	5431155	fed	crossed	natal
HF-64545	f	7/30/2010 17:25	alive	5/17/2010	74	EPSG:31466	3521395.75	5431162	3521433	5431155	fed	crossed	natal
HF-64545	f	8/1/2010 0:59	alive	5/17/2010	76	EPSG:31466	3521493	5431237	3521433	5431155	fed	crossed	natal
HF-64545	f	8/3/2010 22:09	alive	5/17/2010	78	EPSG:31466	3521378.5	5431055	3521433	5431155	fed	crossed	natal
HF-64545	f	8/9/2010 23:57	alive	5/17/2010	84	EPSG:31466	3521388	5431093.5	3521433	5431155	fed	crossed	natal
HF-64545	f	8/10/2010 0:02	alive	5/17/2010	85	EPSG:31466	3521385.75	5431092.5	3521433	5431155	fed	crossed	natal
HF-64545	f	8/11/2010 13:05	alive	5/17/2010	86	EPSG:31466	3521426.5	5431158.5	3521433	5431155	fed	crossed	natal
HF-64545	f	8/14/2010 1:45	alive	5/17/2010	89	EPSG:31466	3521572.5	5431028.5	3521433	5431155	fed	crossed	natal
HF-64545	f	8/18/2010 1:23	alive	5/17/2010	93	EPSG:31466	3521549.75	5431169	3521433	5431155	fed	crossed	natal
HF-64545	f	8/20/2010 17:29	alive	5/17/2010	95	EPSG:31466	3521402.5	5431159.5	3521433	5431155	fed	crossed	natal
HF-64545	f	8/23/2010 1:40	alive	5/17/2010	98	EPSG:31466	3520605.5	5434139.5	3521433	5431155	fed	crossed	forays
HF-64545	f	8/26/2010 11:40	alive	5/17/2010	101	EPSG:31466	3521400	5431153	3521433	5431155	fed	crossed	natal
HF-64545	f	8/28/2010 23:56	alive	5/17/2010	103	EPSG:31466	3521611.75	5431393.5	3521433	5431155	fed	crossed	natal
HF-64545	f	8/29/2010 0:01	alive	5/17/2010	104	EPSG:31466	3521533.5	5431232.5	3521433	5431155	fed	crossed	natal
HF-64545	f	8/30/2010 16:36	alive	5/17/2010	105	EPSG:31466	3521384.5	5431156.5	3521433	5431155	fed	crossed	natal
HF-64545	f	9/1/2010 1:18	alive	5/17/2010	107	EPSG:31466	3521513	5431456	3521433	5431155	fed	crossed	forays
HF-64545	f	9/3/2010 3:23	alive	5/17/2010	109	EPSG:31466	3521690.75	5431266	3521433	5431155	fed	crossed	natal
HF-64545	f	9/5/2010 6:27	alive	5/17/2010	111	EPSG:31466	3521292.25	5431163.5	3521433	5431155	fed	crossed	natal
HF-64545	f	9/7/2010 22:32	alive	5/17/2010	113	EPSG:31466	3521516.5	5431239	3521433	5431155	fed	crossed	natal
HF-64545	f	9/10/2010 5:59	alive	5/17/2010	116	EPSG:31466	3521733.75	5431294.5	3521433	5431155	fed	crossed	forays
HF-64545	f	9/11/2010 11:26	alive	5/17/2010	117	EPSG:31466	3521402.25	5431161.5	3521433	5431155	fed	crossed	natal
HF-64545	f	9/12/2010 1:35	alive	5/17/2010	118	EPSG:31466	3521587.25	5431502.5	3521433	5431155	fed	crossed	forays
HF-64545	f	9/14/2010 2:45	alive	5/17/2010	120	EPSG:31466	3521606.75	5431298	3521433	5431155	fed	crossed	natal
HF-64545	f	9/16/2010 2:04	alive	5/17/2010	122	EPSG:31466	3521440.25	5431440.5	3521433	5431155	fed	crossed	natal
HF-64545	f	9/18/2010 22:25	alive	5/17/2010	124	EPSG:31466	3523644.25	5439495.5	3521433	5431155	fed	crossed	forays
HF-64545	f	9/23/2010 16:53	alive	5/17/2010	129	EPSG:31466	3518992.25	5429995.5	3521433	5431155	fed	crossed	forays
HF-64545	f	9/24/2010 13:13	alive	5/17/2010	130	EPSG:31466	3521403	5431157.5	3521433	5431155	fed	crossed	natal
HF-64545	f	9/26/2010 3:05	alive	5/17/2010	132	EPSG:31466	3521424.5	5431683	3521433	5431155	fed	crossed	forays
HF-64545	f	9/28/2010 3:05	alive	5/17/2010	134	EPSG:31466	3521236.5	5431666	3521433	5431155	fed	crossed	forays
HF-64545	f	9/30/2010 4:04	alive	5/17/2010	136	EPSG:31466	3521550.5	5431597	3521433	5431155	fed	crossed	forays
HF-64545	f	10/1/2010 15:30	alive	5/17/2010	137	EPSG:31466	3521399.5	5431158.5	3521433	5431155	fed	crossed	natal
HF-64545	f	10/2/2010 2:39	alive	5/17/2010	138	EPSG:31466	3521479	5431263.5	3521433	5431155	fed	crossed	natal
HF-64545	f	10/4/2010 4:27	alive	5/17/2010	140	EPSG:31466	3521357.5	5431621.5	3521433	5431155	fed	crossed	dispersal
HF-64545	f	10/7/2010 7:25	alive	5/17/2010	143	EPSG:31466	3521877.75	5426081	3521433	5431155	fed	crossed	dispersal
HF-64545	f	10/8/2010 0:11	alive	5/17/2010	144	EPSG:31466	3523451.75	5429897.5	3521433	5431155	fed	crossed	dispersal
HF-64545	f	10/9/2010 21:36	alive	5/17/2010	145	EPSG:31466	3521350.75	5431641	3521433	5431155	fed	crossed	dispersal
HF-64546	f	6/10/2010 17:00	alive	5/13/2010	28	EPSG:31466	3521432.75	5431155.5	3521433	5431155	fed	not_crossed	natal
HF-64546	f	7/4/2010 21:31	alive	5/13/2010	52	EPSG:31466	3521337.5	5431178	3521433	5431155	fed	not_crossed	natal
HF-64546	f	7/6/2010 17:05	alive	5/13/2010	54	EPSG:31466	3521429	5431144	3521433	5431155	fed	not_crossed	natal
HF-64546	f	7/10/2010 22:27	alive	5/13/2010	58	EPSG:31466	3521497.75	5431179	3521433	5431155	fed	not_crossed	natal
HF-64546	f	7/13/2010 23:50	alive	5/13/2010	61	EPSG:31466	3521538.25	5431194	3521433	5431155	fed	not_crossed	natal
HF-64546	f	7/15/2010 14:37	alive	5/13/2010	63	EPSG:31466	3521399.75	5431144	3521433	5431155	fed	not_crossed	natal
HF-64546	f	7/17/2010 23:28	alive	5/13/2010	65	EPSG:31466	3521377	5431140	3521433	5431155	fed	not_crossed	natal
HF-64546	f	7/20/2010 17:24	alive	5/13/2010	68	EPSG:31466	3521395.75	5431154	3521433	5431155	fed	not_crossed	natal
HF-64546	f	7/21/2010 1:13	alive	5/13/2010	69	EPSG:31466	3521424.75	5431146	3521433	5431155	fed	not_crossed	natal
HF-64546	f	7/24/2010 22:57	alive	5/13/2010	72	EPSG:31466	3521401.25	5431156	3521433	5431155	fed	not_crossed	natal
HF-64546	f	7/27/2010 23:45	alive	5/13/2010	75	EPSG:31466	3521557.25	5431197.5	3521433	5431155	fed	not_crossed	natal
HF-64546	f	7/30/2010 17:04	alive	5/13/2010	78	EPSG:31466	3521396.5	5431164	3521433	5431155	fed	not_crossed	natal
HF-64546	f	8/1/2010 1:10	alive	5/13/2010	80	EPSG:31466	3521520.75	5431241.5	3521433	5431155	fed	not_crossed	natal
HF-64546	f	8/3/2010 22:29	alive	5/13/2010	82	EPSG:31466	3521810.5	5431168	3521433	5431155	fed	not_crossed	forays
HF-64546	f	8/9/2010 23:30	alive	5/13/2010	88	EPSG:31466	3521550.25	5431228.5	3521433	5431155	fed	not_crossed	natal
HF-64546	f	8/11/2010 12:47	alive	5/13/2010	90	EPSG:31466	3521425.5	5431143	3521433	5431155	fed	not_crossed	natal
HF-64546	f	8/14/2010 1:35	alive	5/13/2010	93	EPSG:31466	3521551	5431185	3521433	5431155	fed	not_crossed	natal
HF-64546	f	8/18/2010 1:09	alive	5/13/2010	97	EPSG:31466	3521451.25	5431061.5	3521433	5431155	fed	not_crossed	natal
HF-64546	f	8/20/2010 17:39	alive	5/13/2010	99	EPSG:31466	3521356.25	5431236	3521433	5431155	fed	not_crossed	natal
HF-64546	f	8/22/2010 23:54	alive	5/13/2010	101	EPSG:31466	3521292.5	5431274.5	3521433	5431155	fed	not_crossed	natal
HF-64546	f	8/26/2010 12:10	alive	5/13/2010	105	EPSG:31466	3521397.5	5431152	3521433	5431155	fed	not_crossed	natal
HF-64546	f	8/28/2010 23:22	alive	5/13/2010	107	EPSG:31466	3521799	5431311	3521433	5431155	fed	not_crossed	forays
HF-64546	f	8/30/2010 16:40	alive	5/13/2010	109	EPSG:31466	3521394	5431159.5	3521433	5431155	fed	not_crossed	natal
HF-64546	f	9/1/2010 1:50	alive	5/13/2010	111	EPSG:31466	3521770.5	5431648	3521433	5431155	fed	not_crossed	forays
HF-64546	f	9/3/2010 3:03	alive	5/13/2010	113	EPSG:31466	3521553.5	5431154	3521433	5431155	fed	not_crossed	natal
HF-64546	f	9/5/2010 6:48	alive	5/13/2010	115	EPSG:31466	3521371.5	5431071	3521433	5431155	fed	not_crossed	natal
HF-64546	f	9/7/2010 23:02	alive	5/13/2010	117	EPSG:31466	3521352.25	5431132	3521433	5431155	fed	not_crossed	natal
HF-64546	f	9/10/2010 5:44	alive	5/13/2010	120	EPSG:31466	3521448.5	5431041.5	3521433	5431155	fed	not_crossed	natal
HF-64546	f	9/11/2010 11:24	alive	5/13/2010	121	EPSG:31466	3521400.75	5431162	3521433	5431155	fed	not_crossed	natal
HF-64546	f	9/12/2010 1:45	alive	5/13/2010	122	EPSG:31466	3521798.5	5431398	3521433	5431155	fed	not_crossed	forays
HF-64546	f	9/14/2010 2:21	alive	5/13/2010	124	EPSG:31466	3521371.75	5431153.5	3521433	5431155	fed	not_crossed	natal
HF-64546	f	9/16/2010 1:35	alive	5/13/2010	126	EPSG:31466	3521921.5	5431246.5	3521433	5431155	fed	not_crossed	forays
HF-64546	f	9/17/2010 23:32	alive	5/13/2010	127	EPSG:31466	3523259	5432319	3521433	5431155	fed	not_crossed	forays
HF-64546	f	9/18/2010 0:57	alive	5/13/2010	128	EPSG:31466	3521842.5	5431336.5	3521433	5431155	fed	not_crossed	forays
HF-64546	f	9/19/2010 13:24	alive	5/13/2010	129	EPSG:31466	3521380.25	5431154	3521433	5431155	fed	not_crossed	natal
HF-64546	f	9/20/2010 2:11	alive	5/13/2010	130	EPSG:31466	3522203	5431372.5	3521433	5431155	fed	not_crossed	forays
HF-64546	f	9/24/2010 3:18	alive	5/13/2010	134	EPSG:31466	3526877	5437084	3521433	5431155	fed	not_crossed	forays
HF-64546	f	9/26/2010 3:25	alive	5/13/2010	136	EPSG:31466	3521371	5431530.5	3521433	5431155	fed	not_crossed	forays
HF-64546	f	9/28/2010 3:20	alive	5/13/2010	138	EPSG:31466	3521330.5	5431547.5	3521433	5431155	fed	not_crossed	forays
HF-64546	f	9/30/2010 2:32	alive	5/13/2010	140	EPSG:31466	3521449	5431545.5	3521433	5431155	fed	not_crossed	forays
HF-64546	f	10/1/2010 15:28	alive	5/13/2010	141	EPSG:31466	3521399.5	5431159.5	3521433	5431155	fed	not_crossed	natal
HF-64546	f	10/2/2010 2:23	alive	5/13/2010	142	EPSG:31466	3521287.25	5431544.5	3521433	5431155	fed	not_crossed	forays
HF-64546	f	10/4/2010 3:48	alive	5/13/2010	144	EPSG:31466	3521614	5431036	3521433	5431155	fed	not_crossed	natal
HF-64546	f	10/7/2010 1:30	alive	5/13/2010	147	EPSG:31466	3521893.25	5431367.5	3521433	5431155	fed	not_crossed	forays
HF-64546	f	10/9/2010 21:12	alive	5/13/2010	149	EPSG:31466	3521370.25	5431156.5	3521433	5431155	fed	not_crossed	natal
HF-64546	f	10/12/2010 12:00	dead	5/13/2010	153	EPSG:31466	3519240.25	5414661	3521433	5431155	fed	not_crossed	dispersal
HF-64546	f	10/24/2010 15:25	alive	5/13/2010	164	EPSG:31466	3501378.5	5422351	3521433	5431155	fed	not_crossed	dispersal
HF-64546	f	10/25/2010 4:13	alive	5/13/2010	165	EPSG:31466	3501375.25	5422412	3521433	5431155	fed	not_crossed	dispersal
HF-64546	f	10/27/2010 5:22	alive	5/13/2010	167	EPSG:31466	3500402	5425699.5	3521433	5431155	fed	not_crossed	dispersal
HF-64546	f	11/2/2010 18:10	alive	5/13/2010	173	EPSG:31466	3496578	5428042.5	3521433	5431155	fed	not_crossed	dispersal
HF-64546	f	11/3/2010 15:32	alive	5/13/2010	174	EPSG:31466	3496627.75	5428150	3521433	5431155	fed	not_crossed	dispersal
HF-64546	f	11/8/2010 23:28	dead	5/13/2010	180	EPSG:31466	3496586	5428503	3521433	5431155	fed	not_crossed	dispersal
HF-64547	f	6/10/2010 17:15	alive	5/17/2010	24	EPSG:31466	3521432.75	5431155.5	3521433	5431155	fed	crossed	natal
HF-64547	f	7/4/2010 21:45	alive	5/17/2010	48	EPSG:31466	3521312.5	5431142	3521433	5431155	fed	crossed	natal
HF-64547	f	7/6/2010 17:14	alive	5/17/2010	50	EPSG:31466	3521385	5431162.5	3521433	5431155	fed	crossed	natal
HF-64547	f	7/10/2010 22:54	alive	5/17/2010	54	EPSG:31466	3521412.75	5431170	3521433	5431155	fed	crossed	natal
HF-64547	f	7/14/2010 0:13	alive	5/17/2010	58	EPSG:31466	3521426	5431147.5	3521433	5431155	fed	crossed	natal
HF-64547	f	7/15/2010 14:52	alive	5/17/2010	59	EPSG:31466	3521392	5431159.5	3521433	5431155	fed	crossed	natal
HF-64547	f	7/17/2010 23:48	alive	5/17/2010	61	EPSG:31466	3521577.25	5431172	3521433	5431155	fed	crossed	natal
HF-64547	f	7/20/2010 17:30	alive	5/17/2010	64	EPSG:31466	3521396	5431153.5	3521433	5431155	fed	crossed	natal
HF-64547	f	7/24/2010 23:47	alive	5/17/2010	68	EPSG:31466	3521713.5	5431171.5	3521433	5431155	fed	crossed	natal
HF-64547	f	7/28/2010 0:14	alive	5/17/2010	72	EPSG:31466	3521536.25	5431220	3521433	5431155	fed	crossed	natal
HF-64547	f	7/30/2010 17:27	alive	5/17/2010	74	EPSG:31466	3521395.75	5431160	3521433	5431155	fed	crossed	natal
HF-64547	f	8/1/2010 0:52	alive	5/17/2010	76	EPSG:31466	3521519.25	5431201	3521433	5431155	fed	crossed	natal
HF-64547	f	8/3/2010 22:19	alive	5/17/2010	78	EPSG:31466	3521537.5	5431229	3521433	5431155	fed	crossed	natal
HF-64547	f	8/9/2010 23:44	alive	5/17/2010	84	EPSG:31466	3521393	5431114.5	3521433	5431155	fed	crossed	natal
HF-64547	f	8/11/2010 13:09	alive	5/17/2010	86	EPSG:31466	3521423.75	5431141.5	3521433	5431155	fed	crossed	natal
HF-64547	f	8/14/2010 1:50	alive	5/17/2010	89	EPSG:31466	3521495	5431188.5	3521433	5431155	fed	crossed	natal
HF-64547	f	8/18/2010 0:49	alive	5/17/2010	93	EPSG:31466	3521416.25	5431251	3521433	5431155	fed	crossed	natal
HF-64547	f	8/20/2010 17:29	alive	5/17/2010	95	EPSG:31466	3521404.75	5431157.5	3521433	5431155	fed	crossed	natal
HF-64547	f	8/23/2010 0:12	alive	5/17/2010	98	EPSG:31466	3521543	5431234	3521433	5431155	fed	crossed	natal
HF-64547	f	8/26/2010 13:10	alive	5/17/2010	101	EPSG:31466	3521397.75	5431147	3521433	5431155	fed	crossed	natal
HF-64547	f	8/28/2010 23:35	alive	5/17/2010	103	EPSG:31466	3521651.75	5431267.5	3521433	5431155	fed	crossed	natal
HF-64547	f	8/30/2010 16:34	alive	5/17/2010	105	EPSG:31466	3521385	5431157	3521433	5431155	fed	crossed	natal
HF-64547	f	9/1/2010 2:03	alive	5/17/2010	107	EPSG:31466	3521524.25	5431237.5	3521433	5431155	fed	crossed	natal
HF-64547	f	9/3/2010 3:11	alive	5/17/2010	109	EPSG:31466	3521530.5	5431282.5	3521433	5431155	fed	crossed	natal
HF-64547	f	9/5/2010 6:19	alive	5/17/2010	111	EPSG:31466	3521363.25	5431088	3521433	5431155	fed	crossed	natal
HF-64547	f	9/7/2010 22:12	alive	5/17/2010	113	EPSG:31466	3521722.25	5431281	3521433	5431155	fed	crossed	forays
HF-64547	f	9/10/2010 6:17	alive	5/17/2010	116	EPSG:31466	3521311.75	5431097.5	3521433	5431155	fed	crossed	natal
HF-64547	f	9/11/2010 11:28	alive	5/17/2010	117	EPSG:31466	3521401.75	5431158.5	3521433	5431155	fed	crossed	natal
HF-64547	f	9/14/2010 3:04	alive	5/17/2010	120	EPSG:31466	3521768.75	5431411.5	3521433	5431155	fed	crossed	forays
HF-64547	f	9/16/2010 1:38	alive	5/17/2010	122	EPSG:31466	3521909.75	5431359	3521433	5431155	fed	crossed	forays
HF-64547	f	9/18/2010 2:16	alive	5/17/2010	124	EPSG:31466	3521507.25	5431223.5	3521433	5431155	fed	crossed	natal
HF-64547	f	9/19/2010 23:58	alive	5/17/2010	125	EPSG:31466	3521662.75	5431453.5	3521433	5431155	fed	crossed	dispersal
HF-64547	f	9/20/2010 0:03	alive	5/17/2010	126	EPSG:31466	3521660	5431429	3521433	5431155	fed	crossed	dispersal
HF-64547	f	9/21/2010 22:15	alive	5/17/2010	127	EPSG:31466	3521794.25	5431302.5	3521433	5431155	fed	crossed	dispersal
HF-64547	f	9/23/2010 22:55	alive	5/17/2010	129	EPSG:31466	3520981.5	5431722.5	3521433	5431155	fed	crossed	dispersal
HF-64547	f	9/26/2010 17:26	alive	5/17/2010	132	EPSG:31466	3517719.75	5430345	3521433	5431155	fed	crossed	dispersal
HF-64547	f	9/27/2010 4:42	alive	5/17/2010	133	EPSG:31466	3517713	5430383	3521433	5431155	fed	crossed	dispersal
HF-64547	f	9/28/2010 0:01	alive	5/17/2010	134	EPSG:31466	3517830.25	5430500	3521433	5431155	fed	crossed	dispersal
HF-64547	f	9/30/2010 6:18	alive	5/17/2010	136	EPSG:31466	3517796.5	5430402	3521433	5431155	fed	crossed	dispersal
HF-64547	f	10/1/2010 17:11	alive	5/17/2010	137	EPSG:31466	3517800.25	5430373.5	3521433	5431155	fed	crossed	dispersal
HF-64547	f	10/2/2010 3:24	alive	5/17/2010	138	EPSG:31466	3516363.25	5429837.5	3521433	5431155	fed	crossed	dispersal
HF-64547	f	10/3/2010 23:34	alive	5/17/2010	139	EPSG:31466	3514105.75	5432139.5	3521433	5431155	fed	crossed	dispersal
HF-64547	f	10/6/2010 23:32	alive	5/17/2010	142	EPSG:31466	3514953.75	5433827.5	3521433	5431155	fed	crossed	dispersal
HF-64547	f	10/7/2010 15:17	alive	5/17/2010	143	EPSG:31466	3514145.25	5433486.5	3521433	5431155	fed	crossed	dispersal
HF-64547	f	10/8/2010 4:15	alive	5/17/2010	144	EPSG:31466	3514704.5	5431797.5	3521433	5431155	fed	crossed	dispersal
HF-64547	f	10/9/2010 0:05	alive	5/17/2010	145	EPSG:31466	3512866	5433253	3521433	5431155	fed	crossed	dispersal
HF-64547	f	10/20/2010 23:57	alive	5/17/2010	156	EPSG:31466	3508293.75	5442476	3521433	5431155	fed	crossed	dispersal
HF-64547	f	10/21/2010 19:11	alive	5/17/2010	157	EPSG:31466	3507851.75	5442978.5	3521433	5431155	fed	crossed	dispersal
HF-64547	f	10/25/2010 2:16	alive	5/17/2010	161	EPSG:31466	3507755.75	5442975.5	3521433	5431155	fed	crossed	dispersal
HF-64547	f	10/28/2010 23:24	alive	5/17/2010	164	EPSG:31466	3507793.5	5443084.5	3521433	5431155	fed	crossed	dispersal
HF-64547	f	11/30/2010 14:14	alive	5/17/2010	197	EPSG:31466	3510170.75	5413708.5	3521433	5431155	fed	crossed	dispersal
HF-64547	f	12/14/2010 2:15	dead	5/17/2010	212	EPSG:31466	3509907.75	5413392	3521433	5431155	fed	crossed	dispersal
HF-64548	m	6/11/2010 18:30	alive	5/18/2010	24	EPSG:31466	3515937.75	5431458	3515938	5431458	unfed	not_crossed	natal
HF-64548	m	6/30/2010 10:50	alive	5/18/2010	43	EPSG:31466	3515955.75	5431439.5	3515938	5431458	unfed	not_crossed	natal
HF-64548	m	7/4/2010 19:40	alive	5/18/2010	47	EPSG:31466	3515958	5431434.5	3515938	5431458	unfed	not_crossed	natal
HF-64548	m	7/6/2010 15:21	alive	5/18/2010	49	EPSG:31466	3515952	5431457	3515938	5431458	unfed	not_crossed	natal
HF-64548	m	7/10/2010 21:48	alive	5/18/2010	53	EPSG:31466	3515962.5	5431461	3515938	5431458	unfed	not_crossed	natal
HF-64548	m	7/13/2010 22:22	alive	5/18/2010	56	EPSG:31466	3515929.75	5431457	3515938	5431458	unfed	not_crossed	natal
HF-64548	m	7/14/2010 16:54	alive	5/18/2010	57	EPSG:31466	3515958.25	5431456	3515938	5431458	unfed	not_crossed	natal
HF-64548	m	7/18/2010 2:00	alive	5/18/2010	61	EPSG:31466	3515810.25	5431486	3515938	5431458	unfed	not_crossed	natal
HF-64548	m	7/20/2010 22:48	alive	5/18/2010	63	EPSG:31466	3515794.75	5431526	3515938	5431458	unfed	not_crossed	natal
HF-64548	m	7/21/2010 17:13	alive	5/18/2010	64	EPSG:31466	3516003	5431468.5	3515938	5431458	unfed	not_crossed	natal
HF-64548	m	7/24/2010 21:51	alive	5/18/2010	67	EPSG:31466	3516040.25	5431473.5	3515938	5431458	unfed	not_crossed	natal
HF-64548	m	7/26/2010 13:57	alive	5/18/2010	69	EPSG:31466	3515954.75	5431459.5	3515938	5431458	unfed	not_crossed	natal
HF-64548	m	7/28/2010 2:34	alive	5/18/2010	71	EPSG:31466	3515797.75	5431471	3515938	5431458	unfed	not_crossed	natal
HF-64548	m	8/1/2010 1:20	alive	5/18/2010	75	EPSG:31466	3515814.25	5431483.5	3515938	5431458	unfed	not_crossed	natal
HF-64548	m	8/3/2010 22:36	alive	5/18/2010	77	EPSG:31466	3515657.5	5431664.5	3515938	5431458	unfed	not_crossed	forays
HF-64548	m	8/4/2010 18:42	alive	5/18/2010	78	EPSG:31466	3515953.5	5431458	3515938	5431458	unfed	not_crossed	natal
HF-64548	m	8/10/2010 2:46	alive	5/18/2010	84	EPSG:31466	3515810.5	5431292.5	3515938	5431458	unfed	not_crossed	natal
HF-64548	m	8/11/2010 15:26	alive	5/18/2010	85	EPSG:31466	3515956.5	5431471.5	3515938	5431458	unfed	not_crossed	natal
HF-64548	m	8/13/2010 21:55	alive	5/18/2010	87	EPSG:31466	3515777.5	5431590	3515938	5431458	unfed	not_crossed	natal
HF-64548	m	8/18/2010 0:01	alive	5/18/2010	92	EPSG:31466	3515681	5432051	3515938	5431458	unfed	not_crossed	forays
HF-64548	m	8/20/2010 15:14	alive	5/18/2010	94	EPSG:31466	3515952.5	5431459.5	3515938	5431458	unfed	not_crossed	natal
HF-64548	m	8/21/2010 23:57	alive	5/18/2010	95	EPSG:31466	3514627	5432510	3515938	5431458	unfed	not_crossed	forays
HF-64548	m	8/26/2010 23:12	alive	5/18/2010	100	EPSG:31466	3516203.75	5430888	3515938	5431458	unfed	not_crossed	forays
HF-64548	m	8/27/2010 11:26	alive	5/18/2010	101	EPSG:31466	3515949.5	5431465	3515938	5431458	unfed	not_crossed	natal
HF-64548	m	8/29/2010 23:02	alive	5/18/2010	103	EPSG:31466	3515411.75	5431601.5	3515938	5431458	unfed	not_crossed	forays
HF-64548	m	8/30/2010 12:08	alive	5/18/2010	104	EPSG:31466	3515942.75	5431465	3515938	5431458	unfed	not_crossed	natal
HF-64548	m	9/2/2010 23:31	alive	5/18/2010	107	EPSG:31466	3514829.75	5432299.5	3515938	5431458	unfed	not_crossed	forays
HF-64548	m	9/5/2010 3:59	alive	5/18/2010	110	EPSG:31466	3514439	5432073.5	3515938	5431458	unfed	not_crossed	forays
HF-64548	m	9/8/2010 2:07	alive	5/18/2010	113	EPSG:31466	3515311.75	5431871	3515938	5431458	unfed	not_crossed	forays
HF-64548	m	9/10/2010 0:24	alive	5/18/2010	115	EPSG:31466	3515236.75	5432035	3515938	5431458	unfed	not_crossed	forays
HF-64548	m	9/11/2010 12:22	alive	5/18/2010	116	EPSG:31466	3515994.25	5431466.5	3515938	5431458	unfed	not_crossed	natal
HF-64548	m	9/12/2010 5:16	alive	5/18/2010	117	EPSG:31466	3515387.25	5431997	3515938	5431458	unfed	not_crossed	forays
HF-64548	m	9/14/2010 5:15	alive	5/18/2010	119	EPSG:31466	3515255.5	5432078	3515938	5431458	unfed	not_crossed	forays
HF-64548	m	9/16/2010 4:12	alive	5/18/2010	121	EPSG:31466	3515110.25	5432345.5	3515938	5431458	unfed	not_crossed	forays
HF-64548	m	9/19/2010 1:01	alive	5/18/2010	124	EPSG:31466	3515329.25	5431767.5	3515938	5431458	unfed	not_crossed	forays
HF-64548	m	9/20/2010 12:44	alive	5/18/2010	125	EPSG:31466	3515992.25	5431493.5	3515938	5431458	unfed	not_crossed	natal
HF-64548	m	9/28/2010 23:59	alive	5/18/2010	133	EPSG:31466	3517555	5426309.5	3515938	5431458	unfed	not_crossed	dispersal
HF-64548	m	9/29/2010 0:09	alive	5/18/2010	134	EPSG:31466	3517550.75	5426299.5	3515938	5431458	unfed	not_crossed	dispersal
HF-64548	m	9/30/2010 0:03	alive	5/18/2010	135	EPSG:31466	3517791	5426254	3515938	5431458	unfed	not_crossed	dispersal
HF-64548	m	10/1/2010 13:29	alive	5/18/2010	136	EPSG:31466	3517361.5	5426499.5	3515938	5431458	unfed	not_crossed	dispersal
HF-64548	m	10/2/2010 1:58	alive	5/18/2010	137	EPSG:31466	3517348.75	5426440.5	3515938	5431458	unfed	not_crossed	dispersal
HF-64548	m	10/6/2010 23:35	alive	5/18/2010	141	EPSG:31466	3517386.75	5426412	3515938	5431458	unfed	not_crossed	dispersal
HF-64548	m	10/9/2010 23:08	alive	5/18/2010	144	EPSG:31466	3517825	5426372.5	3515938	5431458	unfed	not_crossed	dispersal
HF-64548	m	10/13/2010 0:13	alive	5/18/2010	148	EPSG:31466	3517513.75	5426133	3515938	5431458	unfed	not_crossed	dispersal
HF-64548	m	10/17/2010 18:36	alive	5/18/2010	152	EPSG:31466	3517307.5	5426192.5	3515938	5431458	unfed	not_crossed	dispersal
HF-64548	m	10/21/2010 1:40	alive	5/18/2010	156	EPSG:31466	3517119	5426203.5	3515938	5431458	unfed	not_crossed	dispersal
HF-64548	m	10/25/2010 0:54	alive	5/18/2010	160	EPSG:31466	3516872	5426328	3515938	5431458	unfed	not_crossed	dispersal
HF-64548	m	10/29/2010 2:11	alive	5/18/2010	164	EPSG:31466	3517412.75	5426219.5	3515938	5431458	unfed	not_crossed	dispersal
HF-64548	m	11/5/2010 22:50	alive	5/18/2010	171	EPSG:31466	3517285.5	5426226.5	3515938	5431458	unfed	not_crossed	dispersal
HF-64548	m	11/8/2010 15:00	alive	5/18/2010	174	EPSG:31466	3517250.5	5426253.5	3515938	5431458	unfed	not_crossed	dispersal
HF-64548	m	11/16/2010 22:20	alive	5/18/2010	182	EPSG:31466	3517423.75	5426143.5	3515938	5431458	unfed	not_crossed	dispersal
HF-64548	m	11/23/2010 4:31	alive	5/18/2010	189	EPSG:31466	3517325	5426203.5	3515938	5431458	unfed	not_crossed	dispersal
HF-64548	m	11/29/2010 12:55	alive	5/18/2010	195	EPSG:31466	3517247.25	5426254.5	3515938	5431458	unfed	not_crossed	dispersal
HF-64548	m	12/12/2010 17:22	alive	5/18/2010	208	EPSG:31466	3517582.75	5426208.5	3515938	5431458	unfed	not_crossed	dispersal
HF-64548	m	12/17/2010 23:57	alive	5/18/2010	213	EPSG:31466	3517413.25	5426216.5	3515938	5431458	unfed	not_crossed	dispersal
HF-64548	m	12/20/2010 15:20	alive	5/18/2010	216	EPSG:31466	3517311.5	5426206	3515938	5431458	unfed	not_crossed	dispersal
HF-64548	m	12/29/2010 0:35	alive	5/18/2010	225	EPSG:31466	3517326.75	5426222.5	3515938	5431458	unfed	not_crossed	dispersal
HF-64548	m	1/11/2011 1:49	alive	5/18/2010	238	EPSG:31466	3517386	5426242.5	3515938	5431458	unfed	not_crossed	dispersal
HF-64548	m	1/22/2011 7:31	alive	5/18/2010	249	EPSG:31466	3517304.5	5426205.5	3515938	5431458	unfed	not_crossed	dispersal
HF-64548	m	1/28/2011 23:00	alive	5/18/2010	255	EPSG:31466	3517228.5	5426292.5	3515938	5431458	unfed	not_crossed	dispersal
HF-64548	m	2/2/2011 18:55	alive	5/18/2010	260	EPSG:31466	3517401.75	5426096.5	3515938	5431458	unfed	not_crossed	dispersal
HF-64548	m	2/8/2011 14:18	alive	5/18/2010	266	EPSG:31466	3517314.75	5426203	3515938	5431458	unfed	not_crossed	dispersal
HF-64548	m	2/12/2011 21:25	alive	5/18/2010	270	EPSG:31466	3517529.75	5425288.5	3515938	5431458	unfed	not_crossed	dispersal
HF-64548	m	2/15/2011 13:59	alive	5/18/2010	273	EPSG:31466	3517482.5	5424963	3515938	5431458	unfed	not_crossed	dispersal
HF-64548	m	2/17/2011 1:31	alive	5/18/2010	275	EPSG:31466	3517735.25	5425000	3515938	5431458	unfed	not_crossed	dispersal
HF-64548	m	2/19/2011 5:27	alive	5/18/2010	277	EPSG:31466	3517321.25	5425149	3515938	5431458	unfed	not_crossed	dispersal
HF-64548	m	2/20/2011 10:42	alive	5/18/2010	278	EPSG:31466	3517658.5	5424936.5	3515938	5431458	unfed	not_crossed	dispersal
HF-64548	m	3/4/2011 15:05	dead	5/18/2010	291	EPSG:31466	3516943.75	5424345	3515938	5431458	unfed	not_crossed	dispersal
HF-64549	m	6/11/2010 19:00	alive	5/15/2010	27	EPSG:31466	3515937.75	5431458	3515938	5431458	unfed	crossed	natal
HF-64549	m	6/30/2010 10:49	alive	5/15/2010	46	EPSG:31466	3515944.5	5431448	3515938	5431458	unfed	crossed	natal
HF-64549	m	7/4/2010 19:39	alive	5/15/2010	50	EPSG:31466	3515955	5431435	3515938	5431458	unfed	crossed	natal
HF-64549	m	7/6/2010 15:23	alive	5/15/2010	52	EPSG:31466	3515950	5431455.5	3515938	5431458	unfed	crossed	natal
HF-64549	m	7/10/2010 22:09	alive	5/15/2010	56	EPSG:31466	3516068.25	5431393.5	3515938	5431458	unfed	crossed	natal
HF-64549	m	7/13/2010 22:39	alive	5/15/2010	59	EPSG:31466	3515811.5	5431507	3515938	5431458	unfed	crossed	natal
HF-64549	m	7/14/2010 16:28	alive	5/15/2010	60	EPSG:31466	3516003	5431475.5	3515938	5431458	unfed	crossed	natal
HF-64549	m	7/18/2010 2:11	alive	5/15/2010	64	EPSG:31466	3515805.75	5431479	3515938	5431458	unfed	crossed	natal
HF-64549	m	7/20/2010 23:01	alive	5/15/2010	66	EPSG:31466	3515793.75	5431505	3515938	5431458	unfed	crossed	natal
HF-64549	m	7/21/2010 17:18	alive	5/15/2010	67	EPSG:31466	3515993.5	5431463.5	3515938	5431458	unfed	crossed	natal
HF-64549	m	7/24/2010 22:06	alive	5/15/2010	70	EPSG:31466	3515867.75	5431371.5	3515938	5431458	unfed	crossed	natal
HF-64549	m	7/26/2010 14:21	alive	5/15/2010	72	EPSG:31466	3515962.25	5431457	3515938	5431458	unfed	crossed	natal
HF-64549	m	7/28/2010 3:13	alive	5/15/2010	74	EPSG:31466	3515430	5431514	3515938	5431458	unfed	crossed	forays
HF-64549	m	8/1/2010 1:48	alive	5/15/2010	78	EPSG:31466	3515734.75	5431313	3515938	5431458	unfed	crossed	natal
HF-64549	m	8/3/2010 22:19	alive	5/15/2010	80	EPSG:31466	3515645.25	5431568.5	3515938	5431458	unfed	crossed	forays
HF-64549	m	8/4/2010 18:43	alive	5/15/2010	81	EPSG:31466	3515960.75	5431456	3515938	5431458	unfed	crossed	natal
HF-64549	m	8/10/2010 3:06	alive	5/15/2010	87	EPSG:31466	3515490.75	5431253	3515938	5431458	unfed	crossed	forays
HF-64549	m	8/11/2010 15:48	alive	5/15/2010	88	EPSG:31466	3515939	5431471	3515938	5431458	unfed	crossed	natal
HF-64549	m	8/13/2010 22:40	alive	5/15/2010	90	EPSG:31466	3514947.5	5431854	3515938	5431458	unfed	crossed	forays
HF-64549	m	8/18/2010 0:27	alive	5/15/2010	95	EPSG:31466	3515745	5431472	3515938	5431458	unfed	crossed	natal
HF-64549	m	8/20/2010 15:24	alive	5/15/2010	97	EPSG:31466	3516002.25	5431473.5	3515938	5431458	unfed	crossed	natal
HF-64549	m	8/22/2010 0:55	alive	5/15/2010	99	EPSG:31466	3515278.25	5432340	3515938	5431458	unfed	crossed	dispersal
HF-64549	m	8/30/2010 10:20	alive	5/15/2010	107	EPSG:31466	3510493.5	5431989	3515938	5431458	unfed	crossed	dispersal
HF-64549	m	9/1/2010 4:23	alive	5/15/2010	109	EPSG:31466	3508859	5431170.5	3515938	5431458	unfed	crossed	dispersal
HF-64549	m	9/3/2010 5:55	alive	5/15/2010	111	EPSG:31466	3505014.5	5434546	3515938	5431458	unfed	crossed	dispersal
HF-64549	m	9/5/2010 22:34	alive	5/15/2010	113	EPSG:31466	3505905.5	5433940	3515938	5431458	unfed	crossed	dispersal
HF-64549	m	9/8/2010 1:05	alive	5/15/2010	116	EPSG:31466	3505841.5	5433976	3515938	5431458	unfed	crossed	dispersal
HF-64549	m	9/9/2010 22:16	alive	5/15/2010	117	EPSG:31466	3505054.5	5433350	3515938	5431458	unfed	crossed	dispersal
HF-64549	m	9/12/2010 1:14	alive	5/15/2010	120	EPSG:31466	3505598	5433743	3515938	5431458	unfed	crossed	dispersal
HF-64549	m	9/15/2010 18:06	alive	5/15/2010	123	EPSG:31466	3506361.75	5433024.5	3515938	5431458	unfed	crossed	dispersal
HF-64549	m	9/16/2010 4:59	alive	5/15/2010	124	EPSG:31466	3505477.5	5433652	3515938	5431458	unfed	crossed	dispersal
HF-64549	m	9/18/2010 3:47	alive	5/15/2010	126	EPSG:31466	3505672	5432487	3515938	5431458	unfed	crossed	dispersal
HF-64549	m	9/19/2010 10:06	alive	5/15/2010	127	EPSG:31466	3506507.5	5433028.5	3515938	5431458	unfed	crossed	dispersal
HF-64549	m	9/22/2010 2:15	alive	5/15/2010	130	EPSG:31466	3505572.25	5433709	3515938	5431458	unfed	crossed	dispersal
HF-64549	m	9/25/2010 22:35	alive	5/15/2010	133	EPSG:31466	3505284.5	5433654	3515938	5431458	unfed	crossed	dispersal
HF-64549	m	9/28/2010 16:43	alive	5/15/2010	136	EPSG:31466	3505945.75	5433862	3515938	5431458	unfed	crossed	dispersal
HF-64549	m	9/29/2010 23:59	alive	5/15/2010	137	EPSG:31466	3505212.5	5433652	3515938	5431458	unfed	crossed	dispersal
HF-64549	m	9/30/2010 0:04	alive	5/15/2010	138	EPSG:31466	3505297.75	5433791.5	3515938	5431458	unfed	crossed	dispersal
HF-64549	m	10/3/2010 22:12	alive	5/15/2010	141	EPSG:31466	3505898.5	5434140	3515938	5431458	unfed	crossed	dispersal
HF-64549	m	10/6/2010 1:10	alive	5/15/2010	144	EPSG:31466	3505959	5433859	3515938	5431458	unfed	crossed	dispersal
HF-64549	m	10/10/2010 2:40	alive	5/15/2010	148	EPSG:31466	3505101.75	5433530	3515938	5431458	unfed	crossed	dispersal
HF-64549	m	10/12/2010 23:39	alive	5/15/2010	150	EPSG:31466	3505171.5	5433756.5	3515938	5431458	unfed	crossed	dispersal
HF-64549	m	10/18/2010 3:13	alive	5/15/2010	156	EPSG:31466	3505356.5	5433800.5	3515938	5431458	unfed	crossed	dispersal
HF-64549	m	10/20/2010 22:18	alive	5/15/2010	158	EPSG:31466	3505223.25	5434102	3515938	5431458	unfed	crossed	dispersal
HF-64549	m	10/21/2010 15:45	alive	5/15/2010	159	EPSG:31466	3505959	5433860	3515938	5431458	unfed	crossed	dispersal
HF-64549	m	10/25/2010 3:24	alive	5/15/2010	163	EPSG:31466	3505731.75	5434351.5	3515938	5431458	unfed	crossed	dispersal
HF-64549	m	10/29/2010 0:49	alive	5/15/2010	167	EPSG:31466	3506014.5	5433759.5	3515938	5431458	unfed	crossed	dispersal
HF-64549	m	11/4/2010 17:37	alive	5/15/2010	173	EPSG:31466	3505935.75	5433886.5	3515938	5431458	unfed	crossed	dispersal
HF-64549	m	11/5/2010 12:38	alive	5/15/2010	174	EPSG:31466	3505932	5433760.5	3515938	5431458	unfed	crossed	dispersal
HF-64549	m	11/15/2010 20:32	alive	5/15/2010	184	EPSG:31466	3506032	5433721	3515938	5431458	unfed	crossed	dispersal
HF-64549	m	11/16/2010 9:40	alive	5/15/2010	185	EPSG:31466	3506017.75	5433714.5	3515938	5431458	unfed	crossed	dispersal
HF-64549	m	11/22/2010 0:44	alive	5/15/2010	191	EPSG:31466	3505552	5433942.5	3515938	5431458	unfed	crossed	dispersal
HF-64549	m	11/24/2010 16:29	alive	5/15/2010	193	EPSG:31466	3506017.5	5433724.5	3515938	5431458	unfed	crossed	dispersal
HF-64549	m	11/29/2010 9:45	alive	5/15/2010	198	EPSG:31466	3506014	5433722.5	3515938	5431458	unfed	crossed	dispersal
HF-64549	m	12/2/2010 3:49	alive	5/15/2010	201	EPSG:31466	3506068.25	5433704.5	3515938	5431458	unfed	crossed	dispersal
HF-64549	m	12/16/2010 19:04	alive	5/15/2010	215	EPSG:31466	3505729.5	5434095.5	3515938	5431458	unfed	crossed	dispersal
HF-64549	m	12/29/2010 6:21	alive	5/15/2010	228	EPSG:31466	3505956	5433850	3515938	5431458	unfed	crossed	dispersal
HF-64549	m	1/21/2011 4:29	dead	5/15/2010	252	EPSG:31466	3506335.25	5432850	3515938	5431458	unfed	crossed	dispersal
HF-64550	f	6/11/2010 17:45	alive	5/15/2010	27	EPSG:31466	3515937.75	5431458	3515938	5431458	unfed	crossed	natal
HF-64550	f	6/30/2010 10:51	alive	5/15/2010	46	EPSG:31466	3515957	5431435.5	3515938	5431458	unfed	crossed	natal
HF-64550	f	7/4/2010 19:41	alive	5/15/2010	50	EPSG:31466	3515953.5	5431435	3515938	5431458	unfed	crossed	natal
HF-64550	f	7/6/2010 15:24	alive	5/15/2010	52	EPSG:31466	3515948.25	5431454.5	3515938	5431458	unfed	crossed	natal
HF-64550	f	7/10/2010 22:16	alive	5/15/2010	56	EPSG:31466	3516066.75	5431388.5	3515938	5431458	unfed	crossed	natal
HF-64550	f	7/13/2010 22:27	alive	5/15/2010	59	EPSG:31466	3515785.5	5431510.5	3515938	5431458	unfed	crossed	natal
HF-64550	f	7/14/2010 16:35	alive	5/15/2010	60	EPSG:31466	3516005.25	5431466.5	3515938	5431458	unfed	crossed	natal
HF-64550	f	7/18/2010 2:27	alive	5/15/2010	64	EPSG:31466	3515805.75	5431482	3515938	5431458	unfed	crossed	natal
HF-64550	f	7/20/2010 23:13	alive	5/15/2010	66	EPSG:31466	3515797.75	5431512.5	3515938	5431458	unfed	crossed	natal
HF-64550	f	7/21/2010 17:20	alive	5/15/2010	67	EPSG:31466	3515955	5431461.5	3515938	5431458	unfed	crossed	natal
HF-64550	f	7/24/2010 22:14	alive	5/15/2010	70	EPSG:31466	3515867.75	5431383	3515938	5431458	unfed	crossed	natal
HF-64550	f	7/26/2010 14:40	alive	5/15/2010	72	EPSG:31466	3515989.75	5431457	3515938	5431458	unfed	crossed	natal
HF-64550	f	7/28/2010 2:37	alive	5/15/2010	74	EPSG:31466	3515743	5431390.5	3515938	5431458	unfed	crossed	natal
HF-64550	f	8/1/2010 1:35	alive	5/15/2010	78	EPSG:31466	3515463	5431275	3515938	5431458	unfed	crossed	forays
HF-64550	f	8/3/2010 23:25	alive	5/15/2010	80	EPSG:31466	3515120.5	5431645.5	3515938	5431458	unfed	crossed	forays
HF-64550	f	8/4/2010 0:30	alive	5/15/2010	81	EPSG:31466	3515164.75	5431643.5	3515938	5431458	unfed	crossed	forays
HF-64550	f	8/10/2010 2:36	alive	5/15/2010	87	EPSG:31466	3515674.25	5431336	3515938	5431458	unfed	crossed	natal
HF-64550	f	8/11/2010 15:54	alive	5/15/2010	88	EPSG:31466	3515991.25	5431469	3515938	5431458	unfed	crossed	natal
HF-64550	f	8/13/2010 22:15	alive	5/15/2010	90	EPSG:31466	3515723	5431414.5	3515938	5431458	unfed	crossed	natal
HF-64550	f	8/18/2010 0:59	alive	5/15/2010	95	EPSG:31466	3515488.25	5431236	3515938	5431458	unfed	crossed	forays
HF-64550	f	8/20/2010 15:29	alive	5/15/2010	97	EPSG:31466	3515995.5	5431461	3515938	5431458	unfed	crossed	natal
HF-64550	f	8/22/2010 0:12	alive	5/15/2010	99	EPSG:31466	3515320.25	5432048	3515938	5431458	unfed	crossed	forays
HF-64550	f	8/27/2010 2:30	alive	5/15/2010	104	EPSG:31466	3513359.5	5432726	3515938	5431458	unfed	crossed	forays
HF-64550	f	8/30/2010 12:06	alive	5/15/2010	107	EPSG:31466	3515960.25	5431465	3515938	5431458	unfed	crossed	natal
HF-64555	m	6/5/2010 16:20	alive	5/10/2010	26	EPSG:31466	3507825.75	5417050	3507826	5417050	unfed	not_crossed	natal
HF-64555	m	6/29/2010 22:37	alive	5/10/2010	50	EPSG:31466	3507863.5	5416924.5	3507826	5417050	unfed	not_crossed	natal
HF-64555	m	7/3/2010 23:38	alive	5/10/2010	54	EPSG:31466	3507962.75	5417098.5	3507826	5417050	unfed	not_crossed	natal
HF-64555	m	7/10/2010 12:53	alive	5/10/2010	61	EPSG:31466	3507859.75	5416974	3507826	5417050	unfed	not_crossed	natal
HF-64555	m	7/12/2010 15:44	alive	5/10/2010	63	EPSG:31466	3507872.5	5416986	3507826	5417050	unfed	not_crossed	natal
HF-64555	m	7/13/2010 1:33	alive	5/10/2010	64	EPSG:31466	3507852.75	5417006	3507826	5417050	unfed	not_crossed	natal
HF-64555	m	7/16/2010 23:23	alive	5/10/2010	67	EPSG:31466	3507845	5416919	3507826	5417050	unfed	not_crossed	natal
HF-64555	m	7/19/2010 17:02	alive	5/10/2010	70	EPSG:31466	3507853.5	5416918	3507826	5417050	unfed	not_crossed	natal
HF-64555	m	7/20/2010 2:04	alive	5/10/2010	71	EPSG:31466	3507842.5	5416965.5	3507826	5417050	unfed	not_crossed	natal
HF-64555	m	7/22/2010 22:06	alive	5/10/2010	73	EPSG:31466	3507852.25	5416928.5	3507826	5417050	unfed	not_crossed	natal
HF-64555	m	7/26/2010 16:28	alive	5/10/2010	77	EPSG:31466	3507876.5	5416980.5	3507826	5417050	unfed	not_crossed	natal
HF-64555	m	7/27/2010 2:47	alive	5/10/2010	78	EPSG:31466	3507859.75	5416926.5	3507826	5417050	unfed	not_crossed	natal
HF-64555	m	7/31/2010 0:37	alive	5/10/2010	82	EPSG:31466	3507837.5	5416935.5	3507826	5417050	unfed	not_crossed	natal
HF-64555	m	8/2/2010 18:04	alive	5/10/2010	84	EPSG:31466	3507855.75	5416919	3507826	5417050	unfed	not_crossed	natal
HF-64555	m	8/3/2010 2:51	alive	5/10/2010	85	EPSG:31466	3507868.25	5416921	3507826	5417050	unfed	not_crossed	natal
HF-64555	m	8/6/2010 23:18	alive	5/10/2010	88	EPSG:31466	3508024.5	5417140.5	3507826	5417050	unfed	not_crossed	natal
HF-64555	m	8/10/2010 22:04	alive	5/10/2010	92	EPSG:31466	3507703.25	5417048.5	3507826	5417050	unfed	not_crossed	natal
HF-64555	m	8/11/2010 20:01	alive	5/10/2010	93	EPSG:31466	3507863.25	5416974.5	3507826	5417050	unfed	not_crossed	natal
HF-64555	m	8/12/2010 22:19	alive	5/10/2010	94	EPSG:31466	3507865	5416921	3507826	5417050	unfed	not_crossed	natal
HF-64555	m	8/13/2010 13:06	alive	5/10/2010	95	EPSG:31466	3507854.5	5416977.5	3507826	5417050	unfed	not_crossed	natal
HF-64555	m	8/17/2010 0:42	alive	5/10/2010	99	EPSG:31466	3507781	5416761	3507826	5417050	unfed	not_crossed	natal
HF-64555	m	8/18/2010 19:01	alive	5/10/2010	100	EPSG:31466	3507876	5416985	3507826	5417050	unfed	not_crossed	natal
HF-64555	m	8/20/2010 23:18	alive	5/10/2010	102	EPSG:31466	3508720.5	5417415	3507826	5417050	unfed	not_crossed	dispersal
HF-64555	m	9/11/2010 0:38	alive	5/10/2010	124	EPSG:31466	3511419.75	5413465	3507826	5417050	unfed	not_crossed	dispersal
HF-64555	m	9/13/2010 3:13	alive	5/10/2010	126	EPSG:31466	3509842.25	5413111.5	3507826	5417050	unfed	not_crossed	dispersal
HF-64555	m	9/15/2010 15:42	alive	5/10/2010	128	EPSG:31466	3512004.75	5416372	3507826	5417050	unfed	not_crossed	dispersal
HF-64555	m	9/16/2010 22:21	alive	5/10/2010	129	EPSG:31466	3509871.75	5416110	3507826	5417050	unfed	not_crossed	dispersal
HF-64555	m	9/17/2010 21:55	alive	5/10/2010	130	EPSG:31466	3509980.5	5416224	3507826	5417050	unfed	not_crossed	dispersal
HF-64555	m	9/19/2010 23:41	alive	5/10/2010	132	EPSG:31466	3510961.75	5416224	3507826	5417050	unfed	not_crossed	dispersal
HF-64555	m	9/20/2010 0:11	alive	5/10/2010	133	EPSG:31466	3511111.75	5416034.5	3507826	5417050	unfed	not_crossed	dispersal
HF-64555	m	9/21/2010 11:53	alive	5/10/2010	134	EPSG:31466	3511776.75	5416277.5	3507826	5417050	unfed	not_crossed	dispersal
HF-64555	m	9/22/2010 21:57	alive	5/10/2010	135	EPSG:31466	3510871	5415788.5	3507826	5417050	unfed	not_crossed	dispersal
HF-64555	m	9/25/2010 4:11	alive	5/10/2010	138	EPSG:31466	3511112.5	5416036.5	3507826	5417050	unfed	not_crossed	dispersal
HF-64555	m	9/26/2010 22:26	alive	5/10/2010	139	EPSG:31466	3510441.25	5416326.5	3507826	5417050	unfed	not_crossed	dispersal
HF-64555	m	9/30/2010 21:54	alive	5/10/2010	143	EPSG:31466	3510295.75	5416112.5	3507826	5417050	unfed	not_crossed	dispersal
HF-64555	m	10/4/2010 21:36	alive	5/10/2010	147	EPSG:31466	3510304.25	5416116.5	3507826	5417050	unfed	not_crossed	dispersal
HF-64555	m	10/11/2010 2:29	alive	5/10/2010	154	EPSG:31466	3510400.25	5416364	3507826	5417050	unfed	not_crossed	dispersal
HF-64555	m	10/14/2010 1:22	alive	5/10/2010	157	EPSG:31466	3510373	5416227	3507826	5417050	unfed	not_crossed	dispersal
HF-64555	m	10/18/2010 22:11	alive	5/10/2010	161	EPSG:31466	3510394	5416381.5	3507826	5417050	unfed	not_crossed	dispersal
HF-64555	m	10/23/2010 3:25	alive	5/10/2010	166	EPSG:31466	3510446.75	5416321.5	3507826	5417050	unfed	not_crossed	dispersal
HF-64555	m	10/26/2010 4:30	alive	5/10/2010	169	EPSG:31466	3510521.75	5416089.5	3507826	5417050	unfed	not_crossed	dispersal
HF-64555	m	11/3/2010 2:19	alive	5/10/2010	177	EPSG:31466	3510389.5	5416373	3507826	5417050	unfed	not_crossed	dispersal
HF-64555	m	11/5/2010 15:16	alive	5/10/2010	179	EPSG:31466	3509984.5	5416580	3507826	5417050	unfed	not_crossed	dispersal
HF-64555	m	11/6/2010 21:30	alive	5/10/2010	180	EPSG:31466	3510387.75	5416086.5	3507826	5417050	unfed	not_crossed	dispersal
HF-64555	m	11/17/2010 21:37	alive	5/10/2010	191	EPSG:31466	3510381	5416268	3507826	5417050	unfed	not_crossed	dispersal
HF-64555	m	11/21/2010 12:35	alive	5/10/2010	195	EPSG:31466	3510396.25	5416352.5	3507826	5417050	unfed	not_crossed	dispersal
HF-64555	m	11/24/2010 5:11	alive	5/10/2010	198	EPSG:31466	3510387.75	5416342	3507826	5417050	unfed	not_crossed	dispersal
HF-64555	m	11/30/2010 10:02	alive	5/10/2010	204	EPSG:31466	3510394.25	5416356	3507826	5417050	unfed	not_crossed	dispersal
HF-64555	m	12/14/2010 1:13	alive	5/10/2010	218	EPSG:31466	3510346.25	5416070	3507826	5417050	unfed	not_crossed	dispersal
HF-64555	m	12/15/2010 14:51	alive	5/10/2010	219	EPSG:31466	3510394.75	5416352.5	3507826	5417050	unfed	not_crossed	dispersal
HF-64555	m	12/21/2010 21:46	alive	5/10/2010	225	EPSG:31466	3510399.75	5416405.5	3507826	5417050	unfed	not_crossed	dispersal
HF-64555	m	12/28/2010 22:56	alive	5/10/2010	232	EPSG:31466	3510447	5416322.5	3507826	5417050	unfed	not_crossed	dispersal
HF-64558	m	6/10/2010 14:00	alive	5/14/2010	27	EPSG:31466	3517360	5414310	3517360	5414310	unfed	not_crossed	natal
HF-64558	m	7/3/2010 10:59	alive	5/14/2010	50	EPSG:31466	3517308.5	5414297	3517360	5414310	unfed	not_crossed	natal
HF-64558	m	7/7/2010 14:54	alive	5/14/2010	54	EPSG:31466	3517380.5	5414303	3517360	5414310	unfed	not_crossed	natal
HF-64558	m	7/12/2010 1:12	alive	5/14/2010	59	EPSG:31466	3517211.75	5414400.5	3517360	5414310	unfed	not_crossed	natal
HF-64558	m	7/14/2010 16:10	alive	5/14/2010	61	EPSG:31466	3517204.25	5414460	3517360	5414310	unfed	not_crossed	natal
HF-64558	m	7/15/2010 1:29	alive	5/14/2010	62	EPSG:31466	3517189.75	5414443.5	3517360	5414310	unfed	not_crossed	natal
HF-64558	m	7/19/2010 1:03	alive	5/14/2010	66	EPSG:31466	3517332.75	5414319.5	3517360	5414310	unfed	not_crossed	natal
HF-64558	m	7/21/2010 18:13	alive	5/14/2010	68	EPSG:31466	3517146.75	5414493.5	3517360	5414310	unfed	not_crossed	natal
HF-64558	m	7/22/2010 0:14	alive	5/14/2010	69	EPSG:31466	3517336	5414320	3517360	5414310	unfed	not_crossed	natal
HF-64558	m	7/26/2010 0:29	alive	5/14/2010	73	EPSG:31466	3517500.5	5414310	3517360	5414310	unfed	not_crossed	natal
HF-64558	m	7/28/2010 23:12	alive	5/14/2010	75	EPSG:31466	3517217.75	5414475	3517360	5414310	unfed	not_crossed	natal
HF-64558	m	7/29/2010 14:49	alive	5/14/2010	76	EPSG:31466	3517220.75	5414466	3517360	5414310	unfed	not_crossed	natal
HF-64558	m	8/2/2010 0:22	alive	5/14/2010	80	EPSG:31466	3517211.75	5414458	3517360	5414310	unfed	not_crossed	natal
HF-64558	m	8/4/2010 16:11	alive	5/14/2010	82	EPSG:31466	3517233	5414429	3517360	5414310	unfed	not_crossed	natal
HF-64558	m	8/5/2010 0:41	alive	5/14/2010	83	EPSG:31466	3517322	5414321	3517360	5414310	unfed	not_crossed	natal
HF-64558	m	8/10/2010 14:28	alive	5/14/2010	88	EPSG:31466	3517204.25	5414459.5	3517360	5414310	unfed	not_crossed	natal
HF-64558	m	8/11/2010 0:02	alive	5/14/2010	89	EPSG:31466	3517403.75	5414290.5	3517360	5414310	unfed	not_crossed	natal
HF-64558	m	8/17/2010 2:11	alive	5/14/2010	95	EPSG:31466	3517172.75	5414413	3517360	5414310	unfed	not_crossed	natal
HF-64558	m	8/19/2010 16:45	alive	5/14/2010	97	EPSG:31466	3517204.25	5414464.5	3517360	5414310	unfed	not_crossed	natal
HF-64558	m	8/24/2010 1:18	alive	5/14/2010	102	EPSG:31466	3517205.75	5414391	3517360	5414310	unfed	not_crossed	natal
HF-64558	m	8/29/2010 5:18	alive	5/14/2010	107	EPSG:31466	3517158	5414400.5	3517360	5414310	unfed	not_crossed	natal
HF-64558	m	8/31/2010 15:13	alive	5/14/2010	109	EPSG:31466	3517213	5414436.5	3517360	5414310	unfed	not_crossed	natal
HF-64558	m	9/1/2010 23:56	alive	5/14/2010	110	EPSG:31466	3517188.25	5414393.5	3517360	5414310	unfed	not_crossed	natal
HF-64558	m	9/2/2010 0:01	alive	5/14/2010	111	EPSG:31466	3517201.25	5414385	3517360	5414310	unfed	not_crossed	natal
HF-64558	m	9/4/2010 2:44	alive	5/14/2010	113	EPSG:31466	3517264.25	5414386.5	3517360	5414310	unfed	not_crossed	natal
HF-64558	m	9/5/2010 11:18	alive	5/14/2010	114	EPSG:31466	3517222.75	5414456.5	3517360	5414310	unfed	not_crossed	natal
HF-64558	m	9/6/2010 3:15	alive	5/14/2010	115	EPSG:31466	3517199.25	5414431.5	3517360	5414310	unfed	not_crossed	natal
HF-64558	m	9/9/2010 22:45	alive	5/14/2010	118	EPSG:31466	3517227.25	5414466	3517360	5414310	unfed	not_crossed	natal
HF-64558	m	9/10/2010 14:07	alive	5/14/2010	119	EPSG:31466	3517187	5414457.5	3517360	5414310	unfed	not_crossed	natal
HF-64558	m	9/11/2010 0:07	alive	5/14/2010	120	EPSG:31466	3517881.75	5416258.5	3517360	5414310	unfed	not_crossed	forays
HF-64558	m	9/13/2010 0:22	alive	5/14/2010	122	EPSG:31466	3517198.5	5414436	3517360	5414310	unfed	not_crossed	natal
HF-64558	m	9/15/2010 4:10	alive	5/14/2010	124	EPSG:31466	3518105.25	5415416	3517360	5414310	unfed	not_crossed	forays
HF-64558	m	9/16/2010 23:36	alive	5/14/2010	125	EPSG:31466	3517818	5414187	3517360	5414310	unfed	not_crossed	forays
HF-64558	m	9/18/2010 22:36	alive	5/14/2010	127	EPSG:31466	3517548.75	5416355	3517360	5414310	unfed	not_crossed	forays
HF-64558	m	9/19/2010 0:06	alive	5/14/2010	128	EPSG:31466	3517820.25	5416258.5	3517360	5414310	unfed	not_crossed	forays
HF-64558	m	9/21/2010 1:56	alive	5/14/2010	130	EPSG:31466	3517725.25	5416494.5	3517360	5414310	unfed	not_crossed	forays
HF-64558	m	9/22/2010 22:39	alive	5/14/2010	131	EPSG:31466	3517655.5	5416343	3517360	5414310	unfed	not_crossed	forays
HF-64558	m	9/24/2010 0:24	alive	5/14/2010	133	EPSG:31466	3517726.75	5416444.5	3517360	5414310	unfed	not_crossed	forays
HF-64558	m	9/25/2010 0:14	alive	5/14/2010	134	EPSG:31466	3517842	5416234.5	3517360	5414310	unfed	not_crossed	forays
HF-64558	m	9/26/2010 22:47	alive	5/14/2010	135	EPSG:31466	3517764	5416076.5	3517360	5414310	unfed	not_crossed	forays
HF-64558	m	9/28/2010 1:03	alive	5/14/2010	137	EPSG:31466	3517840.75	5416306	3517360	5414310	unfed	not_crossed	forays
HF-64558	m	9/29/2010 0:28	alive	5/14/2010	138	EPSG:31466	3517839	5416311	3517360	5414310	unfed	not_crossed	forays
HF-64558	m	10/1/2010 2:17	alive	5/14/2010	140	EPSG:31466	3517842.5	5416269.5	3517360	5414310	unfed	not_crossed	forays
HF-64558	m	10/2/2010 23:10	alive	5/14/2010	141	EPSG:31466	3517815	5416254	3517360	5414310	unfed	not_crossed	forays
HF-64558	m	10/3/2010 11:43	alive	5/14/2010	142	EPSG:31466	3517816.25	5416299	3517360	5414310	unfed	not_crossed	forays
HF-64558	m	10/6/2010 1:14	alive	5/14/2010	145	EPSG:31466	3517814.75	5416254	3517360	5414310	unfed	not_crossed	forays
HF-64558	m	10/9/2010 0:01	alive	5/14/2010	148	EPSG:31466	3517178	5414434	3517360	5414310	unfed	not_crossed	natal
HF-64558	m	10/11/2010 23:37	alive	5/14/2010	150	EPSG:31466	3517681.75	5416295	3517360	5414310	unfed	not_crossed	dispersal
HF-64558	m	10/16/2010 21:15	alive	5/14/2010	155	EPSG:31466	3517378	5416354	3517360	5414310	unfed	not_crossed	dispersal
HF-64558	m	10/18/2010 17:08	alive	5/14/2010	157	EPSG:31466	3517378.5	5416357	3517360	5414310	unfed	not_crossed	dispersal
HF-64558	m	10/19/2010 22:49	alive	5/14/2010	158	EPSG:31466	3517380	5416357.5	3517360	5414310	unfed	not_crossed	dispersal
HF-64558	m	10/24/2010 3:46	alive	5/14/2010	163	EPSG:31466	3517764.25	5416548.5	3517360	5414310	unfed	not_crossed	dispersal
HF-64558	m	10/27/2010 1:54	alive	5/14/2010	166	EPSG:31466	3517690.25	5416480.5	3517360	5414310	unfed	not_crossed	dispersal
HF-64558	m	10/30/2010 18:26	alive	5/14/2010	169	EPSG:31466	3517376	5416359	3517360	5414310	unfed	not_crossed	dispersal
HF-64558	m	11/4/2010 19:15	alive	5/14/2010	174	EPSG:31466	3517644	5416503	3517360	5414310	unfed	not_crossed	dispersal
HF-64559	f	6/10/2010 14:00	alive	5/13/2010	28	EPSG:31466	3517360	5414310	3517360	5414310	unfed	not_crossed	natal
HF-64559	f	7/3/2010 10:58	alive	5/13/2010	51	EPSG:31466	3517375.5	5414299	3517360	5414310	unfed	not_crossed	natal
HF-64559	f	7/7/2010 14:58	alive	5/13/2010	55	EPSG:31466	3517334.75	5414311.5	3517360	5414310	unfed	not_crossed	natal
HF-64559	f	7/12/2010 0:48	alive	5/13/2010	60	EPSG:31466	3517216.25	5414410.5	3517360	5414310	unfed	not_crossed	natal
HF-64559	f	7/14/2010 16:06	alive	5/13/2010	62	EPSG:31466	3517203.5	5414460.5	3517360	5414310	unfed	not_crossed	natal
HF-64559	f	7/15/2010 1:43	alive	5/13/2010	63	EPSG:31466	3517317.25	5414353	3517360	5414310	unfed	not_crossed	natal
HF-64559	f	7/19/2010 1:19	alive	5/13/2010	67	EPSG:31466	3517335	5414316.5	3517360	5414310	unfed	not_crossed	natal
HF-64559	f	7/21/2010 18:06	alive	5/13/2010	69	EPSG:31466	3517208.75	5414465.5	3517360	5414310	unfed	not_crossed	natal
HF-64559	f	7/22/2010 0:06	alive	5/13/2010	70	EPSG:31466	3517210.25	5414465	3517360	5414310	unfed	not_crossed	natal
HF-64559	f	7/26/2010 0:18	alive	5/13/2010	74	EPSG:31466	3517384.25	5414392	3517360	5414310	unfed	not_crossed	natal
HF-64559	f	7/28/2010 23:09	alive	5/13/2010	76	EPSG:31466	3517230.25	5414457	3517360	5414310	unfed	not_crossed	natal
HF-64559	f	7/29/2010 14:42	alive	5/13/2010	77	EPSG:31466	3517212.5	5414471	3517360	5414310	unfed	not_crossed	natal
HF-64559	f	8/2/2010 0:08	alive	5/13/2010	81	EPSG:31466	3517487	5414328	3517360	5414310	unfed	not_crossed	natal
HF-64559	f	8/4/2010 16:09	alive	5/13/2010	83	EPSG:31466	3517237.5	5414452	3517360	5414310	unfed	not_crossed	natal
HF-64559	f	8/5/2010 0:47	alive	5/13/2010	84	EPSG:31466	3517408.5	5414358.5	3517360	5414310	unfed	not_crossed	natal
HF-64559	f	8/10/2010 14:33	alive	5/13/2010	89	EPSG:31466	3517242	5414472.5	3517360	5414310	unfed	not_crossed	natal
HF-64559	f	8/17/2010 2:05	alive	5/13/2010	96	EPSG:31466	3517159	5414486.5	3517360	5414310	unfed	not_crossed	natal
HF-64559	f	8/19/2010 16:42	alive	5/13/2010	98	EPSG:31466	3517222.75	5414453.5	3517360	5414310	unfed	not_crossed	natal
HF-64559	f	8/24/2010 1:50	alive	5/13/2010	103	EPSG:31466	3517612.25	5415038	3517360	5414310	unfed	not_crossed	forays
HF-64559	f	8/29/2010 5:28	alive	5/13/2010	108	EPSG:31466	3516797.75	5414461	3517360	5414310	unfed	not_crossed	forays
HF-64559	f	8/31/2010 15:13	alive	5/13/2010	110	EPSG:31466	3517225	5414446	3517360	5414310	unfed	not_crossed	natal
HF-64559	f	9/1/2010 0:10	alive	5/13/2010	111	EPSG:31466	3517183.25	5414463.5	3517360	5414310	unfed	not_crossed	natal
HF-64559	f	9/4/2010 3:11	alive	5/13/2010	114	EPSG:31466	3517402.5	5415610	3517360	5414310	unfed	not_crossed	forays
HF-64559	f	9/5/2010 11:06	alive	5/13/2010	115	EPSG:31466	3517215.75	5414421	3517360	5414310	unfed	not_crossed	natal
HF-64559	f	9/6/2010 3:13	alive	5/13/2010	116	EPSG:31466	3517166.5	5414426.5	3517360	5414310	unfed	not_crossed	natal
HF-64559	f	9/9/2010 23:30	alive	5/13/2010	119	EPSG:31466	3515030.5	5415124	3517360	5414310	unfed	not_crossed	forays
HF-64559	f	9/10/2010 0:01	alive	5/13/2010	120	EPSG:31466	3517522.5	5414857.5	3517360	5414310	unfed	not_crossed	forays
HF-64559	f	9/11/2010 1:37	alive	5/13/2010	121	EPSG:31466	3517436.25	5415670	3517360	5414310	unfed	not_crossed	forays
HF-64559	f	9/13/2010 0:11	alive	5/13/2010	123	EPSG:31466	3517179	5414455.5	3517360	5414310	unfed	not_crossed	natal
HF-64559	f	9/15/2010 2:18	alive	5/13/2010	125	EPSG:31466	3518093.25	5413392	3517360	5414310	unfed	not_crossed	forays
HF-64559	f	9/16/2010 22:28	alive	5/13/2010	126	EPSG:31466	3517368.75	5413454.5	3517360	5414310	unfed	not_crossed	forays
HF-64559	f	9/18/2010 1:00	alive	5/13/2010	128	EPSG:31466	3517848	5417208.5	3517360	5414310	unfed	not_crossed	forays
HF-64559	f	9/19/2010 0:49	alive	5/13/2010	129	EPSG:31466	3516705.75	5414673.5	3517360	5414310	unfed	not_crossed	forays
HF-64559	f	9/21/2010 3:06	alive	5/13/2010	131	EPSG:31466	3517730.75	5417287	3517360	5414310	unfed	not_crossed	forays
HF-64559	f	9/22/2010 23:04	alive	5/13/2010	132	EPSG:31466	3518085.25	5415383	3517360	5414310	unfed	not_crossed	forays
HF-64559	f	9/24/2010 22:39	alive	5/13/2010	134	EPSG:31466	3517194.5	5414453.5	3517360	5414310	unfed	not_crossed	natal
HF-64559	f	9/25/2010 11:50	alive	5/13/2010	135	EPSG:31466	3517164	5414398	3517360	5414310	unfed	not_crossed	natal
HF-64559	f	9/26/2010 22:18	alive	5/13/2010	136	EPSG:31466	3518419.75	5415096	3517360	5414310	unfed	not_crossed	forays
HF-64559	f	9/27/2010 23:57	alive	5/13/2010	137	EPSG:31466	3516352	5414085.5	3517360	5414310	unfed	not_crossed	forays
HF-64559	f	9/28/2010 0:02	alive	5/13/2010	138	EPSG:31466	3516380.5	5414038.5	3517360	5414310	unfed	not_crossed	forays
HF-64559	f	10/1/2010 2:45	alive	5/13/2010	141	EPSG:31466	3516828.5	5414514.5	3517360	5414310	unfed	not_crossed	forays
HF-64559	f	10/2/2010 22:43	alive	5/13/2010	142	EPSG:31466	3516779	5413535.5	3517360	5414310	unfed	not_crossed	forays
HF-64559	f	10/3/2010 11:20	alive	5/13/2010	143	EPSG:31466	3517227	5414471	3517360	5414310	unfed	not_crossed	natal
HF-64559	f	10/6/2010 2:07	alive	5/13/2010	146	EPSG:31466	3516177.25	5414049	3517360	5414310	unfed	not_crossed	forays
HF-64559	f	10/8/2010 22:59	alive	5/13/2010	148	EPSG:31466	3516636.5	5413907.5	3517360	5414310	unfed	not_crossed	forays
HF-64559	f	10/11/2010 23:57	alive	5/13/2010	151	EPSG:31466	3517334.5	5414865	3517360	5414310	unfed	not_crossed	forays
HF-64559	f	10/12/2010 0:02	alive	5/13/2010	152	EPSG:31466	3517251.75	5414839.5	3517360	5414310	unfed	not_crossed	forays
HF-64559	f	10/16/2010 21:50	alive	5/13/2010	156	EPSG:31466	3517104	5415725	3517360	5414310	unfed	not_crossed	forays
HF-64559	f	10/18/2010 15:55	alive	5/13/2010	158	EPSG:31466	3517232	5414470.5	3517360	5414310	unfed	not_crossed	natal
HF-64559	f	10/19/2010 22:17	alive	5/13/2010	159	EPSG:31466	3517171.25	5414455	3517360	5414310	unfed	not_crossed	natal
HF-64559	f	10/24/2010 1:26	alive	5/13/2010	164	EPSG:31466	3516618	5414583	3517360	5414310	unfed	not_crossed	forays
HF-64559	f	10/27/2010 2:41	alive	5/13/2010	167	EPSG:31466	3516987.5	5414485.5	3517360	5414310	unfed	not_crossed	forays
HF-64559	f	11/4/2010 21:47	alive	5/13/2010	175	EPSG:31466	3516623	5414403	3517360	5414310	unfed	not_crossed	forays
HF-64559	f	11/6/2010 15:46	alive	5/13/2010	177	EPSG:31466	3516520	5414807	3517360	5414310	unfed	not_crossed	forays
HF-64559	f	11/10/2010 0:47	alive	5/13/2010	181	EPSG:31466	3516524.5	5414342	3517360	5414310	unfed	not_crossed	forays
HF-64559	f	11/19/2010 2:40	alive	5/13/2010	190	EPSG:31466	3517638.5	5415069.5	3517360	5414310	unfed	not_crossed	forays
HF-64559	f	11/25/2010 4:57	alive	5/13/2010	196	EPSG:31466	3516921.75	5414825.5	3517360	5414310	unfed	not_crossed	forays
HF-64559	f	11/28/2010 11:08	alive	5/13/2010	199	EPSG:31466	3517167	5414411	3517360	5414310	unfed	not_crossed	natal
HF-64559	f	12/13/2010 1:20	alive	5/13/2010	214	EPSG:31466	3516925	5414937	3517360	5414310	unfed	not_crossed	forays
HF-64559	f	12/15/2010 14:08	alive	5/13/2010	216	EPSG:31466	3517219.75	5414443	3517360	5414310	unfed	not_crossed	natal
HF-64559	f	12/19/2010 18:38	alive	5/13/2010	220	EPSG:31466	3516990.75	5414860.5	3517360	5414310	unfed	not_crossed	dispersal
HF-64559	f	12/30/2010 2:58	alive	5/13/2010	231	EPSG:31466	3516880.25	5415365.5	3517360	5414310	unfed	not_crossed	dispersal
HF-64630	m	6/10/2010 12:30	alive	5/14/2010	27	EPSG:31466	3516948	5413575.5	3516948	5413576	fed	not_crossed	natal
HF-64630	m	7/3/2010 10:39	alive	5/14/2010	50	EPSG:31466	3516882.75	5413446.5	3516948	5413576	fed	not_crossed	natal
HF-64630	m	7/7/2010 14:17	alive	5/14/2010	54	EPSG:31466	3516933.25	5413577.5	3516948	5413576	fed	not_crossed	natal
HF-64630	m	7/12/2010 0:10	alive	5/14/2010	59	EPSG:31466	3517001.25	5413521.5	3516948	5413576	fed	not_crossed	natal
HF-64630	m	7/14/2010 15:50	alive	5/14/2010	61	EPSG:31466	3516938	5413499	3516948	5413576	fed	not_crossed	natal
HF-64630	m	7/15/2010 2:24	alive	5/14/2010	62	EPSG:31466	3516963.5	5413552	3516948	5413576	fed	not_crossed	natal
HF-64630	m	7/19/2010 0:19	alive	5/14/2010	66	EPSG:31466	3516976.5	5413553	3516948	5413576	fed	not_crossed	natal
HF-64630	m	7/21/2010 18:46	alive	5/14/2010	68	EPSG:31466	3516943	5413541.5	3516948	5413576	fed	not_crossed	natal
HF-64630	m	7/22/2010 0:52	alive	5/14/2010	69	EPSG:31466	3516946	5413576.5	3516948	5413576	fed	not_crossed	natal
HF-64630	m	7/26/2010 1:14	alive	5/14/2010	73	EPSG:31466	3516956.75	5413516.5	3516948	5413576	fed	not_crossed	natal
HF-64630	m	7/28/2010 22:21	alive	5/14/2010	75	EPSG:31466	3516951.5	5413591.5	3516948	5413576	fed	not_crossed	natal
HF-64630	m	7/29/2010 14:14	alive	5/14/2010	76	EPSG:31466	3516959	5413535	3516948	5413576	fed	not_crossed	natal
HF-64630	m	8/2/2010 0:52	alive	5/14/2010	80	EPSG:31466	3517003.75	5413550	3516948	5413576	fed	not_crossed	natal
HF-64630	m	8/4/2010 15:30	alive	5/14/2010	82	EPSG:31466	3516957	5413531.5	3516948	5413576	fed	not_crossed	natal
HF-64630	m	8/5/2010 1:18	alive	5/14/2010	83	EPSG:31466	3516945.75	5413517	3516948	5413576	fed	not_crossed	natal
HF-64630	m	8/10/2010 23:21	alive	5/14/2010	88	EPSG:31466	3516996.5	5413538	3516948	5413576	fed	not_crossed	natal
HF-64630	m	8/17/2010 1:44	alive	5/14/2010	95	EPSG:31466	3517014.25	5413573	3516948	5413576	fed	not_crossed	natal
HF-64630	m	8/19/2010 4:24	alive	5/14/2010	97	EPSG:31466	3517003.75	5413572.5	3516948	5413576	fed	not_crossed	natal
HF-64630	m	8/24/2010 17:26	alive	5/14/2010	102	EPSG:31466	3516920.75	5413552.5	3516948	5413576	fed	not_crossed	natal
HF-64630	m	8/29/2010 5:51	alive	5/14/2010	107	EPSG:31466	3516949.25	5413542	3516948	5413576	fed	not_crossed	natal
HF-64630	m	8/31/2010 14:57	alive	5/14/2010	109	EPSG:31466	3516920.25	5413527.5	3516948	5413576	fed	not_crossed	natal
HF-64630	m	9/1/2010 23:34	alive	5/14/2010	110	EPSG:31466	3516959.25	5413589.5	3516948	5413576	fed	not_crossed	natal
HF-64630	m	9/4/2010 2:13	alive	5/14/2010	113	EPSG:31466	3517185.25	5413773.5	3516948	5413576	fed	not_crossed	forays
HF-64630	m	9/5/2010 12:03	alive	5/14/2010	114	EPSG:31466	3516933.25	5413540	3516948	5413576	fed	not_crossed	natal
HF-64630	m	9/6/2010 2:12	alive	5/14/2010	115	EPSG:31466	3517333.25	5414048.5	3516948	5413576	fed	not_crossed	forays
HF-64630	m	9/7/2010 1:57	alive	5/14/2010	116	EPSG:31466	3517214.5	5413970	3516948	5413576	fed	not_crossed	forays
HF-64630	m	9/9/2010 22:30	alive	5/14/2010	118	EPSG:31466	3517317.5	5414091.5	3516948	5413576	fed	not_crossed	forays
HF-64630	m	9/10/2010 22:59	alive	5/14/2010	119	EPSG:31466	3517192.25	5413921.5	3516948	5413576	fed	not_crossed	forays
HF-64630	m	9/13/2010 1:04	alive	5/14/2010	122	EPSG:31466	3517472	5414042	3516948	5413576	fed	not_crossed	forays
HF-64630	m	9/15/2010 1:35	alive	5/14/2010	124	EPSG:31466	3517124.75	5414259.5	3516948	5413576	fed	not_crossed	forays
HF-64630	m	9/16/2010 21:44	alive	5/14/2010	125	EPSG:31466	3517119	5414315.5	3516948	5413576	fed	not_crossed	forays
HF-64630	m	9/17/2010 23:37	alive	5/14/2010	126	EPSG:31466	3517375	5414157.5	3516948	5413576	fed	not_crossed	forays
HF-64630	m	9/18/2010 12:54	alive	5/14/2010	127	EPSG:31466	3516917.25	5413542	3516948	5413576	fed	not_crossed	natal
HF-64630	m	9/19/2010 1:52	alive	5/14/2010	128	EPSG:31466	3517308.25	5414159	3516948	5413576	fed	not_crossed	forays
HF-64630	m	9/20/2010 23:46	alive	5/14/2010	129	EPSG:31466	3517762.5	5415164	3516948	5413576	fed	not_crossed	forays
HF-64630	m	9/21/2010 0:11	alive	5/14/2010	130	EPSG:31466	3518138.5	5415502.5	3516948	5413576	fed	not_crossed	forays
HF-64630	m	9/22/2010 21:41	alive	5/14/2010	131	EPSG:31466	3517294	5414077.5	3516948	5413576	fed	not_crossed	forays
HF-64630	m	9/25/2010 13:40	alive	5/14/2010	134	EPSG:31466	3516922.25	5413530.5	3516948	5413576	fed	not_crossed	natal
HF-64630	m	9/26/2010 21:20	alive	5/14/2010	135	EPSG:31466	3517364	5414131	3516948	5413576	fed	not_crossed	forays
HF-64630	m	9/27/2010 23:17	alive	5/14/2010	136	EPSG:31466	3517359.25	5414106	3516948	5413576	fed	not_crossed	forays
HF-64630	m	9/28/2010 23:39	alive	5/14/2010	137	EPSG:31466	3517255.75	5414254	3516948	5413576	fed	not_crossed	forays
HF-64630	m	10/1/2010 3:00	alive	5/14/2010	140	EPSG:31466	3517524	5414096.5	3516948	5413576	fed	not_crossed	forays
HF-64630	m	10/2/2010 22:04	alive	5/14/2010	141	EPSG:31466	3517328	5414109.5	3516948	5413576	fed	not_crossed	forays
HF-64630	m	10/3/2010 11:10	alive	5/14/2010	142	EPSG:31466	3516921.5	5413535.5	3516948	5413576	fed	not_crossed	natal
HF-64630	m	10/6/2010 2:34	alive	5/14/2010	145	EPSG:31466	3517431	5414051	3516948	5413576	fed	not_crossed	forays
HF-64630	m	10/8/2010 23:37	alive	5/14/2010	147	EPSG:31466	3517381	5414114	3516948	5413576	fed	not_crossed	forays
HF-64630	m	10/12/2010 0:25	alive	5/14/2010	151	EPSG:31466	3517477.5	5414112	3516948	5413576	fed	not_crossed	forays
HF-64630	m	10/16/2010 22:23	alive	5/14/2010	155	EPSG:31466	3517518.25	5414099.5	3516948	5413576	fed	not_crossed	forays
HF-64630	m	10/18/2010 15:41	alive	5/14/2010	157	EPSG:31466	3517588	5414063	3516948	5413576	fed	not_crossed	forays
HF-64630	m	10/19/2010 21:53	alive	5/14/2010	158	EPSG:31466	3517544.75	5414141	3516948	5413576	fed	not_crossed	forays
HF-64630	m	10/24/2010 1:48	alive	5/14/2010	163	EPSG:31466	3517528.5	5414095.5	3516948	5413576	fed	not_crossed	forays
HF-64630	m	10/27/2010 2:57	alive	5/14/2010	166	EPSG:31466	3517540.5	5414095	3516948	5413576	fed	not_crossed	forays
HF-64630	m	11/4/2010 21:06	alive	5/14/2010	174	EPSG:31466	3517478.5	5414062.5	3516948	5413576	fed	not_crossed	forays
HF-64630	m	11/6/2010 15:20	alive	5/14/2010	176	EPSG:31466	3517589.5	5414063.5	3516948	5413576	fed	not_crossed	forays
HF-64630	m	11/10/2010 0:20	alive	5/14/2010	180	EPSG:31466	3517580	5414136.5	3516948	5413576	fed	not_crossed	forays
HF-64630	m	11/19/2010 16:30	alive	5/14/2010	189	EPSG:31466	3517582.25	5414063	3516948	5413576	fed	not_crossed	forays
HF-64630	m	11/25/2010 5:12	alive	5/14/2010	195	EPSG:31466	3517490	5414045	3516948	5413576	fed	not_crossed	forays
HF-64630	m	11/28/2010 10:47	alive	5/14/2010	198	EPSG:31466	3517579	5414075.5	3516948	5413576	fed	not_crossed	forays
HF-64630	m	12/13/2010 1:38	alive	5/14/2010	213	EPSG:31466	3517615.75	5414042	3516948	5413576	fed	not_crossed	forays
HF-64630	m	12/15/2010 14:19	alive	5/14/2010	215	EPSG:31466	3517609.5	5414062.5	3516948	5413576	fed	not_crossed	forays
HF-64630	m	12/19/2010 18:05	alive	5/14/2010	219	EPSG:31466	3517469	5414046	3516948	5413576	fed	not_crossed	forays
HF-64630	m	12/30/2010 2:20	alive	5/14/2010	230	EPSG:31466	3517558.5	5414380	3516948	5413576	fed	not_crossed	forays
HF-64630	m	1/16/2011 18:32	alive	5/14/2010	247	EPSG:31466	3517150.25	5413729.5	3516948	5413576	fed	not_crossed	natal
HF-64630	m	1/23/2011 4:04	alive	5/14/2010	254	EPSG:31466	3517521.25	5414042.5	3516948	5413576	fed	not_crossed	dispersal
HF-64630	m	2/1/2011 23:11	alive	5/14/2010	263	EPSG:31466	3517452.75	5414135.5	3516948	5413576	fed	not_crossed	dispersal
HF-64630	m	2/2/2011 15:13	alive	5/14/2010	264	EPSG:31466	3517585.5	5414083	3516948	5413576	fed	not_crossed	dispersal
HF-64630	m	2/9/2011 16:42	alive	5/14/2010	271	EPSG:31466	3517494.75	5414039	3516948	5413576	fed	not_crossed	dispersal
HF-64630	m	2/11/2011 22:36	alive	5/14/2010	273	EPSG:31466	3517496	5414069.5	3516948	5413576	fed	not_crossed	dispersal
HF-64630	m	2/14/2011 13:05	alive	5/14/2010	276	EPSG:31466	3517579.75	5414060.5	3516948	5413576	fed	not_crossed	dispersal
HF-64630	m	2/16/2011 22:28	alive	5/14/2010	278	EPSG:31466	3517472.5	5414062	3516948	5413576	fed	not_crossed	dispersal
HF-64630	m	3/1/2011 21:03	alive	5/14/2010	291	EPSG:31466	3517628	5414161	3516948	5413576	fed	not_crossed	dispersal
HF-64630	m	3/9/2011 14:45	alive	5/14/2010	299	EPSG:31466	3517628	5414048	3516948	5413576	fed	not_crossed	dispersal
HF-64630	m	3/16/2011 21:58	alive	5/14/2010	306	EPSG:31466	3517505.75	5414028.5	3516948	5413576	fed	not_crossed	dispersal
HF-64630	m	3/27/2011 18:30	alive	5/14/2010	317	EPSG:31466	3517490.25	5414036.5	3516948	5413576	fed	not_crossed	dispersal
HF-64630	m	3/29/2011 22:38	alive	5/14/2010	319	EPSG:31466	3517474.5	5414042	3516948	5413576	fed	not_crossed	dispersal
HF-64632	f	6/10/2010 12:40	alive	5/14/2010	27	EPSG:31466	3516948	5413575.5	3516948	5413576	fed	crossed	natal
HF-64632	f	7/7/2010 14:33	alive	5/14/2010	54	EPSG:31466	3516947	5413573	3516948	5413576	fed	crossed	natal
HF-64632	f	7/12/2010 0:35	alive	5/14/2010	59	EPSG:31466	3516912.25	5413501	3516948	5413576	fed	crossed	natal
HF-64632	f	7/14/2010 15:48	alive	5/14/2010	61	EPSG:31466	3516944.5	5413532.5	3516948	5413576	fed	crossed	natal
HF-64632	f	7/15/2010 2:35	alive	5/14/2010	62	EPSG:31466	3516948.5	5413573	3516948	5413576	fed	crossed	natal
HF-64632	f	7/19/2010 0:28	alive	5/14/2010	66	EPSG:31466	3516939	5413485	3516948	5413576	fed	crossed	natal
HF-64632	f	7/21/2010 18:58	alive	5/14/2010	68	EPSG:31466	3516955	5413546.5	3516948	5413576	fed	crossed	natal
HF-64632	f	7/22/2010 1:03	alive	5/14/2010	69	EPSG:31466	3516950	5413580	3516948	5413576	fed	crossed	natal
HF-64632	f	7/26/2010 1:19	alive	5/14/2010	73	EPSG:31466	3516911.75	5413445.5	3516948	5413576	fed	crossed	natal
HF-64632	f	7/28/2010 22:14	alive	5/14/2010	75	EPSG:31466	3516904.75	5413581.5	3516948	5413576	fed	crossed	natal
HF-64632	f	7/29/2010 14:22	alive	5/14/2010	76	EPSG:31466	3516957	5413536	3516948	5413576	fed	crossed	natal
HF-64632	f	8/2/2010 0:56	alive	5/14/2010	80	EPSG:31466	3516915.25	5413610.5	3516948	5413576	fed	crossed	natal
HF-64632	f	8/4/2010 15:30	alive	5/14/2010	82	EPSG:31466	3516957.75	5413526	3516948	5413576	fed	crossed	natal
HF-64632	f	8/5/2010 1:15	alive	5/14/2010	83	EPSG:31466	3516963.75	5413528.5	3516948	5413576	fed	crossed	natal
HF-64632	f	8/10/2010 15:03	alive	5/14/2010	88	EPSG:31466	3516921.5	5413543.5	3516948	5413576	fed	crossed	natal
HF-64632	f	8/17/2010 1:46	alive	5/14/2010	95	EPSG:31466	3516994.75	5413550.5	3516948	5413576	fed	crossed	natal
HF-64632	f	8/19/2010 4:29	alive	5/14/2010	97	EPSG:31466	3517005	5413564	3516948	5413576	fed	crossed	natal
HF-64632	f	8/24/2010 1:07	alive	5/14/2010	102	EPSG:31466	3517002.75	5413573.5	3516948	5413576	fed	crossed	natal
HF-64632	f	8/29/2010 5:56	alive	5/14/2010	107	EPSG:31466	3516962	5413543.5	3516948	5413576	fed	crossed	natal
HF-64632	f	8/31/2010 14:29	alive	5/14/2010	109	EPSG:31466	3516954.25	5413595.5	3516948	5413576	fed	crossed	natal
HF-64632	f	9/1/2010 23:36	alive	5/14/2010	110	EPSG:31466	3516926.25	5413588.5	3516948	5413576	fed	crossed	natal
HF-64632	f	9/4/2010 2:22	alive	5/14/2010	113	EPSG:31466	3517055.5	5413796	3516948	5413576	fed	crossed	natal
HF-64632	f	9/5/2010 11:46	alive	5/14/2010	114	EPSG:31466	3516957.5	5413566.5	3516948	5413576	fed	crossed	natal
HF-64632	f	9/6/2010 1:43	alive	5/14/2010	115	EPSG:31466	3516993	5413544.5	3516948	5413576	fed	crossed	natal
HF-64632	f	9/9/2010 22:15	alive	5/14/2010	118	EPSG:31466	3517210.75	5413656	3516948	5413576	fed	crossed	natal
HF-64632	f	9/10/2010 13:07	alive	5/14/2010	119	EPSG:31466	3516923	5413537	3516948	5413576	fed	crossed	natal
HF-64632	f	9/13/2010 0:41	alive	5/14/2010	122	EPSG:31466	3516949	5413587.5	3516948	5413576	fed	crossed	natal
HF-64632	f	9/15/2010 2:57	alive	5/14/2010	124	EPSG:31466	3517396.75	5413671.5	3516948	5413576	fed	crossed	forays
HF-64632	f	9/16/2010 22:06	alive	5/14/2010	125	EPSG:31466	3516980.25	5413865	3516948	5413576	fed	crossed	natal
HF-64632	f	9/17/2010 23:02	alive	5/14/2010	126	EPSG:31466	3516955	5413736	3516948	5413576	fed	crossed	natal
HF-64632	f	9/18/2010 12:45	alive	5/14/2010	127	EPSG:31466	3516947.75	5413576.5	3516948	5413576	fed	crossed	natal
HF-64632	f	9/19/2010 1:37	alive	5/14/2010	128	EPSG:31466	3516963.5	5413594	3516948	5413576	fed	crossed	natal
HF-64632	f	9/20/2010 22:48	alive	5/14/2010	129	EPSG:31466	3516575.25	5413128	3516948	5413576	fed	crossed	forays
HF-64632	f	9/21/2010 22:36	alive	5/14/2010	130	EPSG:31466	3517092.75	5412646	3516948	5413576	fed	crossed	forays
HF-64632	f	9/22/2010 21:51	alive	5/14/2010	131	EPSG:31466	3517292.5	5413878.5	3516948	5413576	fed	crossed	forays
HF-64632	f	9/23/2010 22:12	alive	5/14/2010	132	EPSG:31466	3513978.75	5412153.5	3516948	5413576	fed	crossed	forays
HF-64632	f	9/24/2010 0:02	alive	5/14/2010	133	EPSG:31466	3516979	5413564	3516948	5413576	fed	crossed	natal
HF-64632	f	9/25/2010 13:30	alive	5/14/2010	134	EPSG:31466	3516948.75	5413598	3516948	5413576	fed	crossed	natal
HF-64632	f	9/26/2010 21:43	alive	5/14/2010	135	EPSG:31466	3516896	5413596	3516948	5413576	fed	crossed	natal
HF-64632	f	9/27/2010 22:58	alive	5/14/2010	136	EPSG:31466	3517546.5	5413657.5	3516948	5413576	fed	crossed	forays
HF-64632	f	9/28/2010 23:58	alive	5/14/2010	137	EPSG:31466	3516903.25	5413609.5	3516948	5413576	fed	crossed	natal
HF-64632	f	9/29/2010 0:03	alive	5/14/2010	138	EPSG:31466	3516892	5413575.5	3516948	5413576	fed	crossed	natal
HF-64632	f	10/1/2010 3:18	alive	5/14/2010	140	EPSG:31466	3516968.75	5413570.5	3516948	5413576	fed	crossed	natal
HF-64632	f	10/2/2010 22:21	alive	5/14/2010	141	EPSG:31466	3517256.25	5413696	3516948	5413576	fed	crossed	forays
HF-64632	f	10/3/2010 11:02	alive	5/14/2010	142	EPSG:31466	3516955.75	5413600.5	3516948	5413576	fed	crossed	natal
HF-64632	f	10/6/2010 2:55	alive	5/14/2010	145	EPSG:31466	3516916.5	5413585.5	3516948	5413576	fed	crossed	natal
HF-64632	f	10/8/2010 23:20	alive	5/14/2010	147	EPSG:31466	3516948.75	5413570	3516948	5413576	fed	crossed	natal
HF-64632	f	10/12/2010 0:56	alive	5/14/2010	151	EPSG:31466	3517022	5413883	3516948	5413576	fed	crossed	forays
HF-64632	f	10/16/2010 22:51	alive	5/14/2010	155	EPSG:31466	3516914.75	5413432	3516948	5413576	fed	crossed	natal
HF-64632	f	10/18/2010 12:08	alive	5/14/2010	157	EPSG:31466	3516949.25	5413602	3516948	5413576	fed	crossed	natal
HF-64632	f	10/19/2010 21:26	alive	5/14/2010	158	EPSG:31466	3516906.5	5413614	3516948	5413576	fed	crossed	natal
HF-64632	f	10/24/2010 2:01	alive	5/14/2010	163	EPSG:31466	3516949.25	5413583.5	3516948	5413576	fed	crossed	natal
HF-64632	f	10/27/2010 3:16	alive	5/14/2010	166	EPSG:31466	3516949.5	5413526.5	3516948	5413576	fed	crossed	natal
HF-64632	f	11/4/2010 21:31	alive	5/14/2010	174	EPSG:31466	3516443.75	5413999.5	3516948	5413576	fed	crossed	forays
HF-64632	f	11/6/2010 15:06	alive	5/14/2010	176	EPSG:31466	3516954	5413595.5	3516948	5413576	fed	crossed	natal
HF-64632	f	11/9/2010 23:57	alive	5/14/2010	179	EPSG:31466	3516934	5413818	3516948	5413576	fed	crossed	natal
HF-64632	f	11/10/2010 0:02	alive	5/14/2010	180	EPSG:31466	3516913.5	5413605	3516948	5413576	fed	crossed	natal
HF-64632	f	11/20/2010 17:08	alive	5/14/2010	190	EPSG:31466	3518699	5417330.5	3516948	5413576	fed	crossed	dispersal
HF-64632	f	11/21/2010 12:04	alive	5/14/2010	191	EPSG:31466	3518711.75	5417297	3516948	5413576	fed	crossed	dispersal
HF-64632	f	11/25/2010 1:23	alive	5/14/2010	195	EPSG:31466	3518327.25	5417285	3516948	5413576	fed	crossed	dispersal
HF-64644	f	6/16/2010 13:15	alive	5/19/2010	28	EPSG:31466	3514248.75	5431906.5	3514249	5431906	fed	crossed	natal
HF-64644	f	7/2/2010 11:55	alive	5/19/2010	44	EPSG:31466	3514243.75	5431901	3514249	5431906	fed	crossed	natal
HF-64644	f	7/4/2010 19:00	alive	5/19/2010	46	EPSG:31466	3514243.25	5431911	3514249	5431906	fed	crossed	natal
HF-64644	f	7/5/2010 1:00	alive	5/19/2010	47	EPSG:31466	3514242.75	5431911.5	3514249	5431906	fed	crossed	natal
HF-64644	f	7/6/2010 14:16	alive	5/19/2010	48	EPSG:31466	3514248	5431902	3514249	5431906	fed	crossed	natal
HF-64644	f	7/10/2010 23:32	alive	5/19/2010	52	EPSG:31466	3514249.5	5431904	3514249	5431906	fed	crossed	natal
HF-64644	f	7/14/2010 0:06	alive	5/19/2010	56	EPSG:31466	3514251.5	5431904.5	3514249	5431906	fed	crossed	natal
HF-64644	f	7/17/2010 22:27	alive	5/19/2010	59	EPSG:31466	3514117.5	5431925	3514249	5431906	fed	crossed	natal
HF-64644	f	7/20/2010 18:41	alive	5/19/2010	62	EPSG:31466	3514252	5431901	3514249	5431906	fed	crossed	natal
HF-64644	f	7/21/2010 1:22	alive	5/19/2010	63	EPSG:31466	3514251.75	5431903.5	3514249	5431906	fed	crossed	natal
HF-64644	f	7/25/2010 0:06	alive	5/19/2010	67	EPSG:31466	3514355.75	5431869.5	3514249	5431906	fed	crossed	natal
HF-64644	f	7/26/2010 15:49	alive	5/19/2010	68	EPSG:31466	3514252	5431902.5	3514249	5431906	fed	crossed	natal
HF-64644	f	7/28/2010 4:24	alive	5/19/2010	70	EPSG:31466	3514423.25	5431989.5	3514249	5431906	fed	crossed	natal
HF-64644	f	8/1/2010 0:11	alive	5/19/2010	74	EPSG:31466	3514532.75	5431856.5	3514249	5431906	fed	crossed	natal
HF-64644	f	8/3/2010 17:10	alive	5/19/2010	76	EPSG:31466	3514251	5431902.5	3514249	5431906	fed	crossed	natal
HF-64644	f	8/4/2010 1:21	alive	5/19/2010	77	EPSG:31466	3514250.75	5431904	3514249	5431906	fed	crossed	natal
HF-64644	f	8/10/2010 4:55	alive	5/19/2010	83	EPSG:31466	3514513.5	5431911.5	3514249	5431906	fed	crossed	natal
HF-64644	f	8/11/2010 18:45	alive	5/19/2010	84	EPSG:31466	3514245.75	5431906.5	3514249	5431906	fed	crossed	natal
HF-64644	f	8/14/2010 0:15	alive	5/19/2010	87	EPSG:31466	3514492.25	5431955.5	3514249	5431906	fed	crossed	natal
HF-64644	f	8/17/2010 22:22	alive	5/19/2010	90	EPSG:31466	3514462.75	5431996.5	3514249	5431906	fed	crossed	natal
HF-64644	f	8/20/2010 14:14	alive	5/19/2010	93	EPSG:31466	3514238	5431675	3514249	5431906	fed	crossed	natal
HF-64644	f	8/22/2010 2:10	alive	5/19/2010	95	EPSG:31466	3514028.5	5432160.5	3514249	5431906	fed	crossed	forays
HF-64644	f	8/27/2010 0:28	alive	5/19/2010	100	EPSG:31466	3514206.75	5432027.5	3514249	5431906	fed	crossed	natal
HF-64644	f	8/30/2010 0:53	alive	5/19/2010	103	EPSG:31466	3514251	5431901	3514249	5431906	fed	crossed	natal
HF-64644	f	9/3/2010 0:11	alive	5/19/2010	107	EPSG:31466	3514253	5431905	3514249	5431906	fed	crossed	natal
HF-64644	f	9/5/2010 3:39	alive	5/19/2010	109	EPSG:31466	3514137.75	5431975	3514249	5431906	fed	crossed	natal
HF-64644	f	9/8/2010 2:07	alive	5/19/2010	112	EPSG:31466	3514157	5431895.5	3514249	5431906	fed	crossed	natal
HF-64644	f	9/9/2010 16:26	alive	5/19/2010	113	EPSG:31466	3514249.25	5431907	3514249	5431906	fed	crossed	natal
HF-64644	f	9/10/2010 2:20	alive	5/19/2010	114	EPSG:31466	3514237.75	5431895	3514249	5431906	fed	crossed	natal
HF-64644	f	9/11/2010 23:56	alive	5/19/2010	115	EPSG:31466	3514151.75	5431888.5	3514249	5431906	fed	crossed	natal
HF-64644	f	9/12/2010 0:01	alive	5/19/2010	116	EPSG:31466	3514155	5431893.5	3514249	5431906	fed	crossed	natal
HF-64644	f	9/14/2010 6:25	alive	5/19/2010	118	EPSG:31466	3514366	5431814.5	3514249	5431906	fed	crossed	natal
HF-64644	f	9/16/2010 2:52	alive	5/19/2010	120	EPSG:31466	3514103	5431931.5	3514249	5431906	fed	crossed	natal
HF-64644	f	9/19/2010 2:09	alive	5/19/2010	123	EPSG:31466	3514108.75	5431916	3514249	5431906	fed	crossed	natal
HF-64644	f	9/20/2010 14:52	alive	5/19/2010	124	EPSG:31466	3514249.75	5431904	3514249	5431906	fed	crossed	natal
HF-64644	f	9/22/2010 3:49	alive	5/19/2010	126	EPSG:31466	3513967	5432215	3514249	5431906	fed	crossed	dispersal
HF-64644	f	9/26/2010 17:54	alive	5/19/2010	130	EPSG:31466	3518597.25	5431088.5	3514249	5431906	fed	crossed	dispersal
HF-64644	f	9/27/2010 4:21	alive	5/19/2010	131	EPSG:31466	3518453.25	5431300.5	3514249	5431906	fed	crossed	dispersal
HF-64644	f	9/28/2010 0:35	alive	5/19/2010	132	EPSG:31466	3518364.75	5431466	3514249	5431906	fed	crossed	dispersal
HF-64644	f	9/29/2010 23:59	alive	5/19/2010	133	EPSG:31466	3518342.25	5431430	3514249	5431906	fed	crossed	dispersal
HF-64644	f	9/30/2010 0:04	alive	5/19/2010	134	EPSG:31466	3518347	5431433.5	3514249	5431906	fed	crossed	dispersal
HF-64644	f	10/1/2010 21:43	alive	5/19/2010	135	EPSG:31466	3518368.5	5431448.5	3514249	5431906	fed	crossed	dispersal
HF-64644	f	10/3/2010 21:13	alive	5/19/2010	137	EPSG:31466	3518691.25	5431479	3514249	5431906	fed	crossed	dispersal
HF-64644	f	10/7/2010 16:34	alive	5/19/2010	141	EPSG:31466	3515609.5	5428062.5	3514249	5431906	fed	crossed	dispersal
HF-64644	f	10/8/2010 3:15	alive	5/19/2010	142	EPSG:31466	3515687.25	5428041.5	3514249	5431906	fed	crossed	dispersal
HF-64644	f	10/9/2010 0:43	alive	5/19/2010	143	EPSG:31466	3515621.5	5427839.5	3514249	5431906	fed	crossed	dispersal
HF-64644	f	10/10/2010 0:08	alive	5/19/2010	144	EPSG:31466	3515983.25	5426421	3514249	5431906	fed	crossed	dispersal
HF-64644	f	10/12/2010 23:44	alive	5/19/2010	146	EPSG:31466	3515637	5427654.5	3514249	5431906	fed	crossed	dispersal
HF-64644	f	10/17/2010 18:01	alive	5/19/2010	151	EPSG:31466	3515434.75	5427422	3514249	5431906	fed	crossed	dispersal
HF-64644	f	10/18/2010 22:42	alive	5/19/2010	152	EPSG:31466	3515132	5426949	3514249	5431906	fed	crossed	dispersal
HF-64644	f	10/21/2010 0:50	alive	5/19/2010	155	EPSG:31466	3515319	5427134	3514249	5431906	fed	crossed	dispersal
HF-64644	f	10/24/2010 23:40	alive	5/19/2010	158	EPSG:31466	3515147.75	5427015	3514249	5431906	fed	crossed	dispersal
HF-64644	f	10/29/2010 2:38	alive	5/19/2010	163	EPSG:31466	3515122.25	5426913	3514249	5431906	fed	crossed	dispersal
HF-64644	f	11/4/2010 15:21	alive	5/19/2010	169	EPSG:31466	3515476	5427370	3514249	5431906	fed	crossed	dispersal
HF-64644	f	11/5/2010 21:45	alive	5/19/2010	170	EPSG:31466	3515149	5426887.5	3514249	5431906	fed	crossed	dispersal
HF-64644	f	11/16/2010 21:34	alive	5/19/2010	181	EPSG:31466	3515253.25	5427080	3514249	5431906	fed	crossed	dispersal
HF-64644	f	11/23/2010 3:53	alive	5/19/2010	188	EPSG:31466	3515351.25	5427088	3514249	5431906	fed	crossed	dispersal
HF-64644	f	11/29/2010 13:34	alive	5/19/2010	194	EPSG:31466	3515446.5	5427428.5	3514249	5431906	fed	crossed	dispersal
HF-64644	f	12/2/2010 7:21	alive	5/19/2010	197	EPSG:31466	3515462	5427417	3514249	5431906	fed	crossed	dispersal
HF-64644	f	12/17/2010 23:21	alive	5/19/2010	212	EPSG:31466	3516197.5	5427110	3514249	5431906	fed	crossed	dispersal
HF-64644	f	12/20/2010 14:54	alive	5/19/2010	215	EPSG:31466	3515445.5	5427430.5	3514249	5431906	fed	crossed	dispersal
HF-64644	f	12/29/2010 2:05	alive	5/19/2010	224	EPSG:31466	3515891	5427238.5	3514249	5431906	fed	crossed	dispersal
HF-64644	f	1/11/2011 2:51	alive	5/19/2010	237	EPSG:31466	3515360	5427097	3514249	5431906	fed	crossed	dispersal
HF-64644	f	2/8/2011 15:24	alive	5/19/2010	265	EPSG:31466	3513528.25	5426698.5	3514249	5431906	fed	crossed	dispersal
HF-64644	f	2/12/2011 23:03	alive	5/19/2010	269	EPSG:31466	3513514.5	5426718	3514249	5431906	fed	crossed	dispersal
HF-64644	f	2/15/2011 12:50	alive	5/19/2010	272	EPSG:31466	3513531	5426696.5	3514249	5431906	fed	crossed	dispersal
HF-64644	f	2/20/2011 11:09	alive	5/19/2010	277	EPSG:31466	3513528.75	5426698.5	3514249	5431906	fed	crossed	dispersal
HF-64644	f	2/21/2011 0:57	alive	5/19/2010	278	EPSG:31466	3513438.5	5426782	3514249	5431906	fed	crossed	dispersal
HF-64644	f	3/1/2011 15:24	alive	5/19/2010	286	EPSG:31466	3513524.5	5426696.5	3514249	5431906	fed	crossed	dispersal
HF-64644	f	3/2/2011 20:45	alive	5/19/2010	287	EPSG:31466	3513236.25	5426633.5	3514249	5431906	fed	crossed	dispersal
HF-64644	f	3/9/2011 18:00	alive	5/19/2010	294	EPSG:31466	3513515	5426731.5	3514249	5431906	fed	crossed	dispersal
HF-64644	f	3/11/2011 0:12	alive	5/19/2010	296	EPSG:31466	3513587.75	5426667.5	3514249	5431906	fed	crossed	dispersal
HF-64648	f	6/10/2010 19:05	alive	5/19/2010	22	EPSG:31466	3514899	5431806	3514899	5431806	unfed	not_crossed	natal
HF-64648	f	6/18/2010 0:00	dead	5/19/2010	30	EPSG:31466	3514658	5432032	3514899	5431806	unfed	not_crossed	dispersal
HF-64649	f	6/10/2010 20:00	alive	5/15/2010	26	EPSG:31466	3514899	5431806	3514899	5431806	unfed	crossed	natal
HF-64649	f	6/30/2010 10:45	alive	5/15/2010	46	EPSG:31466	3514931.5	5431811.5	3514899	5431806	unfed	crossed	natal
HF-64649	f	7/2/2010 12:13	alive	5/15/2010	48	EPSG:31466	3514907.5	5431803.5	3514899	5431806	unfed	crossed	natal
HF-64649	f	7/4/2010 19:20	alive	5/15/2010	50	EPSG:31466	3514923.25	5431857	3514899	5431806	unfed	crossed	natal
HF-64649	f	7/5/2010 0:11	alive	5/15/2010	51	EPSG:31466	3514885.25	5431846	3514899	5431806	unfed	crossed	natal
HF-64649	f	7/6/2010 14:54	alive	5/15/2010	52	EPSG:31466	3514917.5	5431846	3514899	5431806	unfed	crossed	natal
HF-64649	f	7/10/2010 23:10	alive	5/15/2010	56	EPSG:31466	3514951.25	5431824	3514899	5431806	unfed	crossed	natal
HF-64649	f	7/13/2010 23:24	alive	5/15/2010	59	EPSG:31466	3514902.25	5431711	3514899	5431806	unfed	crossed	natal
HF-64649	f	7/14/2010 0:04	alive	5/15/2010	60	EPSG:31466	3514886	5431714	3514899	5431806	unfed	crossed	natal
HF-64649	f	7/17/2010 23:46	alive	5/15/2010	63	EPSG:31466	3514897.5	5431806	3514899	5431806	unfed	crossed	natal
HF-64649	f	7/21/2010 0:15	alive	5/15/2010	67	EPSG:31466	3514938.75	5431804	3514899	5431806	unfed	crossed	natal
HF-64649	f	7/24/2010 23:33	alive	5/15/2010	70	EPSG:31466	3515000	5431804	3514899	5431806	unfed	crossed	natal
HF-64649	f	7/26/2010 15:06	alive	5/15/2010	72	EPSG:31466	3514970.25	5431812.5	3514899	5431806	unfed	crossed	natal
HF-64649	f	7/28/2010 3:45	alive	5/15/2010	74	EPSG:31466	3514825.25	5431821	3514899	5431806	unfed	crossed	natal
HF-64649	f	7/31/2010 23:38	alive	5/15/2010	77	EPSG:31466	3514989	5431807	3514899	5431806	unfed	crossed	natal
HF-64649	f	8/3/2010 23:43	alive	5/15/2010	80	EPSG:31466	3515004.5	5431803	3514899	5431806	unfed	crossed	natal
HF-64649	f	8/10/2010 4:13	alive	5/15/2010	87	EPSG:31466	3515135.75	5431626	3514899	5431806	unfed	crossed	natal
HF-64649	f	8/11/2010 17:47	alive	5/15/2010	88	EPSG:31466	3514936.75	5431798	3514899	5431806	unfed	crossed	natal
HF-64649	f	8/13/2010 23:05	alive	5/15/2010	90	EPSG:31466	3515049	5431798.5	3514899	5431806	unfed	crossed	natal
HF-64649	f	8/17/2010 23:39	alive	5/15/2010	94	EPSG:31466	3514775.25	5432092.5	3514899	5431806	unfed	crossed	forays
HF-64649	f	8/20/2010 14:40	alive	5/15/2010	97	EPSG:31466	3514865.5	5431735.5	3514899	5431806	unfed	crossed	natal
HF-64649	f	8/21/2010 22:36	alive	5/15/2010	98	EPSG:31466	3515234	5431509.5	3514899	5431806	unfed	crossed	forays
HF-64649	f	8/27/2010 1:05	alive	5/15/2010	104	EPSG:31466	3514921.75	5431820	3514899	5431806	unfed	crossed	natal
HF-64649	f	8/30/2010 0:01	alive	5/15/2010	107	EPSG:31466	3514900.5	5431832	3514899	5431806	unfed	crossed	natal
HF-64649	f	9/2/2010 23:53	alive	5/15/2010	110	EPSG:31466	3515255	5432234	3514899	5431806	unfed	crossed	forays
HF-64649	f	9/5/2010 2:58	alive	5/15/2010	113	EPSG:31466	3515326.75	5432090.5	3514899	5431806	unfed	crossed	forays
HF-64649	f	9/8/2010 2:43	alive	5/15/2010	116	EPSG:31466	3515007.5	5431865	3514899	5431806	unfed	crossed	natal
HF-64649	f	9/9/2010 17:28	alive	5/15/2010	117	EPSG:31466	3514959.25	5431849.5	3514899	5431806	unfed	crossed	natal
HF-64649	f	9/10/2010 0:08	alive	5/15/2010	118	EPSG:31466	3515310	5432018.5	3514899	5431806	unfed	crossed	forays
HF-64649	f	9/12/2010 6:01	alive	5/15/2010	120	EPSG:31466	3515004.5	5431793.5	3514899	5431806	unfed	crossed	natal
HF-64649	f	9/14/2010 5:48	alive	5/15/2010	122	EPSG:31466	3514962.75	5431804.5	3514899	5431806	unfed	crossed	natal
HF-64649	f	9/16/2010 3:22	alive	5/15/2010	124	EPSG:31466	3515282.25	5432010.5	3514899	5431806	unfed	crossed	forays
HF-64649	f	9/19/2010 1:54	alive	5/15/2010	127	EPSG:31466	3515350.25	5431989	3514899	5431806	unfed	crossed	forays
HF-64649	f	9/20/2010 13:44	alive	5/15/2010	128	EPSG:31466	3514955.5	5431789.5	3514899	5431806	unfed	crossed	natal
HF-64649	f	9/22/2010 3:18	alive	5/15/2010	130	EPSG:31466	3515293.75	5432022	3514899	5431806	unfed	crossed	dispersal
HF-64649	f	9/24/2010 5:44	alive	5/15/2010	132	EPSG:31466	3512721	5429917	3514899	5431806	unfed	crossed	dispersal
HF-64649	f	9/26/2010 16:17	alive	5/15/2010	134	EPSG:31466	3512716	5429828	3514899	5431806	unfed	crossed	dispersal
HF-64649	f	9/27/2010 22:40	alive	5/15/2010	135	EPSG:31466	3513079	5429621	3514899	5431806	unfed	crossed	dispersal
HF-64649	f	9/29/2010 23:10	alive	5/15/2010	137	EPSG:31466	3512407.5	5429072.5	3514899	5431806	unfed	crossed	dispersal
HF-64649	f	10/2/2010 2:37	alive	5/15/2010	140	EPSG:31466	3513347	5429531.5	3514899	5431806	unfed	crossed	dispersal
HF-64649	f	10/3/2010 17:28	alive	5/15/2010	141	EPSG:31466	3512763.25	5429794	3514899	5431806	unfed	crossed	dispersal
HF-64649	f	10/7/2010 0:09	alive	5/15/2010	145	EPSG:31466	3512827	5429767	3514899	5431806	unfed	crossed	dispersal
HF-64649	f	10/9/2010 16:19	alive	5/15/2010	147	EPSG:31466	3512738.25	5429669	3514899	5431806	unfed	crossed	dispersal
HF-64649	f	10/10/2010 1:48	alive	5/15/2010	148	EPSG:31466	3513002.25	5429612	3514899	5431806	unfed	crossed	dispersal
HF-64649	f	10/12/2010 21:17	alive	5/15/2010	150	EPSG:31466	3512746	5429872.5	3514899	5431806	unfed	crossed	dispersal
HF-64649	f	10/17/2010 16:07	alive	5/15/2010	155	EPSG:31466	3512976.75	5429396.5	3514899	5431806	unfed	crossed	dispersal
HF-64649	f	10/18/2010 22:10	alive	5/15/2010	156	EPSG:31466	3512981	5429598.5	3514899	5431806	unfed	crossed	dispersal
HF-64649	f	10/21/2010 3:51	alive	5/15/2010	159	EPSG:31466	3513132	5429683.5	3514899	5431806	unfed	crossed	dispersal
HF-64649	f	10/24/2010 23:51	alive	5/15/2010	162	EPSG:31466	3513073.25	5429459.5	3514899	5431806	unfed	crossed	dispersal
HF-64649	f	10/29/2010 3:21	alive	5/15/2010	167	EPSG:31466	3512693	5429298.5	3514899	5431806	unfed	crossed	dispersal
HF-64649	f	11/1/2010 23:30	alive	5/15/2010	170	EPSG:31466	3512954.75	5429729	3514899	5431806	unfed	crossed	dispersal
HF-64649	f	11/5/2010 22:11	alive	5/15/2010	174	EPSG:31466	3512154	5428950.5	3514899	5431806	unfed	crossed	dispersal
HF-64649	f	11/16/2010 16:50	alive	5/15/2010	185	EPSG:31466	3512917.25	5429449.5	3514899	5431806	unfed	crossed	dispersal
HF-64649	f	11/23/2010 6:55	alive	5/15/2010	192	EPSG:31466	3512479.5	5429499	3514899	5431806	unfed	crossed	dispersal
HF-64649	f	11/29/2010 10:36	alive	5/15/2010	198	EPSG:31466	3512865.25	5429625.5	3514899	5431806	unfed	crossed	dispersal
HF-64649	f	12/2/2010 6:33	alive	5/15/2010	201	EPSG:31466	3512598.5	5429615.5	3514899	5431806	unfed	crossed	dispersal
HF-64649	f	12/17/2010 22:00	alive	5/15/2010	216	EPSG:31466	3512563.5	5429758	3514899	5431806	unfed	crossed	dispersal
HF-64649	f	12/20/2010 14:21	alive	5/15/2010	219	EPSG:31466	3512857	5429623	3514899	5431806	unfed	crossed	dispersal
HF-64649	f	12/29/2010 3:01	alive	5/15/2010	228	EPSG:31466	3512419.25	5429578.5	3514899	5431806	unfed	crossed	dispersal
HF-64649	f	1/11/2011 4:06	alive	5/15/2010	241	EPSG:31466	3512427.25	5429466	3514899	5431806	unfed	crossed	dispersal
HF-64649	f	1/28/2011 21:03	alive	5/15/2010	258	EPSG:31466	3512423.75	5429492.5	3514899	5431806	unfed	crossed	dispersal
HF-64649	f	2/2/2011 20:05	alive	5/15/2010	263	EPSG:31466	3512487.25	5429385.5	3514899	5431806	unfed	crossed	dispersal
HF-64649	f	2/8/2011 16:24	alive	5/15/2010	269	EPSG:31466	3512854.5	5429617	3514899	5431806	unfed	crossed	dispersal
HF-64649	f	2/12/2011 23:39	alive	5/15/2010	273	EPSG:31466	3512425.25	5429485.5	3514899	5431806	unfed	crossed	dispersal
HF-64649	f	2/15/2011 12:17	alive	5/15/2010	276	EPSG:31466	3512855.75	5429618.5	3514899	5431806	unfed	crossed	dispersal
HF-64649	f	2/20/2011 11:31	alive	5/15/2010	281	EPSG:31466	3512854	5429618.5	3514899	5431806	unfed	crossed	dispersal
HF-64649	f	2/21/2011 1:32	alive	5/15/2010	282	EPSG:31466	3512523	5429409.5	3514899	5431806	unfed	crossed	dispersal
HF-64649	f	2/22/2011 17:22	alive	5/15/2010	283	EPSG:31466	3512856	5429623	3514899	5431806	unfed	crossed	dispersal
HF-64649	f	3/1/2011 15:53	alive	5/15/2010	290	EPSG:31466	3512856.75	5429622	3514899	5431806	unfed	crossed	dispersal
HF-64649	f	3/3/2011 2:02	alive	5/15/2010	292	EPSG:31466	3512510.75	5429396	3514899	5431806	unfed	crossed	dispersal
HF-64649	f	3/8/2011 11:21	alive	5/15/2010	297	EPSG:31466	3512856.75	5429620.5	3514899	5431806	unfed	crossed	dispersal
HF-64650	m	6/10/2010 19:45	alive	5/17/2010	24	EPSG:31466	3514899	5431806	3514899	5431806	unfed	not_crossed	natal
HF-64650	m	6/30/2010 10:44	alive	5/17/2010	44	EPSG:31466	3514922.75	5431802.5	3514899	5431806	unfed	not_crossed	natal
HF-64650	m	7/2/2010 12:12	alive	5/17/2010	46	EPSG:31466	3514918.25	5431825	3514899	5431806	unfed	not_crossed	natal
HF-64650	m	7/4/2010 19:18	alive	5/17/2010	48	EPSG:31466	3514929.25	5431849.5	3514899	5431806	unfed	not_crossed	natal
HF-64650	m	7/5/2010 0:07	alive	5/17/2010	49	EPSG:31466	3514974.75	5431792	3514899	5431806	unfed	not_crossed	natal
HF-64650	m	7/6/2010 14:46	alive	5/17/2010	50	EPSG:31466	3514947	5431810	3514899	5431806	unfed	not_crossed	natal
HF-64650	m	7/10/2010 23:05	alive	5/17/2010	54	EPSG:31466	3514803.25	5431830	3514899	5431806	unfed	not_crossed	natal
HF-64650	m	7/13/2010 23:12	alive	5/17/2010	57	EPSG:31466	3514953.25	5431819	3514899	5431806	unfed	not_crossed	natal
HF-64650	m	7/14/2010 16:01	alive	5/17/2010	58	EPSG:31466	3514924	5431840	3514899	5431806	unfed	not_crossed	natal
HF-64650	m	7/17/2010 23:33	alive	5/17/2010	61	EPSG:31466	3514895.5	5431800.5	3514899	5431806	unfed	not_crossed	natal
HF-64650	m	7/21/2010 17:59	alive	5/17/2010	65	EPSG:31466	3514934.25	5431783	3514899	5431806	unfed	not_crossed	natal
HF-64650	m	7/24/2010 23:05	alive	5/17/2010	68	EPSG:31466	3514992.75	5431768	3514899	5431806	unfed	not_crossed	natal
HF-64650	m	7/26/2010 15:01	alive	5/17/2010	70	EPSG:31466	3514969.75	5431804.5	3514899	5431806	unfed	not_crossed	natal
HF-64650	m	7/28/2010 3:43	alive	5/17/2010	72	EPSG:31466	3514867.25	5431798.5	3514899	5431806	unfed	not_crossed	natal
HF-64650	m	7/31/2010 23:20	alive	5/17/2010	75	EPSG:31466	3514904.25	5431790.5	3514899	5431806	unfed	not_crossed	natal
HF-64650	m	8/3/2010 23:58	alive	5/17/2010	78	EPSG:31466	3515033.5	5431548.5	3514899	5431806	unfed	not_crossed	natal
HF-64650	m	8/10/2010 4:00	alive	5/17/2010	85	EPSG:31466	3514897.25	5431804.5	3514899	5431806	unfed	not_crossed	natal
HF-64650	m	8/11/2010 17:30	alive	5/17/2010	86	EPSG:31466	3514934.75	5431787.5	3514899	5431806	unfed	not_crossed	natal
HF-64650	m	8/13/2010 23:00	alive	5/17/2010	88	EPSG:31466	3514905.5	5431802.5	3514899	5431806	unfed	not_crossed	natal
HF-64650	m	8/17/2010 23:09	alive	5/17/2010	92	EPSG:31466	3514935	5431878.5	3514899	5431806	unfed	not_crossed	natal
HF-64650	m	8/20/2010 14:50	alive	5/17/2010	95	EPSG:31466	3514955.25	5431783	3514899	5431806	unfed	not_crossed	natal
HF-64650	m	8/21/2010 23:31	alive	5/17/2010	96	EPSG:31466	3514693	5432061.5	3514899	5431806	unfed	not_crossed	forays
HF-64650	m	8/27/2010 0:36	alive	5/17/2010	102	EPSG:31466	3514548.25	5431889	3514899	5431806	unfed	not_crossed	forays
HF-64650	m	8/29/2010 23:35	alive	5/17/2010	104	EPSG:31466	3514901.75	5431809.5	3514899	5431806	unfed	not_crossed	natal
HF-64650	m	8/30/2010 12:37	alive	5/17/2010	105	EPSG:31466	3514916.75	5431807	3514899	5431806	unfed	not_crossed	natal
HF-64650	m	9/2/2010 23:52	alive	5/17/2010	108	EPSG:31466	3514690	5432253	3514899	5431806	unfed	not_crossed	forays
HF-64650	m	9/5/2010 2:34	alive	5/17/2010	111	EPSG:31466	3514837	5432284	3514899	5431806	unfed	not_crossed	forays
HF-64650	m	9/8/2010 3:17	alive	5/17/2010	114	EPSG:31466	3514568	5432476.5	3514899	5431806	unfed	not_crossed	forays
HF-64650	m	9/9/2010 17:40	alive	5/17/2010	115	EPSG:31466	3514955.75	5431818	3514899	5431806	unfed	not_crossed	natal
HF-64650	m	9/10/2010 1:27	alive	5/17/2010	116	EPSG:31466	3514901	5431802.5	3514899	5431806	unfed	not_crossed	natal
HF-64650	m	9/12/2010 5:55	alive	5/17/2010	118	EPSG:31466	3514992	5431808.5	3514899	5431806	unfed	not_crossed	natal
HF-64650	m	9/14/2010 5:38	alive	5/17/2010	120	EPSG:31466	3514900.25	5431815	3514899	5431806	unfed	not_crossed	natal
HF-64650	m	9/16/2010 3:44	alive	5/17/2010	122	EPSG:31466	3514827.25	5432359.5	3514899	5431806	unfed	not_crossed	forays
HF-64650	m	9/19/2010 1:40	alive	5/17/2010	125	EPSG:31466	3514964.75	5432341	3514899	5431806	unfed	not_crossed	forays
HF-64650	m	9/20/2010 13:36	alive	5/17/2010	126	EPSG:31466	3514957.25	5431781.5	3514899	5431806	unfed	not_crossed	natal
HF-64650	m	9/22/2010 3:32	alive	5/17/2010	128	EPSG:31466	3515555	5432369	3514899	5431806	unfed	not_crossed	dispersal
HF-64650	m	9/25/2010 23:46	alive	5/17/2010	131	EPSG:31466	3510824	5442331	3514899	5431806	unfed	not_crossed	dispersal
HF-64650	m	9/26/2010 0:06	alive	5/17/2010	132	EPSG:31466	3510569.75	5442293.5	3514899	5431806	unfed	not_crossed	dispersal
HF-64650	m	9/28/2010 21:47	alive	5/17/2010	134	EPSG:31466	3509852.75	5442024.5	3514899	5431806	unfed	not_crossed	dispersal
HF-64650	m	9/29/2010 22:31	alive	5/17/2010	135	EPSG:31466	3510824.25	5442339.5	3514899	5431806	unfed	not_crossed	dispersal
HF-64650	m	9/30/2010 22:21	alive	5/17/2010	136	EPSG:31466	3509974.25	5442218.5	3514899	5431806	unfed	not_crossed	dispersal
HF-64650	m	10/1/2010 23:43	alive	5/17/2010	137	EPSG:31466	3509980.75	5442208.5	3514899	5431806	unfed	not_crossed	dispersal
HF-64650	m	10/3/2010 23:11	alive	5/17/2010	139	EPSG:31466	3510225.75	5442107.5	3514899	5431806	unfed	not_crossed	dispersal
HF-64650	m	10/5/2010 22:47	alive	5/17/2010	141	EPSG:31466	3510678.75	5442506.5	3514899	5431806	unfed	not_crossed	dispersal
HF-64650	m	10/10/2010 1:48	alive	5/17/2010	146	EPSG:31466	3510573.5	5442329.5	3514899	5431806	unfed	not_crossed	dispersal
HF-64650	m	10/13/2010 0:24	alive	5/17/2010	149	EPSG:31466	3510178	5442157	3514899	5431806	unfed	not_crossed	dispersal
HF-64650	m	10/18/2010 2:24	alive	5/17/2010	154	EPSG:31466	3510486.75	5442390.5	3514899	5431806	unfed	not_crossed	dispersal
HF-64650	m	10/20/2010 23:05	alive	5/17/2010	156	EPSG:31466	3510324	5442222	3514899	5431806	unfed	not_crossed	dispersal
HF-64650	m	10/21/2010 16:46	alive	5/17/2010	157	EPSG:31466	3510764.5	5442362	3514899	5431806	unfed	not_crossed	dispersal
HF-64650	m	10/25/2010 1:52	alive	5/17/2010	161	EPSG:31466	3510729.75	5442352	3514899	5431806	unfed	not_crossed	dispersal
HF-64650	m	10/28/2010 22:58	alive	5/17/2010	164	EPSG:31466	3510006	5442264	3514899	5431806	unfed	not_crossed	dispersal
HF-64650	m	11/4/2010 16:07	alive	5/17/2010	171	EPSG:31466	3510752.25	5442375.5	3514899	5431806	unfed	not_crossed	dispersal
HF-64650	m	11/6/2010 1:32	alive	5/17/2010	173	EPSG:31466	3510183	5442057	3514899	5431806	unfed	not_crossed	dispersal
HF-64650	m	11/15/2010 21:18	alive	5/17/2010	182	EPSG:31466	3510477.25	5442402.5	3514899	5431806	unfed	not_crossed	dispersal
HF-64650	m	11/16/2010 10:38	alive	5/17/2010	183	EPSG:31466	3510745	5442364.5	3514899	5431806	unfed	not_crossed	dispersal
HF-64650	m	11/21/2010 23:53	alive	5/17/2010	188	EPSG:31466	3510193.75	5442049.5	3514899	5431806	unfed	not_crossed	dispersal
HF-64650	m	11/24/2010 15:50	alive	5/17/2010	191	EPSG:31466	3510754.25	5442378	3514899	5431806	unfed	not_crossed	dispersal
HF-64650	m	12/2/2010 4:31	alive	5/17/2010	199	EPSG:31466	3510678	5442429	3514899	5431806	unfed	not_crossed	dispersal
HF-64650	m	12/16/2010 16:43	alive	5/17/2010	213	EPSG:31466	3510804.75	5442442.5	3514899	5431806	unfed	not_crossed	dispersal
HF-64650	m	12/29/2010 5:39	alive	5/17/2010	226	EPSG:31466	3510451.25	5442507	3514899	5431806	unfed	not_crossed	dispersal
HF-64650	m	1/18/2011 1:54	alive	5/17/2010	246	EPSG:31466	3510368.25	5442381.5	3514899	5431806	unfed	not_crossed	dispersal
HF-64650	m	1/29/2011 21:34	alive	5/17/2010	257	EPSG:31466	3510547.75	5442968	3514899	5431806	unfed	not_crossed	dispersal
HF-64650	m	2/2/2011 22:48	alive	5/17/2010	261	EPSG:31466	3510512.75	5442815.5	3514899	5431806	unfed	not_crossed	dispersal
HF-64650	m	2/6/2011 18:02	alive	5/17/2010	265	EPSG:31466	3510865.25	5442482	3514899	5431806	unfed	not_crossed	dispersal
HF-64650	m	2/14/2011 16:32	alive	5/17/2010	273	EPSG:31466	3510727.25	5442388.5	3514899	5431806	unfed	not_crossed	dispersal
HF-64650	m	2/18/2011 15:08	alive	5/17/2010	277	EPSG:31466	3508084	5442534	3514899	5431806	unfed	not_crossed	dispersal
HF-64650	m	2/21/2011 3:18	alive	5/17/2010	280	EPSG:31466	3508042	5442339	3514899	5431806	unfed	not_crossed	dispersal
HF-64650	m	3/3/2011 14:59	dead	5/17/2010	291	EPSG:31466	3507917.5	5442422.5	3514899	5431806	unfed	not_crossed	dispersal
HF-64677	f	6/15/2010 14:30	alive	5/17/2010	29	EPSG:31466	3504721	5426918.5	3504721	5426918	fed	not_crossed	natal
HF-64677	f	6/30/2010 9:04	alive	5/17/2010	44	EPSG:31466	3504692	5426923.5	3504721	5426918	fed	not_crossed	natal
HF-64677	f	7/2/2010 10:32	alive	5/17/2010	46	EPSG:31466	3504727.25	5426916	3504721	5426918	fed	not_crossed	natal
HF-64677	f	7/4/2010 11:01	alive	5/17/2010	48	EPSG:31466	3504726.25	5426920	3504721	5426918	fed	not_crossed	natal
HF-64677	f	7/6/2010 12:27	alive	5/17/2010	50	EPSG:31466	3504732	5426912.5	3504721	5426918	fed	not_crossed	natal
HF-64677	f	7/9/2010 9:16	alive	5/17/2010	53	EPSG:31466	3504704.75	5426925	3504721	5426918	fed	not_crossed	natal
HF-64677	f	7/10/2010 1:59	alive	5/17/2010	54	EPSG:31466	3504660	5427041	3504721	5426918	fed	not_crossed	natal
HF-64677	f	7/12/2010 16:34	alive	5/17/2010	56	EPSG:31466	3504740.25	5426916.5	3504721	5426918	fed	not_crossed	natal
HF-64677	f	7/17/2010 3:02	alive	5/17/2010	61	EPSG:31466	3504710.25	5426927.5	3504721	5426918	fed	not_crossed	natal
HF-64677	f	7/19/2010 22:23	alive	5/17/2010	63	EPSG:31466	3504753	5426924.5	3504721	5426918	fed	not_crossed	natal
HF-64677	f	7/25/2010 13:32	alive	5/17/2010	69	EPSG:31466	3504724.25	5426916	3504721	5426918	fed	not_crossed	natal
HF-64677	f	7/27/2010 1:44	alive	5/17/2010	71	EPSG:31466	3504711	5426928.5	3504721	5426918	fed	not_crossed	natal
HF-64677	f	7/30/2010 23:53	alive	5/17/2010	74	EPSG:31466	3504918.25	5426886	3504721	5426918	fed	not_crossed	natal
HF-64677	f	8/3/2010 2:20	alive	5/17/2010	78	EPSG:31466	3504657.5	5427056.5	3504721	5426918	fed	not_crossed	natal
HF-64677	f	8/8/2010 18:14	alive	5/17/2010	83	EPSG:31466	3504754.5	5426880.5	3504721	5426918	fed	not_crossed	natal
HF-64677	f	8/11/2010 4:50	alive	5/17/2010	86	EPSG:31466	3505086.5	5427144	3504721	5426918	fed	not_crossed	forays
HF-64677	f	8/17/2010 3:05	alive	5/17/2010	92	EPSG:31466	3504731.5	5426917.5	3504721	5426918	fed	not_crossed	natal
HF-64677	f	8/20/2010 22:37	alive	5/17/2010	95	EPSG:31466	3504664.5	5427008	3504721	5426918	fed	not_crossed	natal
HF-64677	f	8/25/2010 21:35	alive	5/17/2010	100	EPSG:31466	3504594	5426020.5	3504721	5426918	fed	not_crossed	forays
HF-64677	f	8/28/2010 22:05	alive	5/17/2010	103	EPSG:31466	3504577	5427048	3504721	5426918	fed	not_crossed	natal
HF-64677	f	8/29/2010 10:58	alive	5/17/2010	104	EPSG:31466	3504709.5	5426926.5	3504721	5426918	fed	not_crossed	natal
HF-64677	f	9/3/2010 23:22	alive	5/17/2010	109	EPSG:31466	3504387.25	5427081	3504721	5426918	fed	not_crossed	forays
HF-64677	f	9/6/2010 1:49	alive	5/17/2010	112	EPSG:31466	3504341.5	5425836.5	3504721	5426918	fed	not_crossed	forays
HF-64677	f	9/8/2010 23:36	alive	5/17/2010	114	EPSG:31466	3504615	5427147	3504721	5426918	fed	not_crossed	natal
HF-64677	f	9/12/2010 3:52	alive	5/17/2010	118	EPSG:31466	3504589.75	5427069	3504721	5426918	fed	not_crossed	natal
HF-64677	f	9/14/2010 23:36	alive	5/17/2010	120	EPSG:31466	3504473.5	5427072.5	3504721	5426918	fed	not_crossed	natal
HF-64677	f	9/17/2010 3:57	alive	5/17/2010	123	EPSG:31466	3504729.5	5426914.5	3504721	5426918	fed	not_crossed	natal
HF-64677	f	9/19/2010 17:45	alive	5/17/2010	125	EPSG:31466	3504760.25	5426875.5	3504721	5426918	fed	not_crossed	natal
HF-64677	f	9/21/2010 6:35	alive	5/17/2010	127	EPSG:31466	3504783.25	5426934.5	3504721	5426918	fed	not_crossed	natal
HF-64677	f	9/23/2010 21:03	alive	5/17/2010	129	EPSG:31466	3504427.75	5425864.5	3504721	5426918	fed	not_crossed	forays
HF-64677	f	9/24/2010 20:55	alive	5/17/2010	130	EPSG:31466	3504717.5	5426817	3504721	5426918	fed	not_crossed	natal
HF-64677	f	9/27/2010 5:30	alive	5/17/2010	133	EPSG:31466	3504979.75	5426832	3504721	5426918	fed	not_crossed	natal
HF-64677	f	9/29/2010 1:30	alive	5/17/2010	135	EPSG:31466	3503607.5	5429535.5	3504721	5426918	fed	not_crossed	forays
HF-64677	f	9/30/2010 1:32	alive	5/17/2010	136	EPSG:31466	3506473.25	5425415	3504721	5426918	fed	not_crossed	forays
HF-64677	f	10/2/2010 2:57	alive	5/17/2010	138	EPSG:31466	3506454	5425442	3504721	5426918	fed	not_crossed	forays
HF-64677	f	10/3/2010 20:39	alive	5/17/2010	139	EPSG:31466	3504756.5	5426919.5	3504721	5426918	fed	not_crossed	natal
HF-64677	f	10/7/2010 1:02	alive	5/17/2010	143	EPSG:31466	3504568.75	5427047.5	3504721	5426918	fed	not_crossed	natal
HF-64677	f	10/10/2010 0:25	alive	5/17/2010	146	EPSG:31466	3504779.5	5426255.5	3504721	5426918	fed	not_crossed	dispersal
HF-64677	f	10/13/2010 1:48	alive	5/17/2010	149	EPSG:31466	3506373	5425300	3504721	5426918	fed	not_crossed	dispersal
HF-64677	f	10/15/2010 12:09	alive	5/17/2010	151	EPSG:31466	3505773.25	5425689.5	3504721	5426918	fed	not_crossed	dispersal
HF-64677	f	10/19/2010 3:29	alive	5/17/2010	155	EPSG:31466	3505874.75	5426329.5	3504721	5426918	fed	not_crossed	dispersal
HF-64677	f	10/20/2010 23:12	alive	5/17/2010	156	EPSG:31466	3506624.75	5425388	3504721	5426918	fed	not_crossed	dispersal
HF-64677	f	10/24/2010 23:00	alive	5/17/2010	160	EPSG:31466	3505994.25	5425937.5	3504721	5426918	fed	not_crossed	dispersal
HF-64677	f	10/25/2010 16:40	alive	5/17/2010	161	EPSG:31466	3505541.75	5425577	3504721	5426918	fed	not_crossed	dispersal
HF-64677	f	11/1/2010 22:23	alive	5/17/2010	168	EPSG:31466	3505940.5	5426031	3504721	5426918	fed	not_crossed	dispersal
HF-64677	f	11/7/2010 14:23	alive	5/17/2010	174	EPSG:31466	3505496.25	5425694	3504721	5426918	fed	not_crossed	dispersal
HF-64677	f	11/17/2010 9:06	alive	5/17/2010	184	EPSG:31466	3505469.25	5425682	3504721	5426918	fed	not_crossed	dispersal
HF-64677	f	11/20/2010 0:38	alive	5/17/2010	187	EPSG:31466	3504769.25	5426003	3504721	5426918	fed	not_crossed	dispersal
HF-64677	f	11/28/2010 15:45	alive	5/17/2010	195	EPSG:31466	3505496	5425686.5	3504721	5426918	fed	not_crossed	dispersal
HF-64677	f	11/30/2010 4:09	alive	5/17/2010	197	EPSG:31466	3505585	5426571.5	3504721	5426918	fed	not_crossed	dispersal
HF-64678	f	6/15/2010 14:30	alive	5/17/2010	29	EPSG:31466	3504721	5426918.5	3504721	5426918	fed	crossed	natal
HF-64678	f	6/30/2010 12:45	alive	5/17/2010	44	EPSG:31466	3504702.75	5426918.5	3504721	5426918	fed	crossed	natal
HF-64678	f	7/2/2010 10:31	alive	5/17/2010	46	EPSG:31466	3504751	5426918.5	3504721	5426918	fed	crossed	natal
HF-64678	f	7/4/2010 10:57	alive	5/17/2010	48	EPSG:31466	3504751.25	5426921.5	3504721	5426918	fed	crossed	natal
HF-64678	f	7/6/2010 12:29	alive	5/17/2010	50	EPSG:31466	3504730.75	5426915	3504721	5426918	fed	crossed	natal
HF-64678	f	7/9/2010 9:14	alive	5/17/2010	53	EPSG:31466	3504769	5426932	3504721	5426918	fed	crossed	natal
HF-64678	f	7/10/2010 1:52	alive	5/17/2010	54	EPSG:31466	3504713	5426917.5	3504721	5426918	fed	crossed	natal
HF-64678	f	7/12/2010 16:39	alive	5/17/2010	56	EPSG:31466	3504751.75	5426923	3504721	5426918	fed	crossed	natal
HF-64678	f	7/17/2010 2:51	alive	5/17/2010	61	EPSG:31466	3504715.75	5426929	3504721	5426918	fed	crossed	natal
HF-64678	f	7/19/2010 16:52	alive	5/17/2010	63	EPSG:31466	3504758.75	5426918	3504721	5426918	fed	crossed	natal
HF-64678	f	7/25/2010 13:37	alive	5/17/2010	69	EPSG:31466	3504739.5	5426915	3504721	5426918	fed	crossed	natal
HF-64678	f	7/27/2010 1:50	alive	5/17/2010	71	EPSG:31466	3504912.75	5426856.5	3504721	5426918	fed	crossed	natal
HF-64678	f	7/30/2010 23:04	alive	5/17/2010	74	EPSG:31466	3504917.5	5426893.5	3504721	5426918	fed	crossed	natal
HF-64678	f	8/3/2010 2:42	alive	5/17/2010	78	EPSG:31466	3504731	5427062.5	3504721	5426918	fed	crossed	natal
HF-64678	f	8/8/2010 18:37	alive	5/17/2010	83	EPSG:31466	3504708.75	5426918	3504721	5426918	fed	crossed	natal
HF-64678	f	8/11/2010 5:07	alive	5/17/2010	86	EPSG:31466	3504815	5426859.5	3504721	5426918	fed	crossed	natal
HF-64678	f	8/17/2010 3:00	alive	5/17/2010	92	EPSG:31466	3504657.75	5427052.5	3504721	5426918	fed	crossed	natal
HF-64678	f	8/20/2010 22:39	alive	5/17/2010	95	EPSG:31466	3504682.5	5427029.5	3504721	5426918	fed	crossed	natal
HF-64678	f	8/25/2010 22:25	alive	5/17/2010	100	EPSG:31466	3504240.25	5425279.5	3504721	5426918	fed	crossed	forays
HF-64678	f	8/28/2010 21:57	alive	5/17/2010	103	EPSG:31466	3504659.5	5427282	3504721	5426918	fed	crossed	forays
HF-64678	f	8/29/2010 11:15	alive	5/17/2010	104	EPSG:31466	3504748.75	5426910.5	3504721	5426918	fed	crossed	natal
HF-64678	f	9/3/2010 23:33	alive	5/17/2010	109	EPSG:31466	3504469.5	5426748	3504721	5426918	fed	crossed	forays
HF-64678	f	9/6/2010 0:54	alive	5/17/2010	112	EPSG:31466	3504933	5427129	3504721	5426918	fed	crossed	natal
HF-64678	f	9/8/2010 23:43	alive	5/17/2010	114	EPSG:31466	3504482.75	5427119	3504721	5426918	fed	crossed	forays
HF-64678	f	9/12/2010 3:31	alive	5/17/2010	118	EPSG:31466	3505120.75	5427018.5	3504721	5426918	fed	crossed	forays
HF-64678	f	9/14/2010 22:35	alive	5/17/2010	120	EPSG:31466	3505361.25	5427218	3504721	5426918	fed	crossed	forays
HF-64678	f	9/17/2010 3:42	alive	5/17/2010	123	EPSG:31466	3504656.5	5427050.5	3504721	5426918	fed	crossed	natal
HF-64678	f	9/19/2010 3:40	alive	5/17/2010	125	EPSG:31466	3505274.75	5426569	3504721	5426918	fed	crossed	forays
HF-64678	f	9/21/2010 6:50	alive	5/17/2010	127	EPSG:31466	3504725.25	5426917.5	3504721	5426918	fed	crossed	natal
HF-64678	f	9/22/2010 22:42	alive	5/17/2010	128	EPSG:31466	3501169.25	5425612	3504721	5426918	fed	crossed	forays
HF-64678	f	9/23/2010 23:31	alive	5/17/2010	129	EPSG:31466	3498383.5	5426668.5	3504721	5426918	fed	crossed	forays
HF-64678	f	9/24/2010 1:20	alive	5/17/2010	130	EPSG:31466	3499233.25	5425896.5	3504721	5426918	fed	crossed	forays
HF-64678	f	9/27/2010 4:53	alive	5/17/2010	133	EPSG:31466	3504807.25	5426902	3504721	5426918	fed	crossed	natal
HF-64678	f	10/2/2010 2:19	alive	5/17/2010	138	EPSG:31466	3504645.25	5427104.5	3504721	5426918	fed	crossed	natal
HF-64678	f	10/3/2010 20:31	alive	5/17/2010	139	EPSG:31466	3504471.5	5427217	3504721	5426918	fed	crossed	forays
HF-64678	f	10/7/2010 13:59	alive	5/17/2010	143	EPSG:31466	3504721	5426914.5	3504721	5426918	fed	crossed	natal
HF-64678	f	10/9/2010 23:59	alive	5/17/2010	145	EPSG:31466	3504394.75	5426947	3504721	5426918	fed	crossed	dispersal
HF-64678	f	10/10/2010 0:04	alive	5/17/2010	146	EPSG:31466	3504379.25	5426950	3504721	5426918	fed	crossed	dispersal
HF-64678	f	10/12/2010 21:43	alive	5/17/2010	148	EPSG:31466	3499246.5	5418949.5	3504721	5426918	fed	crossed	dispersal
HF-64678	f	10/13/2010 22:15	alive	5/17/2010	149	EPSG:31466	3499030.5	5419403	3504721	5426918	fed	crossed	dispersal
HF-64678	f	10/19/2010 22:22	alive	5/17/2010	155	EPSG:31466	3499636.75	5418878.5	3504721	5426918	fed	crossed	dispersal
HF-64678	f	10/20/2010 12:14	alive	5/17/2010	156	EPSG:31466	3499612.5	5418842.5	3504721	5426918	fed	crossed	dispersal
HF-64678	f	10/21/2010 17:30	alive	5/17/2010	157	EPSG:31466	3498578.5	5420787	3504721	5426918	fed	crossed	dispersal
HF-64678	f	10/23/2010 23:18	alive	5/17/2010	159	EPSG:31466	3504968.25	5420374	3504721	5426918	fed	crossed	dispersal
HF-64678	f	10/25/2010 22:28	alive	5/17/2010	161	EPSG:31466	3504793	5420313	3504721	5426918	fed	crossed	dispersal
HF-64678	f	10/27/2010 4:16	alive	5/17/2010	163	EPSG:31466	3505264.5	5419548.5	3504721	5426918	fed	crossed	dispersal
HF-64678	f	11/3/2010 18:08	alive	5/17/2010	170	EPSG:31466	3504936.75	5421411	3504721	5426918	fed	crossed	dispersal
HF-64678	f	11/6/2010 14:01	alive	5/17/2010	173	EPSG:31466	3505183.25	5421301.5	3504721	5426918	fed	crossed	dispersal
HF-64678	f	11/8/2010 1:38	alive	5/17/2010	175	EPSG:31466	3505171	5421286	3504721	5426918	fed	crossed	dispersal
HF-64678	f	11/18/2010 13:46	alive	5/17/2010	185	EPSG:31466	3505183	5421300	3504721	5426918	fed	crossed	dispersal
HF-64678	f	11/19/2010 22:08	alive	5/17/2010	186	EPSG:31466	3505477	5423013.5	3504721	5426918	fed	crossed	dispersal
HF-64678	f	11/23/2010 16:10	alive	5/17/2010	190	EPSG:31466	3505179.5	5421309	3504721	5426918	fed	crossed	dispersal
HF-64678	f	11/29/2010 1:43	alive	5/17/2010	196	EPSG:31466	3505407.25	5422852	3504721	5426918	fed	crossed	dispersal
HF-64678	f	12/2/2010 14:45	alive	5/17/2010	199	EPSG:31466	3505185.5	5421301	3504721	5426918	fed	crossed	dispersal
HF-64678	f	12/15/2010 21:01	alive	5/17/2010	212	EPSG:31466	3505125.75	5421522.5	3504721	5426918	fed	crossed	dispersal
HF-64678	f	12/19/2010 14:26	alive	5/17/2010	216	EPSG:31466	3505627.75	5422248	3504721	5426918	fed	crossed	dispersal
HF-64678	f	12/21/2010 22:47	alive	5/17/2010	218	EPSG:31466	3505898.25	5424239.5	3504721	5426918	fed	crossed	dispersal
HF-64678	f	12/27/2010 16:07	alive	5/17/2010	224	EPSG:31466	3505626.25	5422249.5	3504721	5426918	fed	crossed	dispersal
HF-64678	f	12/30/2010 21:20	alive	5/17/2010	227	EPSG:31466	3507239.25	5424131.5	3504721	5426918	fed	crossed	dispersal
HF-64678	f	1/13/2011 22:34	alive	5/17/2010	241	EPSG:31466	3505919.5	5424778	3504721	5426918	fed	crossed	dispersal
HF-64678	f	1/27/2011 14:25	alive	5/17/2010	255	EPSG:31466	3505180.5	5421284.5	3504721	5426918	fed	crossed	dispersal
HF-64678	f	1/31/2011 15:54	alive	5/17/2010	259	EPSG:31466	3505206	5421320.5	3504721	5426918	fed	crossed	dispersal
HF-64678	f	2/4/2011 9:22	alive	5/17/2010	263	EPSG:31466	3505198	5421308	3504721	5426918	fed	crossed	dispersal
HF-64678	f	2/7/2011 22:18	alive	5/17/2010	266	EPSG:31466	3506632	5422483	3504721	5426918	fed	crossed	dispersal
HF-64678	f	2/11/2011 12:35	alive	5/17/2010	270	EPSG:31466	3506486.75	5422398	3504721	5426918	fed	crossed	dispersal
HF-64678	f	2/13/2011 21:05	alive	5/17/2010	272	EPSG:31466	3506480	5422390.5	3504721	5426918	fed	crossed	dispersal
HF-64678	f	2/17/2011 10:47	alive	5/17/2010	276	EPSG:31466	3506489.25	5422399	3504721	5426918	fed	crossed	dispersal
HF-64678	f	2/19/2011 1:30	alive	5/17/2010	278	EPSG:31466	3506617.25	5422242.5	3504721	5426918	fed	crossed	dispersal
HF-64678	f	2/20/2011 8:56	alive	5/17/2010	279	EPSG:31466	3506488.25	5422401	3504721	5426918	fed	crossed	dispersal
HF-64678	f	3/2/2011 16:28	alive	5/17/2010	289	EPSG:31466	3506482.75	5422397.5	3504721	5426918	fed	crossed	dispersal
HF-64678	f	3/6/2011 11:01	alive	5/17/2010	293	EPSG:31466	3506485	5422403.5	3504721	5426918	fed	crossed	dispersal
HF-64678	f	3/12/2011 22:27	alive	5/17/2010	299	EPSG:31466	3506851.5	5422205.5	3504721	5426918	fed	crossed	dispersal
HF-64678	f	3/13/2011 14:48	alive	5/17/2010	300	EPSG:31466	3506484.5	5422399.5	3504721	5426918	fed	crossed	dispersal
HF-64678	f	3/20/2011 0:46	alive	5/17/2010	307	EPSG:31466	3506464.75	5422438.5	3504721	5426918	fed	crossed	dispersal
HF-64678	f	3/28/2011 4:09	alive	5/17/2010	315	EPSG:31466	3506543.5	5422431	3504721	5426918	fed	crossed	dispersal
HF-64678	f	3/29/2011 14:55	alive	5/17/2010	316	EPSG:31466	3506480.25	5422397.5	3504721	5426918	fed	crossed	dispersal
HF-64679	f	6/15/2010 14:30	alive	5/19/2010	27	EPSG:31466	3504721	5426918.5	3504721	5426918	fed	not_crossed	natal
HF-64679	f	6/30/2010 12:35	alive	5/19/2010	42	EPSG:31466	3504700.25	5426920	3504721	5426918	fed	not_crossed	natal
HF-64679	f	7/2/2010 10:28	alive	5/19/2010	44	EPSG:31466	3504751	5426919	3504721	5426918	fed	not_crossed	natal
HF-64679	f	7/4/2010 10:56	alive	5/19/2010	46	EPSG:31466	3504751.25	5426924	3504721	5426918	fed	not_crossed	natal
HF-64679	f	7/6/2010 12:25	alive	5/19/2010	48	EPSG:31466	3504712.75	5426915	3504721	5426918	fed	not_crossed	natal
HF-64679	f	7/9/2010 9:15	alive	5/19/2010	51	EPSG:31466	3504720.5	5426928	3504721	5426918	fed	not_crossed	natal
HF-64679	f	7/10/2010 2:08	alive	5/19/2010	52	EPSG:31466	3504694.25	5426918.5	3504721	5426918	fed	not_crossed	natal
HF-64679	f	7/12/2010 16:30	alive	5/19/2010	54	EPSG:31466	3504709.75	5426926	3504721	5426918	fed	not_crossed	natal
HF-64679	f	7/17/2010 3:06	alive	5/19/2010	59	EPSG:31466	3504712.5	5426922	3504721	5426918	fed	not_crossed	natal
HF-64679	f	7/19/2010 17:11	alive	5/19/2010	61	EPSG:31466	3504712.5	5426926.5	3504721	5426918	fed	not_crossed	natal
HF-64679	f	7/25/2010 13:28	alive	5/19/2010	67	EPSG:31466	3504755	5426922	3504721	5426918	fed	not_crossed	natal
HF-64679	f	7/27/2010 1:34	alive	5/19/2010	69	EPSG:31466	3504766	5426867.5	3504721	5426918	fed	not_crossed	natal
HF-64679	f	7/30/2010 23:20	alive	5/19/2010	72	EPSG:31466	3504889.5	5426811.5	3504721	5426918	fed	not_crossed	natal
HF-64679	f	8/3/2010 2:53	alive	5/19/2010	76	EPSG:31466	3504845	5426946.5	3504721	5426918	fed	not_crossed	natal
HF-64679	f	8/8/2010 16:37	alive	5/19/2010	81	EPSG:31466	3504752.25	5426919	3504721	5426918	fed	not_crossed	natal
HF-64679	f	8/11/2010 4:59	alive	5/19/2010	84	EPSG:31466	3504679.25	5426999.5	3504721	5426918	fed	not_crossed	natal
HF-64679	f	8/17/2010 2:35	alive	5/19/2010	90	EPSG:31466	3504654	5427051.5	3504721	5426918	fed	not_crossed	natal
HF-64679	f	8/20/2010 22:24	alive	5/19/2010	93	EPSG:31466	3504600.75	5426732	3504721	5426918	fed	not_crossed	natal
HF-64679	f	8/25/2010 22:47	alive	5/19/2010	98	EPSG:31466	3504543.75	5427023	3504721	5426918	fed	not_crossed	natal
HF-64679	f	8/28/2010 21:37	alive	5/19/2010	101	EPSG:31466	3504652.75	5427055.5	3504721	5426918	fed	not_crossed	natal
HF-64679	f	8/29/2010 10:49	alive	5/19/2010	102	EPSG:31466	3504748.5	5426922.5	3504721	5426918	fed	not_crossed	natal
HF-64679	f	9/3/2010 22:53	alive	5/19/2010	107	EPSG:31466	3504915.25	5426883	3504721	5426918	fed	not_crossed	natal
HF-64679	f	9/6/2010 1:19	alive	5/19/2010	110	EPSG:31466	3504515.5	5427104.5	3504721	5426918	fed	not_crossed	natal
HF-64679	f	9/8/2010 23:22	alive	5/19/2010	112	EPSG:31466	3504646	5427066	3504721	5426918	fed	not_crossed	natal
HF-64679	f	9/12/2010 3:21	alive	5/19/2010	116	EPSG:31466	3505359.75	5427211	3504721	5426918	fed	not_crossed	forays
HF-64679	f	9/14/2010 22:53	alive	5/19/2010	118	EPSG:31466	3505331.5	5427165	3504721	5426918	fed	not_crossed	forays
HF-64679	f	9/17/2010 3:32	alive	5/19/2010	121	EPSG:31466	3504653.75	5427054	3504721	5426918	fed	not_crossed	natal
HF-64679	f	9/19/2010 17:28	alive	5/19/2010	123	EPSG:31466	3504710.75	5426928	3504721	5426918	fed	not_crossed	natal
HF-64679	f	9/21/2010 7:39	alive	5/19/2010	125	EPSG:31466	3501626.25	5423789.5	3504721	5426918	fed	not_crossed	forays
HF-64679	f	9/22/2010 22:03	alive	5/19/2010	126	EPSG:31466	3505395.25	5426847.5	3504721	5426918	fed	not_crossed	forays
HF-64679	f	9/23/2010 15:39	alive	5/19/2010	127	EPSG:31466	3504709.5	5426927.5	3504721	5426918	fed	not_crossed	natal
HF-64681	m	6/12/2010 13:20	alive	5/16/2010	27	EPSG:31466	3503112.25	5415865.5	3503112	5415865	fed	not_crossed	natal
HF-64681	m	6/29/2010 20:38	alive	5/16/2010	44	EPSG:31466	3503090.25	5415836.5	3503112	5415865	fed	not_crossed	natal
HF-64681	m	7/3/2010 11:39	alive	5/16/2010	48	EPSG:31466	3503059.25	5415826	3503112	5415865	fed	not_crossed	natal
HF-64681	m	7/5/2010 21:03	alive	5/16/2010	50	EPSG:31466	3503134.5	5415843.5	3503112	5415865	fed	not_crossed	natal
HF-64681	m	7/7/2010 13:17	alive	5/16/2010	52	EPSG:31466	3503137.25	5415825.5	3503112	5415865	fed	not_crossed	natal
HF-64681	m	7/9/2010 22:58	alive	5/16/2010	54	EPSG:31466	3503109.25	5415790	3503112	5415865	fed	not_crossed	natal
HF-64681	m	7/12/2010 23:03	alive	5/16/2010	57	EPSG:31466	3503141.75	5415779	3503112	5415865	fed	not_crossed	natal
HF-64681	m	7/13/2010 14:39	alive	5/16/2010	58	EPSG:31466	3503234.75	5415699	3503112	5415865	fed	not_crossed	natal
HF-64681	m	7/17/2010 0:11	alive	5/16/2010	62	EPSG:31466	3503008.5	5416004.5	3503112	5415865	fed	not_crossed	natal
HF-64681	m	7/20/2010 1:26	alive	5/16/2010	65	EPSG:31466	3503107	5415848	3503112	5415865	fed	not_crossed	natal
HF-64681	m	7/23/2010 21:45	alive	5/16/2010	68	EPSG:31466	3503221.5	5415760	3503112	5415865	fed	not_crossed	natal
HF-64681	m	7/26/2010 23:20	alive	5/16/2010	71	EPSG:31466	3503089.5	5415792	3503112	5415865	fed	not_crossed	natal
HF-64681	m	7/31/2010 1:45	alive	5/16/2010	76	EPSG:31466	3502893.75	5415818.5	3503112	5415865	fed	not_crossed	natal
HF-64681	m	8/2/2010 15:57	alive	5/16/2010	78	EPSG:31466	3503138.25	5415836	3503112	5415865	fed	not_crossed	natal
HF-64681	m	8/3/2010 0:38	alive	5/16/2010	79	EPSG:31466	3503115.75	5415796.5	3503112	5415865	fed	not_crossed	natal
HF-64681	m	8/9/2010 1:18	alive	5/16/2010	85	EPSG:31466	3502820.25	5415589	3503112	5415865	fed	not_crossed	forays
HF-64681	m	8/12/2010 17:05	alive	5/16/2010	88	EPSG:31466	3503139.5	5415841.5	3503112	5415865	fed	not_crossed	natal
HF-64681	m	8/13/2010 0:16	alive	5/16/2010	89	EPSG:31466	3502957.25	5415861.5	3503112	5415865	fed	not_crossed	natal
HF-64681	m	8/16/2010 23:47	alive	5/16/2010	92	EPSG:31466	3503156	5416083.5	3503112	5415865	fed	not_crossed	natal
HF-64681	m	8/18/2010 17:03	alive	5/16/2010	94	EPSG:31466	3503074.75	5415845	3503112	5415865	fed	not_crossed	natal
HF-64681	m	8/21/2010 2:19	alive	5/16/2010	97	EPSG:31466	3503803.75	5416000.5	3503112	5415865	fed	not_crossed	forays
HF-64681	m	8/25/2010 2:33	alive	5/16/2010	101	EPSG:31466	3503275.25	5416808	3503112	5415865	fed	not_crossed	forays
HF-64681	m	8/27/2010 17:35	alive	5/16/2010	103	EPSG:31466	3503083	5415838.5	3503112	5415865	fed	not_crossed	natal
HF-64681	m	8/30/2010 1:09	alive	5/16/2010	106	EPSG:31466	3503096.25	5415884	3503112	5415865	fed	not_crossed	natal
HF-64681	m	9/1/2010 16:27	alive	5/16/2010	108	EPSG:31466	3503081.25	5415837.5	3503112	5415865	fed	not_crossed	natal
HF-64681	m	9/2/2010 3:02	alive	5/16/2010	109	EPSG:31466	3503098.75	5415761.5	3503112	5415865	fed	not_crossed	natal
HF-64681	m	9/3/2010 21:50	alive	5/16/2010	110	EPSG:31466	3503259.75	5416186	3503112	5415865	fed	not_crossed	forays
HF-64681	m	9/6/2010 1:05	alive	5/16/2010	113	EPSG:31466	3503240.5	5416098.5	3503112	5415865	fed	not_crossed	natal
HF-64681	m	9/8/2010 22:55	alive	5/16/2010	115	EPSG:31466	3503060.25	5415830.5	3503112	5415865	fed	not_crossed	natal
HF-64681	m	9/11/2010 4:43	alive	5/16/2010	118	EPSG:31466	3503101	5415813	3503112	5415865	fed	not_crossed	natal
HF-64681	m	9/13/2010 2:35	alive	5/16/2010	120	EPSG:31466	3503180.25	5415865	3503112	5415865	fed	not_crossed	natal
HF-64681	m	9/15/2010 0:36	alive	5/16/2010	122	EPSG:31466	3503361.75	5416514	3503112	5415865	fed	not_crossed	forays
HF-64681	m	9/16/2010 23:42	alive	5/16/2010	123	EPSG:31466	3503373.75	5416237	3503112	5415865	fed	not_crossed	forays
HF-64681	m	9/17/2010 10:59	alive	5/16/2010	124	EPSG:31466	3503084	5415838.5	3503112	5415865	fed	not_crossed	natal
HF-64681	m	9/19/2010 4:32	alive	5/16/2010	126	EPSG:31466	3502843.25	5415747.5	3503112	5415865	fed	not_crossed	natal
HF-64681	m	9/21/2010 0:03	alive	5/16/2010	128	EPSG:31466	3502929	5415843	3503112	5415865	fed	not_crossed	natal
HF-64681	m	9/22/2010 22:32	alive	5/16/2010	129	EPSG:31466	3503581.25	5416767	3503112	5415865	fed	not_crossed	forays
HF-64681	m	9/23/2010 14:42	alive	5/16/2010	130	EPSG:31466	3503076.75	5415845.5	3503112	5415865	fed	not_crossed	natal
HF-64681	m	9/25/2010 5:10	alive	5/16/2010	132	EPSG:31466	3503353.5	5416334	3503112	5415865	fed	not_crossed	forays
HF-64681	m	9/27/2010 2:36	alive	5/16/2010	134	EPSG:31466	3503530.25	5416444	3503112	5415865	fed	not_crossed	forays
HF-64681	m	9/29/2010 2:07	alive	5/16/2010	136	EPSG:31466	3502922.5	5415705	3503112	5415865	fed	not_crossed	natal
HF-64681	m	10/1/2010 2:19	alive	5/16/2010	138	EPSG:31466	3502814.5	5416051.5	3503112	5415865	fed	not_crossed	forays
HF-64681	m	10/2/2010 17:31	alive	5/16/2010	139	EPSG:31466	3503082.25	5415843.5	3503112	5415865	fed	not_crossed	natal
HF-64681	m	10/3/2010 3:01	alive	5/16/2010	140	EPSG:31466	3503515.25	5416397	3503112	5415865	fed	not_crossed	forays
HF-64681	m	10/5/2010 0:56	alive	5/16/2010	142	EPSG:31466	3503544	5416255.5	3503112	5415865	fed	not_crossed	forays
HF-64681	m	10/7/2010 23:02	alive	5/16/2010	144	EPSG:31466	3503360.75	5416403.5	3503112	5415865	fed	not_crossed	forays
HF-64681	m	10/11/2010 0:11	alive	5/16/2010	148	EPSG:31466	3503315.5	5416301.5	3503112	5415865	fed	not_crossed	forays
HF-64681	m	10/13/2010 16:41	alive	5/16/2010	150	EPSG:31466	3503094.5	5415850.5	3503112	5415865	fed	not_crossed	natal
HF-64681	m	10/14/2010 0:53	alive	5/16/2010	151	EPSG:31466	3502966.25	5416839.5	3503112	5415865	fed	not_crossed	dispersal
HF-64681	m	10/18/2010 22:33	alive	5/16/2010	155	EPSG:31466	3503258	5416802	3503112	5415865	fed	not_crossed	dispersal
HF-64681	m	10/21/2010 1:15	alive	5/16/2010	158	EPSG:31466	3503594	5417139.5	3503112	5415865	fed	not_crossed	dispersal
HF-64681	m	10/23/2010 2:45	alive	5/16/2010	160	EPSG:31466	3503194.25	5416756	3503112	5415865	fed	not_crossed	dispersal
HF-64681	m	10/25/2010 23:00	alive	5/16/2010	162	EPSG:31466	3503311	5416767.5	3503112	5415865	fed	not_crossed	dispersal
HF-64681	m	11/3/2010 0:38	alive	5/16/2010	171	EPSG:31466	3503199	5416746.5	3503112	5415865	fed	not_crossed	dispersal
HF-64681	m	11/6/2010 14:41	alive	5/16/2010	174	EPSG:31466	3502971.5	5416836.5	3503112	5415865	fed	not_crossed	dispersal
HF-64681	m	11/7/2010 23:07	alive	5/16/2010	175	EPSG:31466	3502996.5	5416861	3503112	5415865	fed	not_crossed	dispersal
HF-64681	m	11/17/2010 15:38	alive	5/16/2010	185	EPSG:31466	3502964	5416874.5	3503112	5415865	fed	not_crossed	dispersal
HF-64681	m	11/19/2010 20:13	alive	5/16/2010	187	EPSG:31466	3502994	5416861.5	3503112	5415865	fed	not_crossed	dispersal
HF-64681	m	11/29/2010 3:41	alive	5/16/2010	197	EPSG:31466	3502997	5416829.5	3503112	5415865	fed	not_crossed	dispersal
HF-64681	m	11/30/2010 9:17	alive	5/16/2010	198	EPSG:31466	3502962.75	5416873.5	3503112	5415865	fed	not_crossed	dispersal
HF-64682	m	6/12/2010 11:45	alive	5/19/2010	24	EPSG:31466	3503112.25	5415865.5	3503112	5415865	fed	crossed	natal
HF-64682	m	7/3/2010 11:41	alive	5/19/2010	45	EPSG:31466	3503087.75	5415853	3503112	5415865	fed	crossed	natal
HF-64682	m	7/5/2010 21:15	alive	5/19/2010	47	EPSG:31466	3503105.5	5415869.5	3503112	5415865	fed	crossed	natal
HF-64682	m	7/7/2010 13:16	alive	5/19/2010	49	EPSG:31466	3503127.75	5415828	3503112	5415865	fed	crossed	natal
HF-64682	m	7/9/2010 22:45	alive	5/19/2010	51	EPSG:31466	3503081	5415813.5	3503112	5415865	fed	crossed	natal
HF-64682	m	7/12/2010 23:23	alive	5/19/2010	54	EPSG:31466	3503081.5	5415872	3503112	5415865	fed	crossed	natal
HF-64682	m	7/13/2010 14:58	alive	5/19/2010	55	EPSG:31466	3503138.25	5415834	3503112	5415865	fed	crossed	natal
HF-64682	m	7/17/2010 0:44	alive	5/19/2010	59	EPSG:31466	3503060.5	5415815.5	3503112	5415865	fed	crossed	natal
HF-64682	m	7/20/2010 2:01	alive	5/19/2010	62	EPSG:31466	3503148	5415778	3503112	5415865	fed	crossed	natal
HF-64682	m	7/23/2010 23:05	alive	5/19/2010	65	EPSG:31466	3503178.5	5415790.5	3503112	5415865	fed	crossed	natal
HF-64682	m	7/26/2010 23:50	alive	5/19/2010	68	EPSG:31466	3503143.25	5415962.5	3503112	5415865	fed	crossed	natal
HF-64682	m	7/31/2010 1:17	alive	5/19/2010	73	EPSG:31466	3503089.25	5415878.5	3503112	5415865	fed	crossed	natal
HF-64682	m	8/2/2010 16:00	alive	5/19/2010	75	EPSG:31466	3503139.75	5415836	3503112	5415865	fed	crossed	natal
HF-64682	m	8/3/2010 1:03	alive	5/19/2010	76	EPSG:31466	3503108.75	5415821.5	3503112	5415865	fed	crossed	natal
HF-64682	m	8/9/2010 2:35	alive	5/19/2010	82	EPSG:31466	3502882.5	5415848.5	3503112	5415865	fed	crossed	natal
HF-64682	m	8/12/2010 17:26	alive	5/19/2010	85	EPSG:31466	3503451.75	5415816	3503112	5415865	fed	crossed	forays
HF-64682	m	8/13/2010 0:54	alive	5/19/2010	86	EPSG:31466	3503134	5415799.5	3503112	5415865	fed	crossed	natal
HF-64682	m	8/17/2010 0:07	alive	5/19/2010	90	EPSG:31466	3503135.25	5415794.5	3503112	5415865	fed	crossed	natal
HF-64682	m	8/18/2010 17:11	alive	5/19/2010	91	EPSG:31466	3503135.5	5415839.5	3503112	5415865	fed	crossed	natal
HF-64682	m	8/21/2010 0:38	alive	5/19/2010	94	EPSG:31466	3503223	5416157.5	3503112	5415865	fed	crossed	forays
HF-64682	m	8/25/2010 4:15	alive	5/19/2010	98	EPSG:31466	3503907.25	5415871	3503112	5415865	fed	crossed	forays
HF-64682	m	8/27/2010 17:20	alive	5/19/2010	100	EPSG:31466	3503085.25	5415838.5	3503112	5415865	fed	crossed	natal
HF-64682	m	8/30/2010 1:42	alive	5/19/2010	103	EPSG:31466	3503132.75	5415887.5	3503112	5415865	fed	crossed	natal
HF-64682	m	9/1/2010 16:04	alive	5/19/2010	105	EPSG:31466	3503133.75	5415826	3503112	5415865	fed	crossed	natal
HF-64682	m	9/2/2010 5:26	alive	5/19/2010	106	EPSG:31466	3502930.75	5415835.5	3503112	5415865	fed	crossed	natal
HF-64682	m	9/3/2010 22:26	alive	5/19/2010	107	EPSG:31466	3503114.75	5415892.5	3503112	5415865	fed	crossed	natal
HF-64682	m	9/5/2010 22:23	alive	5/19/2010	109	EPSG:31466	3502801.75	5416348.5	3503112	5415865	fed	crossed	forays
HF-64682	m	9/6/2010 15:36	alive	5/19/2010	110	EPSG:31466	3503141.5	5415819.5	3503112	5415865	fed	crossed	natal
HF-64682	m	9/8/2010 10:16	alive	5/19/2010	112	EPSG:31466	3503134.5	5415828.5	3503112	5415865	fed	crossed	natal
HF-64682	m	9/9/2010 0:20	alive	5/19/2010	113	EPSG:31466	3502764	5417074.5	3503112	5415865	fed	crossed	forays
HF-64682	m	9/11/2010 1:23	alive	5/19/2010	115	EPSG:31466	3503381.75	5416343	3503112	5415865	fed	crossed	forays
HF-64682	m	9/12/2010 22:04	alive	5/19/2010	116	EPSG:31466	3503283.75	5416225	3503112	5415865	fed	crossed	forays
HF-64682	m	9/15/2010 0:20	alive	5/19/2010	119	EPSG:31466	3503287	5416834	3503112	5415865	fed	crossed	forays
HF-64682	m	9/17/2010 1:08	alive	5/19/2010	121	EPSG:31466	3503372.5	5416273.5	3503112	5415865	fed	crossed	forays
HF-64682	m	9/18/2010 0:23	alive	5/19/2010	122	EPSG:31466	3503280.5	5413466.5	3503112	5415865	fed	crossed	forays
HF-64682	m	9/21/2010 3:49	alive	5/19/2010	125	EPSG:31466	3503864	5416755.5	3503112	5415865	fed	crossed	forays
HF-64682	m	9/22/2010 17:14	alive	5/19/2010	126	EPSG:31466	3504105.5	5418066	3503112	5415865	fed	crossed	forays
HF-64682	m	9/23/2010 14:42	alive	5/19/2010	127	EPSG:31466	3503119	5415788.5	3503112	5415865	fed	crossed	natal
HF-64682	m	9/25/2010 3:18	alive	5/19/2010	129	EPSG:31466	3503161	5415800	3503112	5415865	fed	crossed	natal
HF-64682	m	9/27/2010 1:20	alive	5/19/2010	131	EPSG:31466	3502590.5	5415502	3503112	5415865	fed	crossed	forays
HF-64682	m	9/29/2010 2:53	alive	5/19/2010	133	EPSG:31466	3503904.25	5416695.5	3503112	5415865	fed	crossed	forays
HF-64682	m	10/1/2010 2:41	alive	5/19/2010	135	EPSG:31466	3503072.75	5415886.5	3503112	5415865	fed	crossed	natal
HF-64682	m	10/2/2010 16:51	alive	5/19/2010	136	EPSG:31466	3503140	5415781	3503112	5415865	fed	crossed	natal
HF-64682	m	10/3/2010 4:17	alive	5/19/2010	137	EPSG:31466	3504004	5418695.5	3503112	5415865	fed	crossed	dispersal
HF-64682	m	10/4/2010 15:13	alive	5/19/2010	138	EPSG:31466	3504351.75	5418462.5	3503112	5415865	fed	crossed	dispersal
HF-64682	m	10/8/2010 21:26	alive	5/19/2010	142	EPSG:31466	3504081.25	5418435	3503112	5415865	fed	crossed	dispersal
HF-64682	m	10/11/2010 23:52	alive	5/19/2010	145	EPSG:31466	3504337.25	5418480.5	3503112	5415865	fed	crossed	dispersal
HF-64682	m	10/14/2010 0:57	alive	5/19/2010	148	EPSG:31466	3504332.75	5418424	3503112	5415865	fed	crossed	dispersal
HF-64682	m	10/18/2010 23:08	alive	5/19/2010	152	EPSG:31466	3504455.25	5418284.5	3503112	5415865	fed	crossed	dispersal
HF-64682	m	10/21/2010 18:13	alive	5/19/2010	155	EPSG:31466	3504351.75	5418466	3503112	5415865	fed	crossed	dispersal
HF-64682	m	10/23/2010 3:25	alive	5/19/2010	157	EPSG:31466	3504397	5418208	3503112	5415865	fed	crossed	dispersal
HF-64682	m	10/25/2010 22:10	alive	5/19/2010	159	EPSG:31466	3504317.25	5418441.5	3503112	5415865	fed	crossed	dispersal
HF-64682	m	11/3/2010 1:08	alive	5/19/2010	168	EPSG:31466	3503888.5	5418193.5	3503112	5415865	fed	crossed	dispersal
HF-64682	m	11/6/2010 14:17	alive	5/19/2010	171	EPSG:31466	3504208	5418107	3503112	5415865	fed	crossed	dispersal
HF-64682	m	11/7/2010 22:41	alive	5/19/2010	172	EPSG:31466	3504343	5418476	3503112	5415865	fed	crossed	dispersal
HF-64682	m	11/18/2010 14:11	alive	5/19/2010	183	EPSG:31466	3504191.25	5418082.5	3503112	5415865	fed	crossed	dispersal
HF-64682	m	11/19/2010 20:31	alive	5/19/2010	184	EPSG:31466	3504289	5418556.5	3503112	5415865	fed	crossed	dispersal
HF-64682	m	11/29/2010 3:16	alive	5/19/2010	194	EPSG:31466	3504335.5	5418477	3503112	5415865	fed	crossed	dispersal
HF-64682	m	11/30/2010 9:34	alive	5/19/2010	195	EPSG:31466	3504191.25	5418087.5	3503112	5415865	fed	crossed	dispersal
HF-64683	f	6/15/2010 18:00	alive	5/17/2010	29	EPSG:31466	3503112.25	5415865.5	3503112	5415865	fed	not_crossed	natal
HF-64683	f	6/29/2010 20:41	alive	5/17/2010	43	EPSG:31466	3503092	5415837.5	3503112	5415865	fed	not_crossed	natal
HF-64683	f	7/3/2010 11:39	alive	5/17/2010	47	EPSG:31466	3503057.75	5415820.5	3503112	5415865	fed	not_crossed	natal
HF-64683	f	7/5/2010 21:07	alive	5/17/2010	49	EPSG:31466	3503079.25	5415834	3503112	5415865	fed	not_crossed	natal
HF-64683	f	7/7/2010 12:46	alive	5/17/2010	51	EPSG:31466	3503127.5	5415825	3503112	5415865	fed	not_crossed	natal
HF-64683	f	7/9/2010 12:06	alive	5/17/2010	53	EPSG:31466	3503088.25	5415834.5	3503112	5415865	fed	not_crossed	natal
HF-64683	f	7/12/2010 23:10	alive	5/17/2010	56	EPSG:31466	3503106	5415888	3503112	5415865	fed	not_crossed	natal
HF-64683	f	7/13/2010 14:47	alive	5/17/2010	57	EPSG:31466	3503118.25	5415828	3503112	5415865	fed	not_crossed	natal
HF-64683	f	7/17/2010 0:29	alive	5/17/2010	61	EPSG:31466	3503081.75	5415817.5	3503112	5415865	fed	not_crossed	natal
HF-64683	f	7/20/2010 18:35	alive	5/17/2010	64	EPSG:31466	3503138.75	5415805	3503112	5415865	fed	not_crossed	natal
HF-64683	f	7/23/2010 22:03	alive	5/17/2010	67	EPSG:31466	3502925.25	5415840	3503112	5415865	fed	not_crossed	natal
HF-64683	f	7/26/2010 17:09	alive	5/17/2010	70	EPSG:31466	3503133.75	5415787.5	3503112	5415865	fed	not_crossed	natal
HF-64683	f	7/31/2010 1:26	alive	5/17/2010	75	EPSG:31466	3503099.75	5415882	3503112	5415865	fed	not_crossed	natal
HF-64683	f	8/2/2010 15:58	alive	5/17/2010	77	EPSG:31466	3503140	5415837.5	3503112	5415865	fed	not_crossed	natal
HF-64683	f	8/3/2010 0:43	alive	5/17/2010	78	EPSG:31466	3503129.75	5415848.5	3503112	5415865	fed	not_crossed	natal
HF-64683	f	8/9/2010 2:40	alive	5/17/2010	84	EPSG:31466	3502945.25	5415702	3503112	5415865	fed	not_crossed	natal
HF-64683	f	8/12/2010 17:10	alive	5/17/2010	87	EPSG:31466	3503133.75	5415839	3503112	5415865	fed	not_crossed	natal
HF-64683	f	8/13/2010 0:25	alive	5/17/2010	88	EPSG:31466	3503099.25	5415812.5	3503112	5415865	fed	not_crossed	natal
HF-64683	f	8/16/2010 23:57	alive	5/17/2010	91	EPSG:31466	3503088.75	5415884	3503112	5415865	fed	not_crossed	natal
HF-64683	f	8/17/2010 0:02	alive	5/17/2010	92	EPSG:31466	3503095.5	5415885.5	3503112	5415865	fed	not_crossed	natal
HF-64683	f	8/18/2010 17:06	alive	5/17/2010	93	EPSG:31466	3503075.25	5415846	3503112	5415865	fed	not_crossed	natal
HF-64683	f	8/21/2010 2:30	alive	5/17/2010	96	EPSG:31466	3503448.25	5416080.5	3503112	5415865	fed	not_crossed	forays
HF-64683	f	8/25/2010 2:03	alive	5/17/2010	100	EPSG:31466	3503310.5	5416184.5	3503112	5415865	fed	not_crossed	forays
HF-64683	f	8/27/2010 17:30	alive	5/17/2010	102	EPSG:31466	3503081.5	5415839	3503112	5415865	fed	not_crossed	natal
HF-64683	f	8/30/2010 1:19	alive	5/17/2010	105	EPSG:31466	3503189	5416047.5	3503112	5415865	fed	not_crossed	natal
HF-64683	f	9/1/2010 16:23	alive	5/17/2010	107	EPSG:31466	3503082.25	5415843.5	3503112	5415865	fed	not_crossed	natal
HF-64683	f	9/2/2010 3:52	alive	5/17/2010	108	EPSG:31466	3503130.75	5415978.5	3503112	5415865	fed	not_crossed	natal
HF-64683	f	9/3/2010 22:06	alive	5/17/2010	109	EPSG:31466	3503214	5415859	3503112	5415865	fed	not_crossed	natal
HF-64683	f	9/6/2010 2:02	alive	5/17/2010	112	EPSG:31466	3502938.5	5415417	3503112	5415865	fed	not_crossed	forays
HF-64683	f	9/8/2010 23:07	alive	5/17/2010	114	EPSG:31466	3502896.25	5415723.5	3503112	5415865	fed	not_crossed	natal
HF-64683	f	9/22/2010 14:14	alive	5/17/2010	128	EPSG:31466	3495735	5421481	3503112	5415865	fed	not_crossed	dispersal
HF-64683	f	9/28/2010 14:00	alive	5/17/2010	134	EPSG:31466	3510457.25	5442442	3503112	5415865	fed	not_crossed	dispersal
HF-64683	f	9/29/2010 23:02	alive	5/17/2010	135	EPSG:31466	3509893	5442574	3503112	5415865	fed	not_crossed	dispersal
HF-64683	f	9/30/2010 21:58	alive	5/17/2010	136	EPSG:31466	3510239.5	5442271	3503112	5415865	fed	not_crossed	dispersal
HF-64683	f	10/2/2010 0:24	alive	5/17/2010	138	EPSG:31466	3508936.75	5442525	3503112	5415865	fed	not_crossed	dispersal
HF-64683	f	10/8/2010 20:55	alive	5/17/2010	144	EPSG:31466	3503352	5415413	3503112	5415865	fed	not_crossed	dispersal
HF-64683	f	10/10/2010 15:54	alive	5/17/2010	146	EPSG:31466	3495295.5	5412672.5	3503112	5415865	fed	not_crossed	dispersal
HF-64683	f	10/11/2010 17:47	alive	5/17/2010	147	EPSG:31466	3495624.5	5412675	3503112	5415865	fed	not_crossed	dispersal
HF-64683	f	10/12/2010 0:44	alive	5/17/2010	148	EPSG:31466	3495738.5	5412571	3503112	5415865	fed	not_crossed	dispersal
HF-64683	f	10/13/2010 22:11	alive	5/17/2010	149	EPSG:31466	3496173.75	5412762.5	3503112	5415865	fed	not_crossed	dispersal
HF-64683	f	10/19/2010 1:38	alive	5/17/2010	155	EPSG:31466	3495722.75	5412561.5	3503112	5415865	fed	not_crossed	dispersal
HF-64683	f	10/20/2010 12:45	alive	5/17/2010	156	EPSG:31466	3495281	5412668.5	3503112	5415865	fed	not_crossed	dispersal
HF-64683	f	10/22/2010 23:27	alive	5/17/2010	158	EPSG:31466	3498326.75	5413152.5	3503112	5415865	fed	not_crossed	dispersal
HF-64683	f	10/25/2010 23:40	alive	5/17/2010	161	EPSG:31466	3498322.5	5413163	3503112	5415865	fed	not_crossed	dispersal
HF-64683	f	10/27/2010 4:41	alive	5/17/2010	163	EPSG:31466	3498295.75	5413114.5	3503112	5415865	fed	not_crossed	dispersal
HF-64683	f	10/28/2010 16:49	alive	5/17/2010	164	EPSG:31466	3498145.5	5413501	3503112	5415865	fed	not_crossed	dispersal
HF-64683	f	11/2/2010 20:39	alive	5/17/2010	169	EPSG:31466	3498364.5	5413503.5	3503112	5415865	fed	not_crossed	dispersal
HF-64683	f	11/7/2010 0:46	alive	5/17/2010	174	EPSG:31466	3498150.5	5413330	3503112	5415865	fed	not_crossed	dispersal
HF-64683	f	11/9/2010 14:10	alive	5/17/2010	176	EPSG:31466	3498155	5413496.5	3503112	5415865	fed	not_crossed	dispersal
HF-64683	f	11/18/2010 1:52	alive	5/17/2010	185	EPSG:31466	3498444.75	5413364.5	3503112	5415865	fed	not_crossed	dispersal
HF-64683	f	11/21/2010 15:19	alive	5/17/2010	188	EPSG:31466	3498228.5	5413125	3503112	5415865	fed	not_crossed	dispersal
HF-64683	f	11/24/2010 1:51	alive	5/17/2010	191	EPSG:31466	3498134	5413332.5	3503112	5415865	fed	not_crossed	dispersal
HF-64683	f	11/25/2010 11:17	alive	5/17/2010	192	EPSG:31466	3498145.25	5413505	3503112	5415865	fed	not_crossed	dispersal
HF-64683	f	12/2/2010 13:00	alive	5/17/2010	199	EPSG:31466	3498156.5	5413523	3503112	5415865	fed	not_crossed	dispersal
HF-64683	f	12/14/2010 21:00	alive	5/17/2010	211	EPSG:31466	3498173.5	5413665	3503112	5415865	fed	not_crossed	dispersal
HF-64683	f	12/18/2010 15:08	alive	5/17/2010	215	EPSG:31466	3498181.25	5413619	3503112	5415865	fed	not_crossed	dispersal
[truncated: 7,244 more rows]
